# Supplementary material for: Developmental Plasticity in Butterfly Eyespot Mutants: Variation in Thermal Reaction Norms across Genotypes and Pigmentation Traits
Source: MDPI journal article supplement (doi:10.3390/insects13111000), 2022-10-31
Supplement: s1 [file s1]

Table S2 - *Sample sizes*. Number of females (F) and males (M) measured for each of the target eyespots and wings from each genetic line (WT, BE, Fr, Choc) at each of the three temperatures (in the order: 19°C-23°C-27°C). For BE and Fr, the top row represents individuals of mutant phenotype (heterozygous at eyespot pigmentation locus) and the bottom row represents individuals of the wildtype phenotype (homozygous for the wildtype allele).

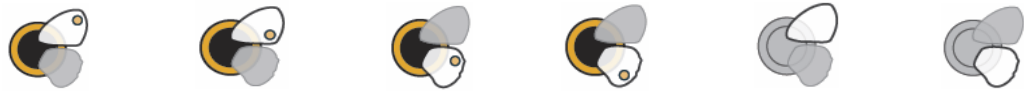

|        | eA       | eP                   | e2       | e5                   | forewing             | hindwing             |
|--------|----------|----------------------|----------|----------------------|----------------------|----------------------|
| WT-F   | 30-30-30 | 30-30-30             | 27-30-30 | 27-30-30             | 32-30-31             | 29-30-30             |
| WT-M   | 12-30-31 | 12-30-31             | 7-29-27  | 7-28-27              | 12-30-31             | 7-29-27              |
| Choc-F | 19-19-29 | 19-19-29             | 16-18-26 | 16-18-26             | 21-20-32             | 16-18-26             |
| Choc-M | 17-19-21 | 17-20-21             | 15-20-20 | 16-20-20             | 18-20-22             | 16-20-20             |
| BE-F   | 9-7-22   | 10-7-22<br>5-5-7     | 8-6-19   | 9-6-19<br>4-5-5      | 10-7-22<br>5-5-7     | 9-6-19<br>4-5-5      |
| BE-M   | 6-8-15   | 6-8-15<br>5-9-4      | 5-6-12   | 5-6-13<br>5-9-4      | 6-8-15<br>5-9-4      | 5-6-13<br>5-10-4     |
| Fr-F   | 20-26-44 | 20-27-44<br>22-35-21 | 15-23-40 | 15-23-40<br>19-34-18 | 21-27-45<br>23-36-21 | 15-23-40<br>20-34-18 |
| Fr-M   | 18-20-17 | 18-20-27<br>15-37-16 | 17-16-15 | 17-16-15<br>15-37-15 | 18-20-17<br>15-40-16 | 17-16-15<br>15-37-33 |

For each of the target eyespot rings (symbols), the tables display the results of the statistical tests for the effects of temperature (T), genotype (G), and GxT on **female eyespot ring area** using the corresponding wing area (forewing, fw, for eA and eP, and hindwing, hw, for e2 and e5) as covariate (model:  $\text{ring\_area} \sim \text{wing\_area} + \text{Temperature} * \text{Genotype}$ ; top table), and pairwise comparisons (Tukey HSD where same letters in column “Groups” correspond to pairs of values not significantly different with  $\alpha=0.01$ ; bottom table).

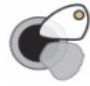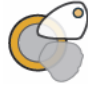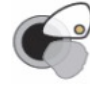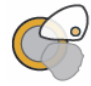

|     |    | eA_black |        |          | eA_gold |        |          | eP_black |        |          | eP_gold |        |          |
|-----|----|----------|--------|----------|---------|--------|----------|----------|--------|----------|---------|--------|----------|
|     | Df | Dev      | F      | P        | Dev     | F      | P        | Dev      | F      | P        | Dev     | F      | P        |
| fw  | 1  | 0.31     | 8.37   | 0.004    | 0.02    | 0.95   | 0.32     | 0.02     | 3.69   | 0.05     | 0.07    | 10.99  | 0.001    |
| G   | 3  | 2.72     | 24.33  | 5.58e-14 | 5.73    | 77.37  | <2.2e-16 | 3.73     | 192.05 | <2.2e-16 | 2.00    | 98.96  | <2.2e-16 |
| T   | 2  | 11.46    | 153.79 | <2.2e-16 | 8.25    | 167.23 | <2.2e-16 | 1.87     | 144.10 | <2.2e-16 | 1.43    | 106.36 | <2.2e-16 |
| GxT | 6  | 1.38     | 6.17   | 4.34e-06 | 0.83    | 5.64   | 1.53e-05 | 1.04     | 26.90  | <2.2e-16 | 0.28    | 7.10   | 4.73e-07 |

| HSD     |  | Means |  | Groups |  | Means  |  | Groups |  | Means |  | Groups |  | Means  |  | Groups |  |
|---------|--|-------|--|--------|--|--------|--|--------|--|-------|--|--------|--|--------|--|--------|--|
| WT_19   |  | 2.517 |  | a      |  | -0.124 |  | d      |  | 0.798 |  | d      |  | 5.822  |  | ef     |  |
| WT_23   |  | 2.492 |  | a      |  | 0.130  |  | bc     |  | 0.830 |  | d      |  | 6.958  |  | de     |  |
| WT_27   |  | 2.424 |  | b      |  | 0.183  |  | b      |  | 0.843 |  | cd     |  | 6.929  |  | de     |  |
| Choc_19 |  | 2.491 |  | a      |  | -0.323 |  | e      |  | 0.701 |  | e      |  | 4.937  |  | f      |  |
| Choc_23 |  | 2.468 |  | ab     |  | 0.002  |  | cd     |  | 0.835 |  | d      |  | 7.249  |  | cde    |  |
| Choc_27 |  | 2.434 |  | ab     |  | 0.042  |  | bcd    |  | 0.811 |  | d      |  | 7.903  |  | cd     |  |
| Fr_19   |  | 2.458 |  | ab     |  | -0.047 |  | d      |  | 0.410 |  | f      |  | 6.481  |  | def    |  |
| Fr_23   |  | 2.460 |  | ab     |  | 0.197  |  | b      |  | 0.684 |  | e      |  | 8.748  |  | cd     |  |
| Fr_27   |  | 2.419 |  | b      |  | 0.484  |  | a      |  | 0.806 |  | d      |  | 10.910 |  | b      |  |
| BE_19   |  | 2.483 |  | ab     |  | -0.124 |  | de     |  | 0.954 |  | bc     |  | 9.254  |  | bc     |  |
| BE_23   |  | 2.513 |  | a      |  | 0.102  |  | bcd    |  | 1.008 |  | ab     |  | 9.014  |  | bcd    |  |
| BE_27   |  | 2.445 |  | ab     |  | 0.386  |  | a      |  | 1.105 |  | a      |  | 12.720 |  | a      |  |

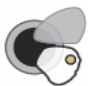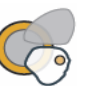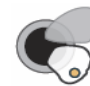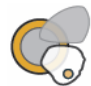

|     |    | e2_black |        |          | e2_gold |        |          | e5_black |        |          | e5_gold |        |          |
|-----|----|----------|--------|----------|---------|--------|----------|----------|--------|----------|---------|--------|----------|
|     | Df | Dev      | F      | P        | Dev     | F      | P        | Dev      | F      | P        | Dev     | F      | P        |
| hw  | 1  | 0.42     | 8.36   | 0.004    | 0.36    | 29.72  | 1.21e-07 | 0.06     | 4.21   | 0.04     | 0.62    | 46.97  | 5.74e-11 |
| G   | 3  | 5.18     | 33.80  | <2.2e-16 | 4.28    | 117.81 | <2.2e-16 | 2.13     | 48.43  | <2.2e-16 | 3.96    | 99.37  | <2.2e-16 |
| T   | 2  | 19.22    | 188.20 | <2.2e-16 | 5.30    | 218.76 | <2.2e-16 | 6.81     | 232.25 | <2.2e-16 | 6.13    | 230.59 | <2.2e-16 |
| GxT | 6  | 2.30     | 7.53   | 1.99e-07 | 0.95    | 13.19  | 6.14e-13 | 0.67     | 7.63   | 1.56e-07 | 0.50    | 6.37   | 2.95e-06 |

| HSD     |  | Means  |  | Groups |  |
|---------|--|--------|--|--------|--|--------|--|--------|--|--------|--|--------|--|--------|--|--------|--|
| WT_19   |  | -0.769 |  | d      |  | -0.445 |  | e      |  | 0.214  |  | c      |  | 0.068  |  | e      |  |
| WT_23   |  | -0.420 |  | abc    |  | -0.267 |  | c      |  | 0.406  |  | b      |  | 0.243  |  | cd     |  |
| WT_27   |  | -0.317 |  | ab     |  | -0.263 |  | c      |  | 0.478  |  | b      |  | 0.335  |  | bc     |  |
| Choc_19 |  | -1.259 |  | e      |  | -0.656 |  | f      |  | 0.001  |  | d      |  | -0.110 |  | f      |  |
| Choc_23 |  | -0.724 |  | cd     |  | -0.402 |  | de     |  | 0.308  |  | bc     |  | 0.174  |  | de     |  |
| Choc_27 |  | -0.528 |  | bc     |  | -0.286 |  | cd     |  | 0.379  |  | b      |  | 0.289  |  | bcd    |  |
| Fr_19   |  | -1.248 |  | e      |  | -0.485 |  | e      |  | -0.172 |  | e      |  | 0.103  |  | e      |  |
| Fr_23   |  | -0.375 |  | ab     |  | -0.135 |  | bc     |  | 0.242  |  | c      |  | 0.414  |  | b      |  |
| Fr_27   |  | -0.218 |  | a      |  | 0.063  |  | a      |  | 0.407  |  | b      |  | 0.594  |  | a      |  |
| BE_19   |  | -0.881 |  | de     |  | -0.459 |  | e      |  | 0.195  |  | c      |  | 0.048  |  | ef     |  |
| BE_23   |  | -0.376 |  | abc    |  | -0.128 |  | bc     |  | 0.494  |  | ab     |  | 0.392  |  | bc     |  |
| BE_27   |  | -0.274 |  | ab     |  | -0.008 |  | ab     |  | 0.658  |  | a      |  | 0.591  |  | a      |  |

For each of the target eyespot rings (symbols), the tables display the results of the statistical tests for the effects of temperature (T), genotype (G), and GxT on **male eyespot ring area** using the corresponding wing area (forewing, fw, for eA and eP, and hindwing, hw, for e2 and e5) as covariate (model:  $\text{ring\_area} \sim \text{wing\_area} + \text{Temperature} * \text{Genotype}$ ; top table), and pairwise comparisons (Tukey HSD where same letters in column “Groups” correspond to pairs of values not significantly different with  $\alpha=0.01$ ; bottom table).



|     |    | eA_black |        |          | eA_gold |        |        | eP_black |        |          | eP_gold |       |          |
|-----|----|----------|--------|----------|---------|--------|--------|----------|--------|----------|---------|-------|----------|
|     | Df | Dev      | F      | P        | Dev     | F      | P      | Dev      | F      | P        | Dev     | F     | P        |
| fw  | 1  | 0.01     | 0.20   | 0.65     | 0.01    | 0.04   | 0.83   | 43.37    | 47.16  | 7.89e-11 | 0.10    | 8.84  | 0.003    |
| G   | 3  | 24.54    | 89.39  | <2.2e-16 | 2.59    | 38.30  | <2e-16 | 690.30   | 250.20 | <2.2e-16 | 1.57    | 42.42 | <2.2e-16 |
| T   | 2  | 25.79    | 140.93 | <2.2e-16 | 6.47    | 143.44 | <2e-16 | 287.62   | 156.37 | <2.2e-16 | 1.57    | 42.42 | <2.2e-16 |
| GxT | 6  | 1.68     | 3.07   | 0.006    | 0.35    | 2.59   | 0.01   | 17.22    | 3.12   | 0.006    | 0.08    | 1.08  | 0.37     |

| HSD     |  | Means | Groups | Means | Groups | Means | Groups | Means | Groups |
|---------|--|-------|--------|-------|--------|-------|--------|-------|--------|
| WT_19   |  | 0.207 | g      | 2.566 | f      | 0.355 | e      | 2.566 | e      |
| WT_23   |  | 0.697 | ef     | 3.720 | cd     | 0.594 | d      | 3.720 | de     |
| WT_27   |  | 1.133 | bc     | 4.107 | b      | 0.657 | cd     | 4.107 | de     |
| Choc_19 |  | 0.240 | g      | 2.484 | ef     | 0.389 | e      | 2.484 | e      |
| Choc_23 |  | 0.758 | def    | 4.093 | bcd    | 0.646 | cd     | 4.093 | de     |
| Choc_27 |  | 1.054 | bcd    | 4.467 | bc     | 0.718 | c      | 4.467 | cd     |
| Fr_19   |  | 0.190 | g      | 2.949 | de     | 0.083 | f      | 2.949 | e      |
| Fr_23   |  | 0.419 | fg     | 3.792 | bcd    | 0.340 | e      | 3.792 | de     |
| Fr_27   |  | 0.890 | cde    | 5.508 | a      | 0.618 | cd     | 5.508 | bc     |
| BE_19   |  | 0.665 | efg    | 4.250 | bcd    | 0.770 | bc     | 4.250 | cde    |
| BE_23   |  | 1.426 | b      | 6.468 | ab     | 0.948 | ab     | 6.468 | ab     |
| BE_27   |  | 2.052 | a      | 7.911 | a      | 0.979 | a      | 7.911 | a      |

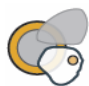

|     |    | e2_black |        |        | e2_gold |        |        | e5_black |        |          | e5_gold |        |        |
|-----|----|----------|--------|--------|---------|--------|--------|----------|--------|----------|---------|--------|--------|
|     | Df | Dev      | F      | P      | Dev     | F      | P      | Dev      | F      | P        | Dev     | F      | P      |
| hw  | 1  | 0.17     | 6.38   | 0.01   | 0.03    | 2.41   | 0.12   | 0.01     | 0.25   | 0.61     | 0.05    | 6.23   | 0.01   |
| G   | 3  | 4.66     | 57.16  | <2e-16 | 1.83    | 42.49  | <2e-16 | 3.62     | 85.83  | <2.2e-16 | 1.78    | 68.51  | <2e-16 |
| T   | 2  | 7.01     | 128.97 | <2e-16 | 3.78    | 131.92 | <2e-16 | 6.13     | 218.05 | <2.2e-16 | 3.24    | 186.45 | <2e-16 |
| GxT | 6  | 0.42     | 2.62   | 0.01   | 0.24    | 2.86   | 0.01   | 0.28     | 3.32   | 0.003    | 0.10    | 1.96   | 0.07   |

| HSD     |  | Means | Groups | Means  | Groups | Means  | Groups | Means  | Groups |
|---------|--|-------|--------|--------|--------|--------|--------|--------|--------|
| WT_19   |  | 0.069 | e      | -0.236 | de     | 0.214  | e      | -0.194 | g      |
| WT_23   |  | 0.312 | d      | -0.284 | bc     | 0.406  | d      | 0.099  | ef     |
| WT_27   |  | 0.530 | b      | 0.530  | d      | 0.478  | bc     | 0.198  | cd     |
| Choc_19 |  | 0.075 | e      | -0.663 | e      | 0.001  | e      | -0.134 | g      |
| Choc_23 |  | 0.314 | d      | -0.280 | bc     | 0.308  | cd     | 0.140  | def    |
| Choc_27 |  | 0.519 | bc     | -0.245 | b      | 0.379  | bc     | 0.188  | cde    |
| Fr_19   |  | 0.101 | de     | 0.101  | cd     | -0.213 | e      | 0.041  | f      |
| Fr_23   |  | 0.318 | cd     | 0.318  | b      | 0.140  | d      | 0.265  | bc     |
| Fr_27   |  | 0.637 | b      | -0.026 | a      | 0.273  | cd     | 0.359  | ab     |
| BE_19   |  | 0.300 | de     | -0.308 | bcd    | 0.315  | bcd    | 0.160  | cdef   |
| BE_23   |  | 0.668 | b      | -0.095 | ab     | 0.553  | ab     | 0.341  | abc    |
| BE_27   |  | 1.112 | a      | 0.075  | a      | 0.590  | a      | 0.476  | a      |

For each of the target eyespot rings (symbols), the tables display the results of the statistical tests for the effects of temperature (T), genotype (G), and GxT on **wing area** (model: wing\_area ~ Temperature \* Genotype; top table), and pairwise comparisons (Tukey HSD where same letters in column “Groups” correspond to pairs of values not significantly different with alpha=0.01; bottom table). Analyses were run separately for females **(a)** and males **(b)**.

### a) females

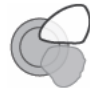

**forewing**

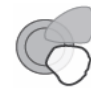

**hindwing**

|     | Df | Dev   | F     | P        | Dev   | F     | P        |
|-----|----|-------|-------|----------|-------|-------|----------|
| G   | 3  | 11695 | 3.83  | 0.01     | 34993 | 8.92  | 1.23e-05 |
| T   | 2  | 33935 | 16.68 | 1.40e-07 | 70406 | 26.93 | 2.62e-11 |
| GxT | 6  | 17024 | 2.79  | 0.01     | 8162  | 1.04  | 0.39     |

| HSD     | Means | Groups | Means | Groups |
|---------|-------|--------|-------|--------|
| WT_19   | 322.5 | ab     | 384.8 | a      |
| WT_23   | 317.6 | ab     | 368.1 | a      |
| WT_27   | 314.7 | ab     | 356.3 | abc    |
| Choc_19 | 338.8 | a      | 365.9 | ab     |
| Choc_23 | 341.6 | a      | 351.8 | abc    |
| Choc_27 | 296.6 | b      | 315.2 | c      |
| Fr_19   | 348.4 | a      | 364.7 | ab     |
| Fr_23   | 336.7 | a      | 336.7 | ab     |
| Fr_27   | 323.3 | ab     | 323.3 | bc     |
| BE_19   | 351.5 | a      | 351.5 | a      |
| BE_23   | 326   | ab     | 326   | abc    |
| BE_27   | 321   | ab     | 321   | bc     |

### b) males

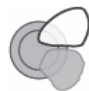

**forewing**

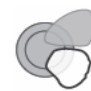

**hindwing**

|     | Df | Dev   | F     | P       | Dev  | F     | P        |
|-----|----|-------|-------|---------|------|-------|----------|
| G   | 3  | 8026  | 3.32  | 0.02    | 0.01 | 1.76  | 0.15     |
| T   | 2  | 35218 | 21.89 | 2.4e-09 | 0.13 | 25.71 | 1.52e-10 |
| GxT | 6  | 3798  | 0.78  | 0.58    | 0.01 | 1.18  | 0.31     |

| HSD     | Means | Groups | Means | Groups |
|---------|-------|--------|-------|--------|
| WT_19   | 290   | ab     | 2.517 | a      |
| WT_23   | 297   | a      | 2.492 | a      |
| WT_27   | 262.4 | b      | 2.424 | b      |
| Choc_19 | 291.9 | ab     | 2.491 | a      |
| Choc_23 | 283.7 | ab     | 2.468 | ab     |
| Choc_27 | 261.8 | b      | 2.434 | ab     |
| Fr_19   | 256.2 | ab     | 2.458 | ab     |
| Fr_23   | 275.3 | ab     | 2.460 | ab     |
| Fr_27   | 256.2 | b      | 2.419 | b      |
| BE_19   | 289.5 | ab     | 2.483 | ab     |
| BE_23   | 309.9 | a      | 2.513 | a      |
| BE_27   | 279.8 | ab     | 2.445 | ab     |
