# Supplementary material for: Developmental Plasticity in Butterfly Eyespot Mutants: Variation in Thermal Reaction Norms across Genotypes and Pigmentation Traits
Source: MDPI journal article supplement (doi:10.3390/insects13111000), 2022-10-31
Supplement: s1 [file s1]

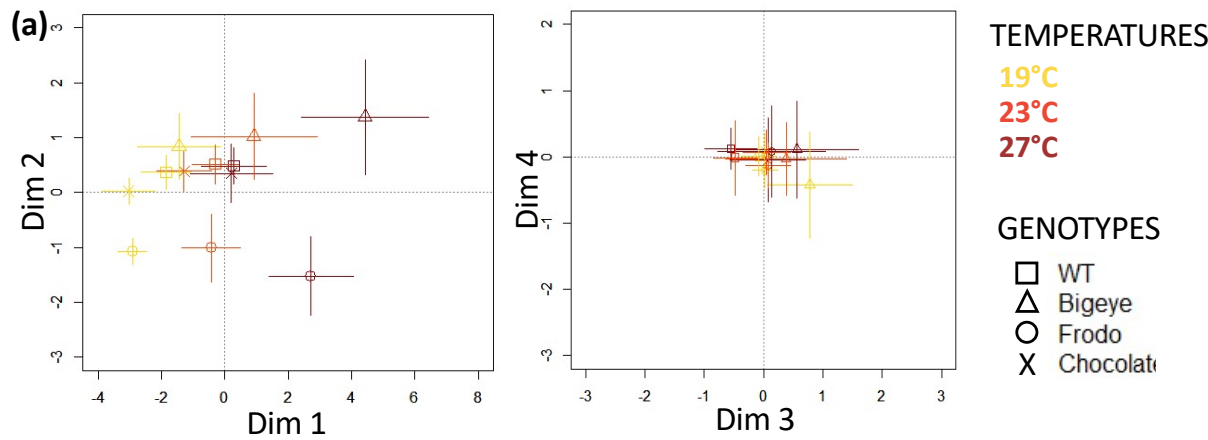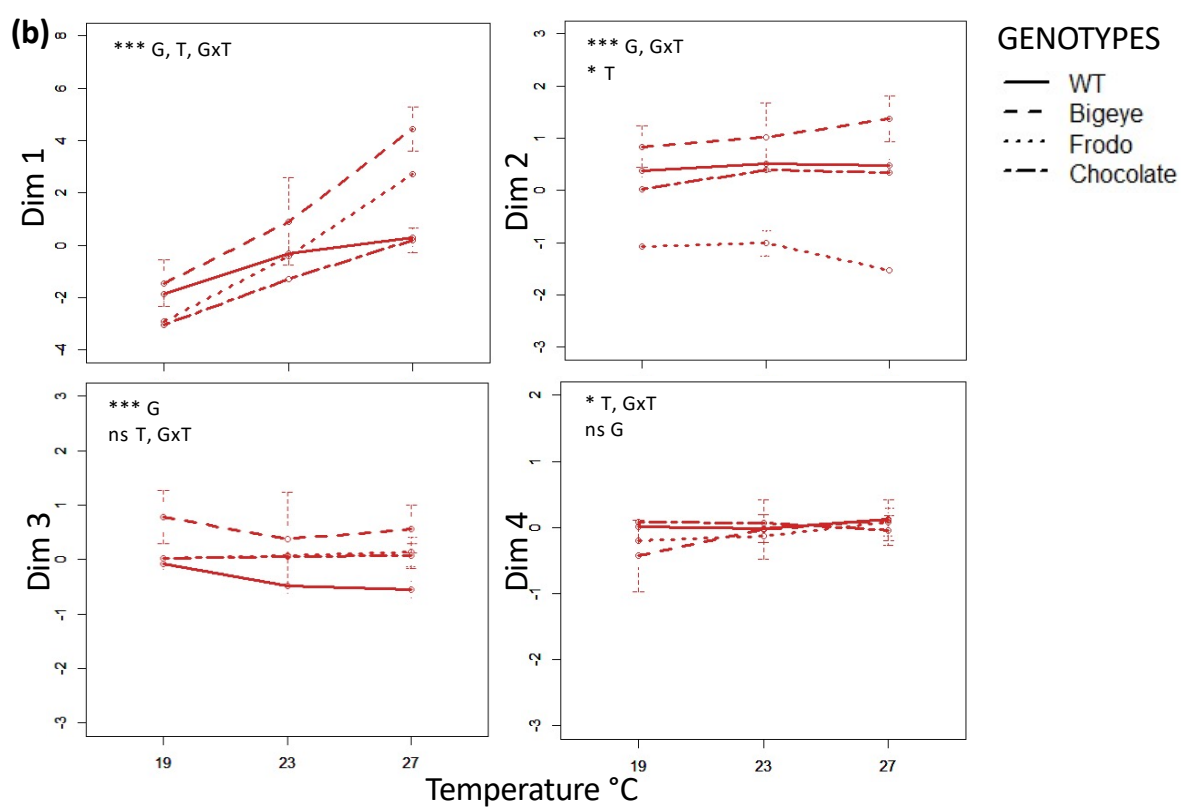

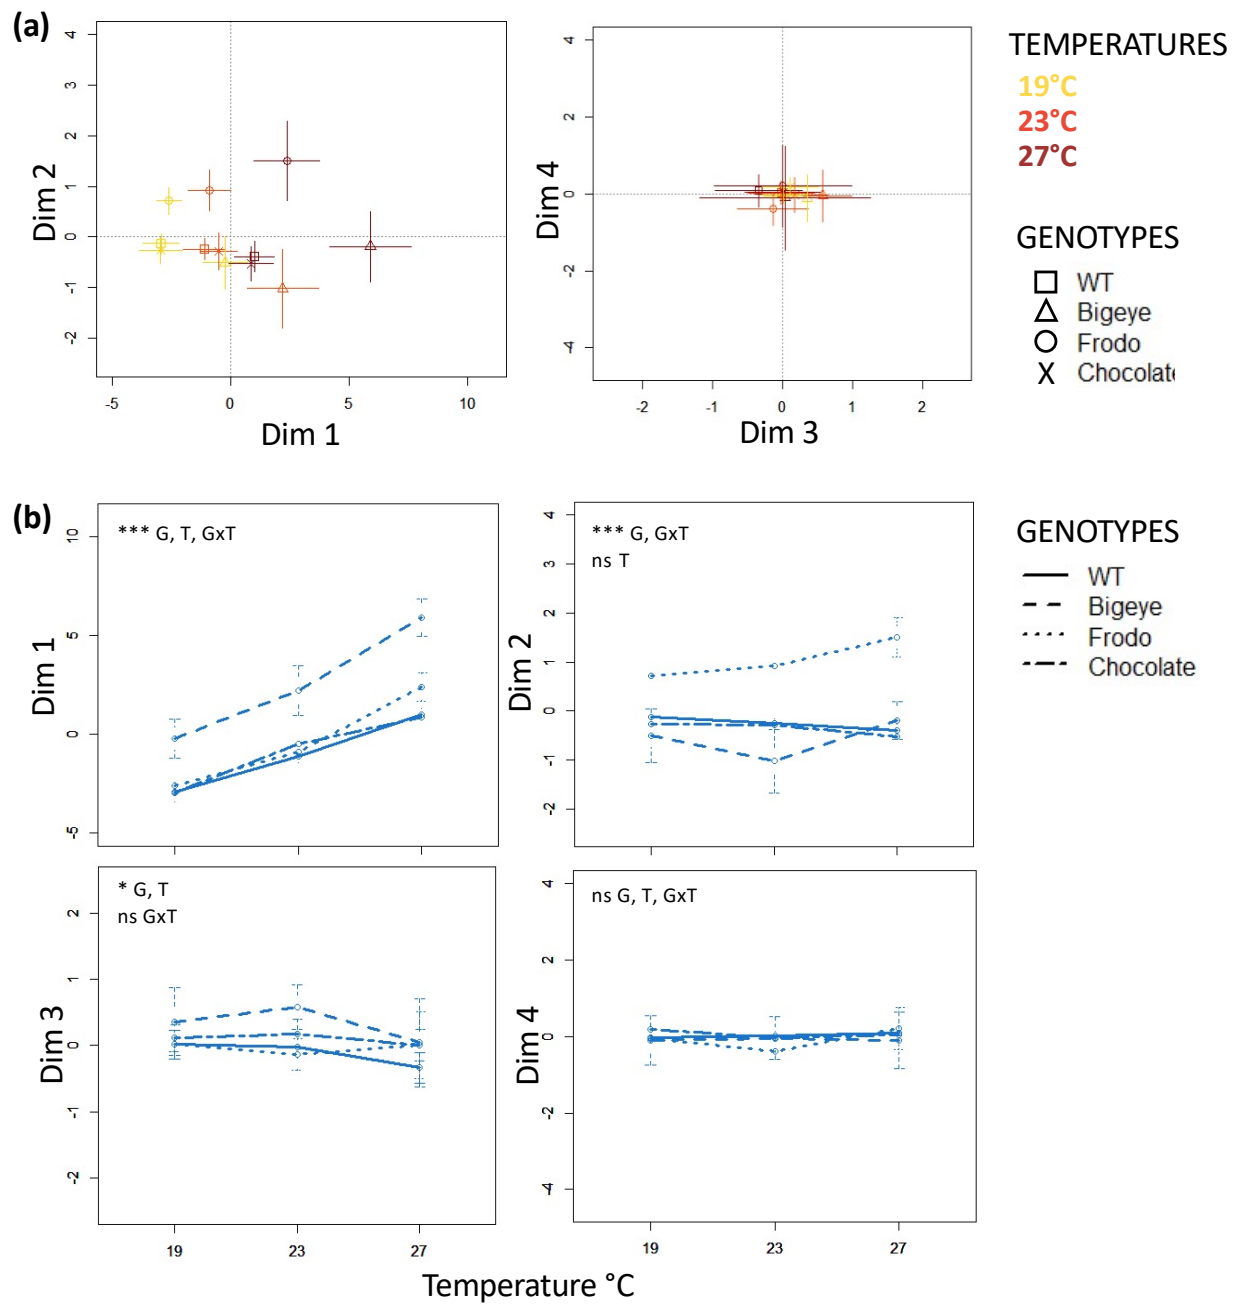

*Figure S3 - Principal component analysis (PCA) of eyespot ring area for different temperatures and genotypes. (a)* Distribution of mean values per temperature and genotype (legends to the right) for the four main principal components, Dims 1-4, showing what aspects of variation each Dim separates. *(b)* Mean values along Dims 1-4 (with bars representing standard deviation) as a function of developmental temperature (19, 23, or 27°C) for each of the four genotypes (WT, Fr, BE and Choc in different line styles; legend on bottom right corner) in females (S3i) and males (S3ii). We tested for the effect of temperature (T) and genotype (G) on each Dim (see Material and Methods). Statistical significance of effects of G, T, and GxT is represented with ns for non-significant ( $P>0.05$ ), \* for  $P<0.05$ , \*\* for  $P<0.01$ , \*\*\*  $P<0.001$ .

Results of the statistical tests for the effects of temperature (T), genotype (G), and GxT on each of the first four **Principal Components**, Dims 1-4, (model: Dim~Genotype\*Temperature; top table), and pairwise comparisons (Tukey HSD where same letters in column “Groups” correspond to pairs of values not significantly different with  $\alpha=0.01$ ; bottom table). Analyses were run separately for females (**a**) and males (**b**).

### a) females

|     | Df | Dev    | Dim 1  |          |        | Dev    | Dim 2    |       |       | Dev      | Dim 3 |      |      | Dev | Dim 4 |   |  |
|-----|----|--------|--------|----------|--------|--------|----------|-------|-------|----------|-------|------|------|-----|-------|---|--|
|     |    |        | F      | P        |        |        | F        | P     |       |          | F     | P    |      |     | F     | P |  |
| G   | 3  | 377.17 | 94.91  | <2.2e-16 | 233.26 | 258.73 | <2.2e-16 | 29.94 | 27.66 | 8.19e-16 | 0.53  | 0.69 | 0.55 |     |       |   |  |
| T   | 2  | 829.11 | 312.96 | <2.2e-16 | 1.88   | 3.13   | 0.04     | 1.58  | 2.19  | 0.11     | 1.41  | 5.51 | 0.01 |     |       |   |  |
| GxT | 6  | 154.04 | 19.38  | <2.2e-16 | 8.08   | 4.48   | 0.0002   | 3.78  | 1.74  | 0.10     | 2.48  | 3.21 | 0.02 |     |       |   |  |

| HSD     | Dim 1  |        | Dim 2  |        | Dim 3  |        | Dim 4  |        |
|---------|--------|--------|--------|--------|--------|--------|--------|--------|
|         | Means  | Groups | Means  | Groups | Means  | Groups | Means  | Groups |
| WT_19   | -1.852 | ef     | 0.370  | bc     | -0.082 | bc     | 0.008  | a      |
| WT_23   | -0.302 | cd     | 0.517  | bc     | -0.476 | bc     | -0.013 | a      |
| WT_27   | 0.277  | c      | 0.483  | bc     | -0.549 | c      | 0.124  | a      |
| Choc_19 | -3.036 | f      | 0.024  | c      | 0.022  | abc    | 0.088  | a      |
| Choc_23 | -1.290 | de     | 0.388  | bc     | 0.054  | abc    | 0.069  | a      |
| Choc_27 | 0.204  | c      | 0.350  | bc     | 0.071  | ab     | -0.049 | a      |
| Fr_19   | -2.917 | f      | -1.068 | de     | 0.023  | abc    | -0.198 | a      |
| Fr_23   | -0.431 | cd     | -1.008 | d      | 0.082  | ab     | -0.129 | a      |
| Fr_27   | 2.722  | b      | -1.520 | e      | 0.141  | ab     | 0.081  | a      |
| BE_19   | -1.447 | def    | 0.841  | ab     | 0.779  | a      | -0.425 | a      |
| BE_23   | 0.914  | c      | 1.025  | ab     | 0.379  | ab     | -0.029 | a      |
| BE_27   | 4.427  | a      | 1.377  | a      | 0.565  | a      | 0.112  | a      |

### b) males

|     | Df | Dev    | Dim 1  |          |   | Dev <sup>a</sup> | Dim 2     |   |      | Dev <sup>a</sup> | Dim 3 |      |      | Dev | Dim 4 |   |  |
|-----|----|--------|--------|----------|---|------------------|-----------|---|------|------------------|-------|------|------|-----|-------|---|--|
|     |    |        | F      | P        |   |                  | F         | P |      |                  | F     | P    |      |     | F     | P |  |
| G   | 3  | 440.34 | 146.62 | <2.2e-16 | - | 140.50           | <2.2e-16  | - | 3.11 | 0.02             | 1.10  | 1.06 | 0.36 |     |       |   |  |
| T   | 2  | 667.03 | 333.16 | <2.2e-16 | - | 1.32             | 0.26      | - | 3.43 | 0.03             | 1.33  | 1.93 | 0.14 |     |       |   |  |
| GxT | 6  | 36.93  | 6.14   | 6.02e-06 | - | 9.60             | 2.627e-09 | - | 0.96 | 0.45             | 2.59  | 1.24 | 0.28 |     |       |   |  |

<sup>a</sup>: For Dims 2 and 3 we used the model: ((Dim+3) ^lambda - 1)/lambda ~Genotype\*Temperature. With this model we have no Deviance.

| HSD     | Dim 1  |        | Dim 2 |        | Dim 3 |        |
|---------|--------|--------|-------|--------|-------|--------|
|         | Means  | Groups | Means | Groups | Means | Groups |
| WT_19   | -2.929 | f      | 1.522 | c      | 1.618 | a      |
| WT_23   | -1.103 | e      | 1.441 | c      | 1.592 | a      |
| WT_27   | 1.015  | cd     | 1.336 | c      | 1.358 | a      |
| Choc_19 | -2.943 | f      | 1.424 | c      | 1.682 | a      |
| Choc_23 | -0.501 | e      | 1.407 | c      | 1.725 | a      |
| Choc_27 | 0.867  | cd     | 1.231 | cd     | 1.606 | a      |
| Fr_19   | -2.596 | f      | 2.082 | b      | 1.619 | a      |
| Fr_23   | -0.892 | e      | 2.210 | ab     | 1.507 | a      |
| Fr_27   | 2.378  | b      | 2.565 | cd     | 1.582 | a      |
| BE_19   | -0.230 | de     | 1.241 | cd     | 1.846 | a      |
| BE_23   | 2.210  | bc     | 0.825 | d      | 1.995 | a      |
| BE_27   | 5.903  | a      | 1.456 | c      | 1.572 | a      |
