# Supplementary material for: Developmental Plasticity in Butterfly Eyespot Mutants: Variation in Thermal Reaction Norms across Genotypes and Pigmentation Traits
Source: Insects. 2022 Oct 31;13(11):1000. doi: 10.3390/insects13111000 (PMC9699518; doi:10.3390/insects13111000)
Supplement: Supplementary file 1 [file insects-13-01000-s001.zip]

Archive with 4 entries (4 files):
- File S1.xlsx
- File S2.pdf
- File S3.pdf
- File S4.pdf
