# Supplementary material for: Developmental Plasticity in Butterfly Eyespot Mutants: Variation in Thermal Reaction Norms across Genotypes and Pigmentation Traits
Source: Insects. 2022 Oct 31;13(11):1000. doi: 10.3390/insects13111000 (PMC9699518; doi:10.3390/insects13111000)
Supplement: Supplementary file 1 [file insects-13-01000-s001.zip › File S1.xlsx]

## Sheet: stocks
Temperature	Genotype	ID	Sex	eA_black	eA_gold	eP_black	eP_gold	forewing	e2_black	e2_gold	e5_black	e5_gold	hindwing	Dim.1	Dim.2	Dim.3	Dim.4
19	Frodo	1003	M	0.0987	1.2102	1.227	2.6908	302.4533	0.0971	0.5666	0.6733	1.6901	315.6562	-3.67878688	-1.57E-01	6.24E-01	-4.25E-02
19	Frodo	1017	M	0.1396	0.6765	1.0938	2.3297	306.9056	0.0498	0.3306	0.5569	0.8707	329.1937	-3.95852995	-1.53E-01	-3.37E-01	2.73E-01
19	Frodo	1031	M	0.0978	0.7417	1.1441	2.7632	294.9059	0.0631	0.3314	0.3819	1.0471	314.6099	-3.66469063	-1.24E-01	-2.99E-01	1.06E-01
19	Frodo	1032	M	0.1815	0.9895	1.6295	3.7214	279.6759	0.2351	0.5571	0.7646	1.1828	291.4263	-3.2949943	-3.66E-01	2.51E-01	1.29E-01
19	Frodo	1046	M	0.3279	0.7873	1.3604	3.0958	250.9395	0.1023	0.4497	0.6355	1.0657	279.5229	-2.14310634	2.29E-01	1.96E-01	-3.92E-01
19	Frodo	1124	M	0.1787	0.8567	1.2765	2.3361	271.4491	0.1194	0.4721	0.6	1.115	261.8458	-1.45653852	-2.44E-01	3.51E-01	-4.01E-01
19	Frodo	1155	M	0.194	0.9204	1.6226	2.4148	300.0219	0.0657	0.3474	0.668	1.4805	319.7563	-2.04665719	-2.86E-01	-5.25E-01	-4.86E-02
19	Frodo	1156	M	0.2241	0.6091	1.1181	3.6312	296.2339	0.1057	0.3361	0.8096	1.2238	281.8386	-2.63967797	-4.03E-01	-4.23E-02	-8.53E-02
19	Frodo	1182	M	0.2167	1.1015	1.1242	3.7118	294.1673	0.2906	0.5422	1.0381	1.4537	305.478	-2.85431009	4.53E-02	3.41E-01	-1.27E-01
19	Frodo	2469	M	0.1114	0.389	0.7818	1.9697	230.0708	0.0408	0.5301	0.4299	0.8635	261.4995	-2.65070705	-7.31E-02	-1.53E-01	2.22E-01
19	Frodo	2470	M	0.0808	0.7249	1.2977	2.1063	285.465	0.0463	0.1616	0.5281	1.1046	286.6753	-3.41804717	-6.37E-02	-1.80E-01	5.38E-02
19	Frodo	527	M	0.1741	0.752	1.2704	3.1876	274.3783	0.065	0.39	0.39	0.6966	268.7446	-3.34009856	6.08E-02	-4.07E-02	8.61E-02
19	Frodo	886	M	0.2006	0.375	1.2917	2.6127	236.1111	0.044	0.314	0.5208	0.8812	253.75	-1.76763898	2.57E-02	-2.10E-01	-1.52E-01
19	Frodo	988	M	0.0955	0.7188	1.1331	4.148	304.6348	0.1602	0.5365	0.5397	0.9831	301.0365	-1.67591064	-2.68E-01	3.82E-02	2.21E-01
19	Frodo	2481	M	0.3858	0.8687	0.7669	1.9623	263.7167	0.0641	0.4115	0.6153	1.2208	254.0304	-1.27413444	-4.13E-01	-6.55E-02	1.45E-01
19	Frodo	995	M	0.5406	1.0454	2.3677	5.7094	298.6388	0.1469	0.6079	1.0016	1.2532	309.9999	-2.29032887	-8.09E-02	-2.44E-01	1.29E-01
19	Frodo	996	M	0.0921	0.593	1.296	2.1465	259.7828	0.0312	0.259	0.6468	1.0112	260.6801	-0.96085419	-4.04E-01	2.89E-01	-2.73E-04
19	Frodo	341	M	0.0884	0.5066	0.823	2.5447	260.1408	NA	NA	NA	NA	NA	-0.17846219	2.51E-01	-9.13E-01	-2.34E-01
19	Frodo	399	F	0.1594	0.8861	2.1628	6.3652	331.224	NA	NA	NA	NA	NA	-1.365321	-5.30E-01	4.83E-01	-4.76E-02
19	Frodo	524	F	0.4845	0.9445	3.0189	5.3316	371.7334	0.0892	0.3472	1.0281	1.4005	379.9899	-1.76632118	-5.30E-02	6.19E-02	9.06E-02
19	Frodo	983	F	0.2007	0.3678	2.2512	5.1754	353.3958	0.0511	0.3251	0.6105	0.86	360.9917	-2.14627811	-2.99E-01	-1.82E-01	-4.57E-02
19	Frodo	987	F	0.1875	0.5664	1.8056	5.1489	308.0679	0.0154	0.2677	0.6435	1.2369	357.6481	-1.33155115	-2.38E-01	-3.73E-01	-2.52E-01
19	Frodo	1015	F	0.2446	1.1141	4.6317	7.8218	360.8075	0.1831	0.4434	1.04	1.7856	381.77	-1.76776589	1.13E-01	2.98E-02	-1.71E-01
19	Frodo	1105	F	0.2722	1.3043	2.6449	6.5782	346.7247	NA	NA	NA	NA	NA	-1.83464238	-3.83E-01	3.63E-01	5.21E-02
19	Frodo	1106	F	0.2743	0.9708	2.5454	7.1412	396.4513	0.0657	0.3125	1.1339	1.6404	378.3857	-0.29072138	-2.05E-01	-2.43E-01	6.25E-02
19	Frodo	1132	F	0.3358	1.1125	2.5287	7.9425	339.3108	0.0903	0.5698	0.7857	1.5427	341.241	-0.11537641	-2.64E-01	1.78E-01	-1.06E-01
19	Frodo	1180	F	0.3274	0.8651	2.56	7.4048	334.1725	NA	NA	NA	NA	NA	0.8557404	-2.68E-02	9.76E-01	1.01E+00
19	Frodo	1227	F	0.2456	0.9221	2.3393	6.7315	343.988	0.0369	0.2303	0.7921	1.2808	348.5142	-0.35041022	-3.36E-01	-5.23E-01	-1.02E-02
19	Frodo	1248	F	0.2979	0.9984	2.901	6.228	376.8029	0.0779	0.2532	0.7467	1.3815	376.0976	-1.27623973	-3.46E-01	-5.95E-01	-1.43E-02
19	Frodo	2474	F	0.2225	0.9642	2.1541	7.2016	338.5684	0.0529	0.3243	0.1191	0.8766	374.6402	0.20723932	-3.25E-03	-5.00E-01	-2.26E-01
19	Frodo	307	F	0.3156	1.2491	3.6154	6.2942	341.0436	0.0333	0.4198	1.1993	2.016	374.8461	0.12297679	-7.15E-02	-1.54E-01	1.45E-01
19	Frodo	1180	F	0.3837	0.887	2.6111	7.3458	352.864	0.152	0.4161	NA	0.916	345.5057	-1.82157371	-5.80E-01	-6.14E-01	-5.53E-01
19	Frodo	1181	F	0.1552	1.0197	2.179	7.2709	336.8281	0.0238	0.257	0.3465	0.8965	370.8147	-0.62995341	-9.17E-02	-8.59E-02	-2.80E-01
19	Frodo	1121	F	0.6051	1.4453	3.5407	7.3582	398.6871	NA	NA	NA	NA	NA	-1.59635382	-2.45E-01	-2.22E-01	-3.55E-01
19	Frodo	1123	F	0.1867	0.9261	2.3068	5.2418	341.9461	NA	NA	NA	NA	NA	-2.67497547	-2.18E-01	2.98E-01	4.66E-02
19	Frodo	308	F	0.2776	0.6842	1.9188	5.3425	318.4706	0.0609	0.3117	0.5049	1.0284	318.8692	-1.3970443	-3.63E-01	-1.60E-01	1.05E-01
19	Frodo	337	F	NA	NA	NA	NA	NA	0.0601	0.3776	0.9027	1.7712	387.1477	-2.00013556	-4.31E-01	3.53E-01	1.84E-01
19	Frodo	374	F	0.2612	0.6991	3.0244	5.0144	361.1665	0.0379	0.2162	0.7804	1.141	373.8448	-0.61811511	-6.17E-01	6.33E-01	-1.55E-01
19	Frodo	399	F	0.187	0.7291	2.1083	6.6713	316.072	NA	NA	NA	NA	NA	-0.71392674	-1.77E-01	-4.40E-02	2.17E-01
23	Frodo	1976	M	0.4229	1.1075	2.9059	3.6932	269.1242	NA	NA	NA	NA	NA	-0.09810209	-4.37E-01	1.27E+00	5.15E-01
23	Frodo	2369	M	0.2462	1.0273	2.1257	2.5494	284.5048	0.2635	0.5736	1.3216	1.6523	294.9691	-0.47643681	-1.33E-01	1.06E-01	4.51E-01
23	Frodo	2372	M	0.4329	1.2091	2.6327	3.3966	300.5278	0.3194	0.6574	1.6119	2.0563	328.7878	-1.86668418	-4.28E-01	-4.46E-01	1.34E-01
23	Frodo	2390	M	0.2616	1.2384	2.706	3.571	317.3333	0.2917	0.5401	1.6373	2.152	298.5903	1.2642356	-2.49E-01	-1.17E+00	3.91E-01
23	Frodo	2442	M	0.8211	1.9032	2.4732	4.0246	298.0678	0.5983	0.7349	1.7261	2.1726	305.6302	-0.74284904	-4.03E-01	-1.28E-01	-3.58E-01
23	Frodo	2108	M	0.2871	0.8614	2.8581	3.3192	214.1775	0.1912	0.5118	1.1134	1.5012	244.9986	1.40560084	-2.42E-01	-5.38E-01	8.73E-01
23	Frodo	2119	M	0.0828	0.5081	1.9837	3.6911	233.9209	0.0568	0.4071	1.1331	1.5702	237.8259	0.68482633	1.97E-01	-1.83E-01	5.75E-01
23	Frodo	2175	M	0.9919	2.1018	2.9452	3.4299	295.5669	0.6252	1.0585	1.5159	2.6643	307.8558	0.10749812	-6.10E-01	-5.10E-01	3.89E-02
23	Frodo	2176	M	0.6429	0.8312	1.8109	3.5893	295.4521	0.3815	0.7816	1.7532	1.5706	361.1221	0.38552117	-6.09E-01	-2.79E-01	7.43E-01
23	Frodo	2183	M	0.3642	0.7353	2.429	3.466	274.9444	0.3904	0.5741	1.3364	1.7739	248.1968	0.08358733	3.58E-01	6.25E-02	-6.94E-03
23	Frodo	2184	M	0.6718	0.7943	2.5998	3.675	262.96	0.1927	0.6094	1.7259	2.0489	286.0086	0.95103605	9.95E-02	-2.69E-01	-1.99E-01
23	Frodo	2206	M	0.2161	0.7522	1.7649	3.2435	241.5046	0.0343	0.4432	1.1353	1.4403	274.8822	0.58083156	-6.31E-01	-7.70E-01	-1.61E-01
23	Frodo	2210	M	0.7243	1.137	2.5312	3.9563	259.5158	0.5957	1.0194	1.2277	1.9592	266.2337	0.88121304	-8.10E-01	-1.07E+00	-1.51E-01
23	Frodo	2212	M	0.317	1.8458	2.7943	4.4796	282.0061	0.4077	0.7961	1.7045	2.4757	301.967	0.97542972	-2.42E-01	5.74E-01	8.04E-01
23	Frodo	2285	M	0.317	0.8133	1.5687	3.6129	262.9024	NA	NA	NA	NA	NA	1.6074198	3.65E-02	-1.81E-01	3.94E-01
23	Frodo	2278	M	0.2408	0.8068	2.211	4.7686	308.03	0.2784	0.6899	1.7881	1.8961	294.9757	1.0349839	-5.23E-01	1.21E+00	-1.01E-01
23	Frodo	2360	M	0.3685	1.1737	0.8993	5.6688	284.1146	NA	NA	NA	NA	NA	1.533878	-5.13E-01	2.12E-01	-2.43E-01
23	Frodo	2362	M	0.2127	0.974	1.7273	3.7987	270.9036	0.1136	0.4821	0.5179	0.9943	281.1016	-0.37139435	-2.46E-01	-6.92E-01	3.48E-01
23	Frodo	2368	M	0.4253	0.8451	2.274	5.0207	256.5017	0.3503	0.7038	1.7272	2.3474	306.7794	0.89867174	-3.95E-01	-2.75E-01	3.51E-01
23	Frodo	2369	M	0.3338	0.9397	2.0002	2.8934	293.2111	NA	NA	NA	NA	NA	-0.30276183	-5.76E-01	1.17E-01	-4.11E-01
23	Frodo	1918	F	0.4069	1.223	4.8712	8.8782	363.1965	NA	NA	NA	NA	NA	1.86010166	-1.63E-01	-2.45E-01	-8.22E-01
23	Frodo	2000	F	0.3677	1.212	4.1448	8.2928	331.4544	0.1917	0.7559	1.6428	1.8795	333.8972	1.86211556	-5.06E-01	-2.79E-01	-1.57E-01
23	Frodo	2042	F	0.6478	2.2235	4.634	11.2975	334.7526	0.5728	0.7622	1.1323	2.7285	348.7296	1.46323572	-3.26E-01	2.71E-01	1.78E-01
23	Frodo	2043	F	0.3595	1.3699	4.8231	7.6985	331.0555	NA	NA	NA	NA	NA	1.22037267	-1.55E-01	-6.86E-01	1.39E-01
23	Frodo	2046	F	0.7498	3.2653	5.0755	10.1479	322.7459	0.6648	1.3022	2.0552	3.2006	363.6021	2.67567862	-5.87E-01	-1.46E+00	1.25E-01
23	Frodo	2050	F	0.5026	2.3632	3.6548	8.3102	334.0298	0.3227	0.7756	1.5607	2.7111	361.1263	1.47552183	-9.26E-01	-7.54E-01	-7.85E-01
23	Frodo	2073	F	0.5883	1.4606	5.2316	8.2582	331.6033	0.3769	0.5836	1.857	2.5686	349.0169	1.56990256	-8.10E-01	7.10E-01	-1.64E-01
23	Frodo	2074	F	0.5121	2.2677	5.0475	8.7221	349.0539	0.6423	0.9768	1.6041	2.5573	357.7326	1.90209834	-4.37E-02	-1.33E+00	1.57E-01
23	Frodo	2105	F	0.666	1.2451	5.9091	9.4914	346.6229	0.2556	0.5326	2.0476	2.2914	343.1779	0.55292121	-3.91E-01	-6.09E-01	2.52E-01
23	Frodo	2120	F	0.6886	2.0424	2.9308	8.8388	308.5491	0.3579	0.6324	1.1524	1.796	341.1591	1.10126723	-4.77E-01	-1.56E+00	-1.67E-01
23	Frodo	2143	F	0.5465	0.7985	5.8278	8.7145	356.5649	0.2248	0.6115	2.5424	2.8746	433.2785	-0.58843716	-5.24E-01	1.88E-01	-8.40E-02
23	Frodo	2196	F	NA	NA	3.7999	NA	332.4154	0.5973	1.0636	1.7864	3.8458	362.3887	1.61675267	-7.70E-01	-5.81E-01	1.90E-01
23	Frodo	2198	F	0.6613	1.4452	4.2176	7.4483	304.0216	0.2685	0.5787	1.1721	2.1196	312.3194	1.29806002	-2.97E-01	-1.29E-01	6.89E-01
23	Frodo	2200	F	0.8483	1.6259	4.4162	7.5764	318.7266	0.4064	0.6825	1.657	2.3616	343.8628	2.47781918	-6.37E-01	-1.04E-01	4.36E-01
23	Frodo	2214	F	0.774	2.244	4.234	9.6452	309.1986	0.6896	0.9255	1.9261	3.385	346.8817	-0.48244846	-2.14E-01	3.48E-01	-2.40E-01
23	Frodo	2215	F	0.8806	2.4871	6.4741	9.6097	347.8349	0.546	0.7756	2.6859	3.8292	369.7687	-2.15457135	-4.71E-01	-4.60E-01	1.74E-01
23	Frodo	2216	F	0.7223	1.3282	5.2412	8.7281	300.8017	0.2849	0.7303	1.4309	2.2141	350.5686	-4.0967939	-3.98E-01	-2.46E-01	2.65E-01
23	Frodo	2217	F	0.9399	2.4975	5.5527	11.491	356.9971	0.7135	0.9586	2.1063	3.3352	374.0424	-4.10627685	-3.22E-01	-1.18E-01	2.92E-01
23	Frodo	2218	F	0.4992	1.7159	4.211	8.5311	363.1965	0.4392	0.5616	1.3259	2.2561	373.3877	-2.47588407	-5.45E-01	8.41E-01	-3.64E-02
23	Frodo	2373	F	0.7295	1.6299	6.4207	10.1183	346.7776	0.6187	0.9761	1.9452	2.9119	367.4979	-3.20485806	-2.80E-01	-5.72E-02	3.29E-01
23	Frodo	2083	F	0.711	1.0176	6.3013	7.1977	339.5389	NA	NA	NA	NA	NA	-2.25060863	-4.92E-01	6.15E-01	5.60E-01
23	Frodo	2173	F	0.4374	1.1757	3.7999	10.1183	288.7954	NA	NA	NA	NA	NA	-3.11348985	-3.72E-01	2.33E-02	5.27E-01
23	Frodo	2386	F	0.7014	1.4967	3.3376	8.7345	367.1195	0.3692	0.7495	1.7575	2.7646	403.9869	-4.09701433	-4.04E-01	5.40E-02	3.68E-01
23	Frodo	2397	F	0.8669	1.0955	6.274	6.5026	350.8458	0.4455	0.5142	1.2429	1.6331	385.2689	-2.8480632	1.53E-01	9.78E-01	-1.77E-01
23	Frodo	2399	F	0.4505	0.9287	6.5632	7.5417	358.4088	0.3432	0.5279	2.5494	2.6693	406.9057	-2.84573216	-4.84E-01	-4.26E-01	1.47E-01
23	Frodo	2400	F	0.9113	2.0332	5.5833	7.6034	368.6343	0.5756	0.8148	2.2238	3.0532	387.3009	-2.82124212	3.79E-01	1.69E-01	2.22E-01
23	Frodo	2440	F	0.9333	1.2755	4.9262	7.9583	329.1308	0.4366	0.5813	2.0046	2.1732	400.7528	-3.44806101	-3.62E-02	-1.81E-02	-1.16E-01
27	Frodo	1404	M	0.9547	1.3848	3.6714	3.9799	254.5133	0.4261	0.8388	1.7067	2.3545	247.8696	-3.29770003	1.63E-01	2.46E-01	3.32E-01
27	Frodo	1421	M	1.0015	4.4981	4.1851	4.4981	192.2558	0.24	0.975	1.5729	2.2157	223.7447	-2.88419723	-2.88E-01	-1.27E-01	-2.34E-02
27	Frodo	1441	M	0.9811	1.7512	3.0336	4.3128	255.6219	0.7964	0.9138	1.7619	2.1428	252.346	-1.67847421	-3.54E-01	4.52E-01	5.39E-01
27	Frodo	1444	M	1.5609	2.3883	5.2548	5.4805	268.5189	1.2313	0.9935	2.392	2.5527	281.2623	-3.6146771	-4.44E-01	-8.17E-02	2.47E-01
27	Frodo	1451	M	0.4943	1.1526	4.073	4.7004	278.876	0.4375	0.9375	2.138	2.3027	294.901	-3.54794464	-3.57E-01	-1.84E-01	-1.34E-02
27	Frodo	1452	M	1.1092	2.1946	4.6732	5.8924	237.1081	0.656	0.9918	2.5123	1.7758	228.4267	0.60779812	-1.76E-01	9.46E-02	8.28E-01
27	Frodo	1453	M	1.1139	2.0576	3.6972	5.0943	256.5144	0.7979	1.198	2.013	2.1225	281.4084	0.15792655	-1.64E-01	-4.89E-01	6.65E-01
27	Frodo	1487	M	1.2053	1.9156	5.1217	4.4797	223.2961	0.6526	0.8685	2.2135	1.7256	237.0354	1.24857831	-5.44E-01	3.93E-01	2.79E-01
27	Frodo	1547	M	0.651	2.0768	3.7764	4.5875	248.6902	NA	NA	NA	NA	NA	-0.25248387	-1.47E-01	4.11E-01	4.18E-01
27	Frodo	1549	M	0.5583	2.5074	4.4162	6.9228	268.084	0.6683	1.1092	1.812	2.9179	273.5446	-0.57228309	5.75E-01	5.03E-01	-5.34E-01
27	Frodo	1550	M	0.5479	1.5349	2.2865	3.4821	239.7805	0.4075	0.9115	1.7719	2.4148	282.0513	-1.19608457	2.95E-01	-7.30E-01	-1.37E-01
27	Frodo	1551	M	0.677	1.9702	4.0565	4.5591	244.7371	0.5097	0.7677	1.4416	2.1107	229.5094	-1.39715926	-3.74E-01	9.28E-01	-7.74E-01
27	Frodo	1738	M	0.894	3.022	7.9157	9.4488	302.6133	NA	NA	NA	NA	NA	-1.19462653	-3.79E-01	-3.27E-01	-5.41E-02
27	Frodo	1741	M	1.138	3.5552	8.168	13.5746	343.4193	0.9562	1.3945	3.4131	3.7597	366.2495	-0.15017666	2.79E-01	-3.86E-01	-6.25E-01
27	Frodo	1806	M	0.6924	1.8807	2.698	3.2061	250.1132	0.4261	0.7816	1.3328	2.2337	254.1505	-0.27128129	-8.52E-03	7.41E-01	1.26E-02
27	Frodo	1849	M	0.5056	1.3576	3.8669	4.282	257.8501	0.5095	0.7428	1.5301	1.9545	259.6205	0.19907865	-8.58E-02	3.53E-01	3.82E-01
27	Frodo	1850	M	1.0569	3.1635	3.5407	5.1329	234.1011	0.8515	0.894	1.4517	2.3201	250.9273	-0.42847839	-5.20E-01	-1.99E-01	-2.01E-01
27	Frodo	1311	F	4.0825	4.0825	6.4346	12.4645	304.922	0.8017	1.2427	3.2619	4.1164	310.8698	-1.65446678	-7.16E-01	4.05E-01	-1.57E-01
27	Frodo	1312	F	3.2606	3.2606	4.3921	10.9928	275.9552	0.719	0.9502	2.3217	3.7357	297.3934	-1.74795077	-5.12E-01	7.81E-01	1.28E-02
27	Frodo	1313	F	2.6413	2.6413	5.0153	9.812	291.934	0.6934	0.8371	2.5272	3.5558	308.5576	-0.5245833	-5.14E-01	-3.61E-01	-3.25E-01
27	Frodo	1382	F	NA	NA	NA	NA	NA	0.6431	0.9547	2.7388	3.6043	282.3507	-0.23423845	-5.70E-01	6.56E-01	-9.60E-02
27	Frodo	1383	F	0.9534	1.8418	5.2789	7.0701	297.1214	0.6484	0.9333	2.3289	5.303	285.8493	-0.99820347	-4.03E-01	-9.02E-02	4.31E-01
27	Frodo	1384	F	1.662	4.6297	9.6117	11.9582	330.7402	0.8771	1.1275	3.0552	3.2333	335.1291	-1.44638327	-3.44E-01	3.54E-01	-4.17E-01
27	Frodo	1385	F	1.1872	2.6576	7.7889	11.2856	303.4261	0.89	1.119	2.83	3.3768	320.2166	-0.27726158	-6.22E-01	4.88E-02	4.58E-01
27	Frodo	1386	F	0.7037	2.5738	6.1737	8.3165	240.2269	0.6493	0.7549	2.1242	2.776	251.364	0.10498058	-7.68E-01	4.77E-01	-7.05E-01
27	Frodo	1407	F	0.9476	1.823	7.2744	9.4262	331.2111	0.3779	0.7358	2.2216	2.4757	354.6014	0.15583951	-1.24E-01	-4.71E-01	3.96E-01
27	Frodo	1408	F	1.0607	3.1535	6.2602	8.7019	253.906	0.8924	0.9893	2.8144	3.1995	281.7243	1.37954051	-1.63E-01	5.86E-01	7.17E-01
27	Frodo	1440	F	1.4662	3.3015	8.2201	11.4574	313.5079	0.9775	0.9783	3.901	4.6473	376.3982	1.50551513	-5.95E-01	-4.10E-01	1.58E-01
27	Frodo	1446	F	0.6867	3.1363	5.6039	9.6793	274.0838	0.7232	0.8222	2.3076	3.1826	273.3728	1.64773828	-6.65E-01	1.83E-01	7.32E-01
27	Frodo	1458	F	0.7004	2.3961	6.6144	12.2878	358.7035	0.057	0.9089	2.0833	6.2339	305.2903	2.71484186	-6.34E-01	-2.05E-01	3.22E-01
27	Frodo	1465	F	1.0689	2.7872	7.9421	10.7052	337.2505	0.588	1.2225	2.7282	6.3907	340.6639	1.30966947	-1.11E+00	-4.87E-01	1.48E-01
27	Frodo	1518	F	1.1962	2.8949	7.5008	10.4548	337.1401	0.2135	1.757	3.2241	5.4417	306.766	1.13194495	-3.38E-01	-8.88E-02	-1.32E-01
27	Frodo	1519	F	1.9783	3.3195	10.1703	11.8222	360.6906	0.9136	1.2748	2.7656	4.0445	379.3471	1.0739865	-7.42E-01	1.10E-01	-4.58E-01
27	Frodo	1521	F	1.4421	4.2429	5.5799	9.6566	286.7514	0.8531	1.1709	2.3754	4.1297	292.6988	1.15452617	-1.38E+00	3.16E-01	1.70E-03
27	Frodo	1522	F	1.1932	5.1328	8.5646	16.4548	342.9421	NA	NA	NA	NA	NA	-1.7209281	-5.17E-01	1.96E-01	3.32E-01
27	Frodo	1523	F	0.6935	2.3611	6.9878	11.2143	336.7223	0.3081	0.8156	3.0064	3.5928	339.4098	1.27277605	-4.16E-01	-5.67E-01	4.92E-01
27	Frodo	1556	F	1.4902	4.5535	8.0576	13.1208	337.8041	0.9066	1.5698	3.4074	5.3043	343.4193	0.08637534	-6.38E-01	6.07E-01	-2.04E-01
27	Frodo	1557	F	0.5292	3.0698	4.4326	12.0234	300.6721	0.4602	1.3003	2.2402	3.5755	331.3098	1.2599404	-1.80E-01	3.16E-01	1.10E+00
27	Frodo	1558	F	1.6141	5.7865	8.3193	13.6263	379.658	0.7594	1.6584	2.6363	4.2216	389.4352	1.311159	-5.54E-01	-2.27E-01	-2.99E-01
27	Frodo	1600	F	0.5988	1.6914	3.8233	9.4313	277.5972	0.4174	0.9761	2.0556	2.1744	274.527	0.75034772	-6.35E-01	-6.24E-01	-3.02E-01
27	Frodo	1705	F	1.0566	3.3678	6.7939	13.1542	321.2387	0.6043	1.2241	2.9368	4.1289	355.7614	0.01122519	1.04E-06	-5.54E-07	-3.89E-07
27	Frodo	1708	F	1.0279	3.2627	7.0344	12.1657	303.2783	NA	NA	NA	NA	NA	-0.18243424	-7.87E-01	4.37E-01	-6.44E-01
27	Frodo	1713	F	0.3818	1.8883	5.1839	6.8497	324.884	0.6757	1.0993	2.4031	3.2463	360.0874	0.6335249	-3.91E-01	-3.10E-01	3.10E-01
27	Frodo	1732	F	1.22	2.3801	9.0287	12.7519	359.3419	0.9195	0.9425	3.8103	4.6363	356.621	2.20920646	-2.05E-01	-7.98E-01	1.59E-01
27	Frodo	1734	F	1.0946	2.7542	6.4578	9.8227	334.9902	0.6372	0.9879	2.0175	2.9139	311.9269	0.03112137	-8.81E-01	1.54E-01	-8.70E-01
27	Frodo	1739	F	1.5207	5.2854	9.4871	14.3387	342.1616	1.0143	1.8898	2.9275	6.1936	355.5015	1.18831267	-4.64E-02	1.60E+00	-2.63E-01
27	Frodo	1767	F	0.8918	2.5748	6.4043	10.041	309.7906	0.362	1.7805	2.4258	4.2297	320.8748	0.15069124	-6.21E-01	-1.77E-01	-6.08E-01
27	Frodo	1769	F	0.7346	2.3872	6.5495	9.9001	307.4001	0.4383	1.0909	2.9261	4.7126	326.2384	-2.30656178	1.34E+00	-1.61E-01	2.54E-02
27	Frodo	1773	F	0.8261	3.3463	3.9886	8.2652	282.7247	0.3527	1.3303	1.7312	3.2674	297.4277	-3.35141753	3.45E-01	-9.97E-02	2.29E-01
27	Frodo	1775	F	0.9344	3.2469	7.179	12.3912	329.9614	NA	NA	NA	NA	NA	-3.15123608	6.29E-01	9.37E-02	1.27E-01
27	Frodo	1776	F	0.9342	2.3805	6.2326	8.5769	299.8319	0.7157	0.9689	1.9292	3.0528	286.5958	-1.94203482	9.42E-01	8.50E-02	-1.19E-01
27	Frodo	1777	F	0.7373	2.4762	5.1995	11.2979	332.6147	NA	NA	NA	NA	NA	-2.25423971	6.81E-01	1.48E-01	6.87E-02
27	Frodo	1779	F	0.651	3.2516	9.2365	10.9606	383.8838	0.6841	1.2191	2.663	3.7361	471.3041	-2.39671558	9.20E-01	-3.20E-01	5.04E-02
27	Frodo	1787	F	1.471	4.4973	6.7066	13.0689	411.8948	0.9133	2.0649	4.0166	5.433	405.067	-2.7611283	6.59E-01	-5.99E-02	1.61E-01
27	Frodo	1794	F	1.3243	4.3399	6.298	10.8234	387.1766	0.7915	1.6511	2.2717	4.5919	403.3489	-2.54012153	5.56E-01	1.22E-01	-3.40E-01
27	Frodo	1795	F	1.1141	2.9261	6.1962	13.9909	334.278	1.1453	1.2578	2.8965	5.3234	380.198	-1.80992562	1.03E+00	-1.80E-01	-2.04E-01
27	Frodo	1851	F	1.2102	3.3998	6.7265	8.4244	306.4778	0.4934	0.9294	2.362	3.4877	338.5317	-2.90624059	8.49E-01	-3.00E-01	-2.17E-01
27	Frodo	1853	F	0.931	2.4548	5.9113	10.1682	316.1009	NA	NA	NA	NA	NA	-3.26955757	3.74E-01	-2.00E-02	1.91E-01
27	Frodo	1854	F	0.7939	3.94	5.6494	11.8587	320.7355	0.6437	1.3818	2.1847	3.9827	326.7461	-2.85429426	6.41E-01	2.78E-01	1.19E-01
27	Frodo	1857	F	1.009	3.6346	6.3251	8.6182	386.7448	0.6872	1.5739	2.3399	4.0689	373.9132	-2.85634338	3.36E-01	1.68E-01	-1.93E-01
27	Frodo	1858	F	0.4634	1.798	3.8012	10.667	339.0868	0.5074	1.2358	1.7191	3.5878	340.4571	-2.52920845	9.10E-01	2.08E-01	-2.93E-01
27	Frodo	1859	F	0.8338	3.2863	3.9708	10.1389	318.5284	0.6276	1.1227	1.8321	3.0656	334.1027	-2.44105042	9.04E-01	-4.70E-01	2.02E-01
19	Bigeye	732	M	0.5349	0.5933	6.8271	3.2824	305.0754	0.3222	0.5032	2.125	1.2459	390.5325	-1.35018952	7.22E-01	7.77E-01	-2.19E-01
19	Bigeye	800	M	0.3	0.6602	6.0337	4.9148	274.42	0.1568	0.5196	2.1605	1.6947	279.1907	-3.02461162	4.24E-01	1.93E-02	-2.29E-02
19	Bigeye	109	M	0.6531	0.8021	6.1999	4.172	276.4271	0.2848	0.3964	2.1028	1.4037	286.4236	-2.9818193	5.96E-01	-3.77E-02	-2.41E-01
19	Bigeye	679	M	0.234	1.2378	5.5964	3.8537	295.5485	0.4291	0.5789	2.4333	1.6868	304.3111	-1.12005416	4.43E-01	1.47E-01	-3.40E-02
19	Bigeye	611	M	0.8805	1.1202	5.0483	4.9498	282.7754	0.3107	0.4802	1.6045	1.2744	272.3883	-1.59769596	7.60E-01	-4.78E-01	-1.89E-01
19	Bigeye	576	M	1.3895	2.3308	5.7845	4.3287	302.6133	NA	NA	NA	NA	NA	-1.071955	7.98E-01	-3.20E-01	-2.39E-01
19	Bigeye	618	F	0.5973	0.6573	7.1156	8.7631	338.2243	0.127	0.3472	1.6704	1.1859	365.2167	-1.08328602	8.83E-01	-2.84E-01	-5.13E-01
19	Bigeye	641	F	NA	NA	6.9296	8.965	363.8889	NA	NA	1.233	0.8503	378	0.22255446	1.13E+00	-7.05E-01	2.42E-01
19	Bigeye	642	F	NA	NA	NA	NA	NA	NA	NA	NA	NA	NA	-0.77432679	6.74E-01	3.92E-01	-3.33E-01
19	Bigeye	733	F	0.6966	1.1701	12.093	9.2634	386.1415	NA	NA	NA	NA	NA	-1.5727082	7.85E-01	5.64E-01	-1.06E+00
19	Bigeye	734	F	0.4346	0.8286	9.3763	8.4064	324.077	NA	0.5105	2.4042	1.4266	434.6042	0.91043634	1.75E+00	-1.15E+00	3.12E-01
19	Bigeye	897	F	0.886	1.3578	11.5016	17.315	346.5544	0.1131	0.2013	1.8164	2.3759	336.4502	-1.329745	4.62E-01	-5.05E-01	-2.56E-01
19	Bigeye	901	F	0.3535	0.4908	12.6034	7.7557	359.3451	0.1131	0.2567	1.6377	0.8739	364.9816	-0.69477364	7.94E-01	-6.86E-01	-8.38E-01
19	Bigeye	936	F	0.3706	1.3069	10.7378	10.4507	319.7848	0.2083	0.6063	2.2432	1.7009	357.0675	-0.61070965	5.47E-01	-1.26E-01	-6.31E-01
19	Bigeye	967	F	0.1412	0.3394	4.5473	4.4498	351.9296	0.1436	0.2614	0.6617	0.5072	382.3617	-1.90339255	6.98E-01	4.34E-01	-3.87E-01
19	Bigeye	2482	F	0.7873	0.7256	9.8335	7.6917	339.9613	0.0952	0.4104	1.7259	1.3888	370.466	0.66557106	1.51E+00	-1.04E+00	-5.04E-01
19	Bigeye	608	F	0.2653	0.5524	8.9815	9.4839	385.2689	0.1451	0.3566	1.5082	0.7639	467.3169	0.1656966	1.65E+00	-9.04E-03	-3.08E-01
23	Bigeye	111	M	2.5241	2.6449	11.5184	6.5735	280.7924	1.0581	0.9855	4.563	3.0828	324.959	-1.69512563	7.11E-01	7.06E-02	-3.33E-01
23	Bigeye	430	M	1.2375	1.8426	11.4526	5.5702	329.3935	NA	NA	NA	NA	NA	-0.97332493	8.90E-01	-1.74E-02	-1.11E+00
23	Bigeye	431	M	1.336	1.4846	6.2727	7.172	326.1743	0.2971	1.1128	2.4927	2.0292	308.452	-0.75786007	1.54E+00	4.00E-01	-8.17E-01
23	Bigeye	432	M	0.6312	0.8222	7.5653	6.6761	292.5412	0.3701	0.6596	2.9976	2.2022	326.223	-2.20646912	8.41E-01	4.53E-01	1.09E-01
23	Bigeye	433	M	1.0376	1.2046	7.1279	6.3318	309.7641	NA	NA	NA	NA	NA	-0.23143929	1.05E+00	2.81E-01	-1.06E+00
23	Bigeye	558	M	1.3422	1.9979	9.6737	6.0851	282.1022	0.8514	0.8545	3.6864	2.2235	307.7476	-2.1861482	4.75E-01	-1.36E-01	9.74E-02
23	Bigeye	597	M	1.5205	1.6759	10.4098	6.3447	314.4	0.5208	0.5003	4.2648	1.7414	339.905	1.3939159	1.18E+00	-6.50E-01	-4.54E-01
23	Bigeye	61	M	1.781	2.4593	8.5527	6.9927	343.9139	0.9131	0.8656	3.8919	2.0849	348.0498	4.72239862	3.75E+00	1.74E+00	3.68E+00
23	Bigeye	598	F	NA	NA	NA	NA	NA	0.7248	0.9221	3.2061	3.1315	363.7048	1.97531056	1.36E+00	-1.24E+00	-9.36E-02
23	Bigeye	665	F	1.6347	1.9517	14.9187	10.6204	382.5887	0.4655	0.902	4.8905	2.6491	396.217	3.67411098	7.11E-01	-1.26E+00	5.23E-01
23	Bigeye	666	F	2.1026	3.515	10.7015	10.6581	334.5071	0.6934	1.0192	5.0149	3.145	375.1053	0.60741822	9.49E-01	-1.71E-01	-9.58E-01
23	Bigeye	759	F	0.3452	0.5578	7.4422	8.0524	306.9272	NA	NA	NA	NA	NA	3.61925048	1.03E+00	-2.96E-02	-4.62E-02
23	Bigeye	813	F	0.3222	1.3172	15.1974	9.8929	407.5858	NA	NA	NA	NA	NA	2.45316075	1.50E+00	-7.03E-01	1.32E-01
23	Bigeye	814	F	0.486	0.6131	5.8121	5.6724	290.8014	0.3854	0.5647	3.4366	2.5239	417.7512	3.04051648	3.95E-01	-3.15E-01	5.43E-01
23	Bigeye	964	F	0.4718	0.6012	10.701	8.0403	262.2593	0.0961	0.3835	1.3863	1.279	286.5871	0.9545753	1.19E+00	4.08E-01	4.91E-01
23	Bigeye	965	F	1.8557	2.8241	10.0748	10.1659	297.2284	0.6373	0.9259	2.483	2.6728	305.4097	2.8421723	2.50E+00	4.25E-01	-4.78E-01
27	Bigeye	865	M	1.6916	1.9413	7.8044	7.0066	257.5068	0.7366	0.8949	3.0523	3.3746	255.6514	0.61932448	1.70E+00	-4.68E-01	-2.99E-01
27	Bigeye	863	M	1.3595	2.3995	7.0316	7.9314	257.5472	NA	NA	NA	NA	NA	1.81798023	1.56E+00	-1.46E-01	4.88E-02
27	Bigeye	154	M	2.0548	2.2747	8.3927	5.7941	251.3333	1.3441	0.8804	3.0332	2.2878	245.4167	3.54116781	1.13E+00	1.68E+00	-3.16E-01
27	Bigeye	157	M	2.3498	2.6379	10.2681	16.3118	299.0153	1.3272	2.0594	8.8412	4.952	297.8601	4.3793927	1.75E+00	2.05E+00	-7.09E-01
27	Bigeye	161	M	2.0203	3.3393	9.155	8.7597	285.3386	1.1234	1.3742	4.6185	2.5641	333.1142	0.78436407	1.75E+00	-6.91E-01	2.71E-01
27	Bigeye	278	M	1.6972	2.951	10.11	8.5942	241.9297	NA	NA	2.41	2.4107	258.6559	0.67037645	9.72E-01	-2.68E-01	-3.74E-01
27	Bigeye	321	M	2.1893	2.7044	10.2965	7.7249	272.2887	1.1904	1.2736	4.9907	4.3062	276.2996	3.33096387	2.29E+00	-2.74E-01	1.49E+00
27	Bigeye	405	M	2.5406	1.7589	9.6265	6.862	285.156	1.3563	1.0487	4.4212	2.4837	278.1796	-1.43815867	-1.22E+00	3.34E-01	6.63E-02
27	Bigeye	8	M	2.9163	2.1762	9.4251	5.4625	301.2901	1.2948	1.4534	4.5031	3.4126	267.8639	-0.35826311	-4.40E-01	1.00E+00	-9.99E-01
27	Bigeye	83	M	2.5107	3.0946	11.7954	8.2265	322.6155	1.1331	0.9192	4.0935	2.7861	323.0558	-0.44219591	-1.01E+00	5.73E-01	-2.17E-01
27	Bigeye	84	M	1.5995	2.4102	9.9028	6.0849	274.9524	1.1312	1.3356	2.091	2.9537	235.034	-0.35562047	-1.99E-01	1.36E-01	-3.83E-01
27	Bigeye	86	M	1.6682	2.9096	8.8691	5.8363	302.8978	NA	NA	NA	NA	NA	-0.23922325	-3.64E-01	5.54E-01	6.30E-02
27	Bigeye	278	M	1.6885	2.8918	10.4643	7.619	254.3255	1.2094	1.0767	3.4503	2.1441	260.8065	1.45130466	1.91E-01	-4.44E-01	8.50E-01
27	Bigeye	85	M	2.1764	2.8505	12.4108	8.9977	327.3134	0.825	1.284	4.3729	3.6081	325.4283	5.3984251	-1.59E+00	1.33E-01	9.20E-01
27	Bigeye	859	M	2.3158	3.423	9.0431	7.4467	263.1285	0.6779	1.1049	4.0281	2.8385	284.8818	1.62445035	-1.62E+00	6.21E-01	3.67E-01
27	Bigeye	10	F	1.4365	2.2663	10.7368	10.5065	335.0761	0.2993	1.6893	2.544	5.7845	347.9749	1.42813495	4.18E-01	5.48E-01	-6.13E-01
27	Bigeye	11	F	1.3209	2.637	13.2125	9.4335	288.2264	0.8274	0.8844	4.9427	2.8553	351.7186	0.79182191	-7.36E-01	1.23E+00	-1.13E+00
27	Bigeye	279	F	2.8921	2.9769	16.0263	12.4932	328.8707	1.4254	0.9645	7.1496	5.4059	337.8217	1.04462907	-6.51E-01	5.34E-01	-5.62E-01
27	Bigeye	28	F	1.7446	1.7922	14.2645	11.3776	332.4959	0.1311	0.6695	4.0362	5.3564	296.9539	3.23727687	-1.09E+00	3.88E-01	1.16E-01
27	Bigeye	29	F	1.3793	2.0189	11.7052	10.8086	364.4502	0.0944	1.046	3.8826	3.0927	388.519	1.72916357	-2.11E+00	1.10E+00	1.74E-01
27	Bigeye	400	F	NA	NA	NA	NA	NA	NA	NA	NA	NA	NA	2.42510744	-7.83E-01	1.07E-01	3.96E-01
27	Bigeye	496	F	2.1461	4.2037	15.4236	14.5315	345.4063	1.4139	1.4708	5.5105	4.4407	334.99	4.89790924	2.51E-01	1.69E-01	-7.05E-01
27	Bigeye	498	F	1.479	3.2076	14.0022	12.0938	349.6633	0.7544	0.8844	5.486	2.8987	359.4684	4.55497507	5.52E-01	8.79E-01	-3.84E-01
27	Bigeye	499	F	1.4034	2.2881	14.594	16.7888	360.114	0.6258	0.9448	5.3084	4.3774	351.1579	5.6593561	-8.58E-01	-1.33E+00	6.88E-01
27	Bigeye	501	F	1.5802	2.5887	10.7755	10.8873	250.6713	NA	NA	NA	NA	NA	10.95617512	4.77E-01	1.23E+00	-4.26E+00
27	Bigeye	502	F	1.0232	2.1218	6.2227	10.305	244.1958	0.2801	0.5754	2.4284	1.8843	248.9266	5.51925395	-1.02E-01	7.44E-01	6.71E-01
27	Bigeye	503	F	NA	NA	NA	NA	NA	0.6554	1.0065	4.4482	3.767	264.5985	5.59724691	1.53E-02	2.08E+00	1.06E+00
27	Bigeye	514	F	2.1596	3.3266	11.1137	13.5747	261.6289	NA	NA	NA	NA	NA	7.63860918	1.66E-02	-5.29E-01	-9.24E-01
27	Bigeye	567	F	1.7778	2.9167	11.8187	15.9205	306.7762	0.635	0.8927	5.7886	3.8742	320.0617	5.66894878	-1.66E+00	-1.27E+00	-2.84E-01
27	Bigeye	588	F	1.0973	1.047	11.9883	14.0831	309.683	0.5143	0.6128	4.6908	3.2256	313.8366	6.69736908	-4.00E-01	-2.51E+00	-5.46E-01
27	Bigeye	729	F	2.3521	4.2151	15.7027	17.1064	364.815	1.3706	1.2325	6.4315	5.7742	400.3961	4.87473391	-1.18E+00	3.39E-01	8.67E-01
27	Bigeye	753	F	1.2471	1.6315	16.2605	14.0199	303.1073	0.2793	0.7463	4.0743	3.6522	315.8729	5.93019435	1.10E+00	-1.36E+00	-1.98E-01
27	Bigeye	10	F	1.6643	2.0414	12.6403	10.7052	375.1746	0.4194	1.5148	3.0878	6.0062	350.2861	3.30323465	-1.82E-01	6.05E-02	9.15E-01
27	Bigeye	860	F	1.2624	2.3205	10.4959	8.9885	254.1213	0.5844	0.7709	3.7265	2.528	284.6891	6.14078971	-6.06E-01	4.14E-01	7.26E-01
27	Bigeye	861	F	2.7597	3.6235	11.2333	14.387	317.6867	NA	NA	NA	NA	NA	5.22324682	-3.09E-01	7.71E-01	-2.54E-01
27	Bigeye	864	F	2.0511	2.0211	16.7385	14.3505	351.5069	NA	NA	NA	NA	NA	5.88688119	-2.19E-02	9.26E-01	1.15E+00
27	Bigeye	866	F	2.7837	2.1012	15.0234	14.1957	359.8188	1.2775	1.1157	6.9325	4.2143	359.4006	-1.387484441	7.02E-01	-2.95E-01	3.52E-01
27	Bigeye	867	F	1.3572	2.3537	14.1807	12.8937	375.4655	0.7677	0.8419	6.4694	3.7937	387.8061	-3.121705444	-1.61E-01	1.33E-01	-1.59E-01
27	Bigeye	9	F	1.4992	2.4844	11.8414	10.4014	283.3244	0.3719	1.7044	3.564	4.5197	282.4607	-1.800956148	4.38E-01	-4.11E-01	7.98E-02
19	Chocolate	651	F	NA	NA	NA	NA	323.0216	0.1055	0.1619	0.9324	0.884	342.9605	-2.016206158	3.90E-01	1.84E-01	-2.83E-01
19	Chocolate	653	F	0.0777	0.3374	4.0296	4.0167	338.2336	NA	NA	NA	NA	NA	-1.860831034	6.96E-01	4.72E-01	-2.63E-01
19	Chocolate	706	F	0.1539	0.2674	4.9895	3.6231	367.4699	0.0675	0.1936	0.6499	0.6118	376.3825	-2.998757131	2.44E-01	-4.83E-02	5.24E-01
19	Chocolate	707	F	0.2061	0.6018	2.9417	7.0024	355.5045	0.0755	0.2061	1.0566	0.8481	355.3419	-0.915940402	8.53E-01	1.81E-01	-8.02E-01
19	Chocolate	743	F	0.5337	0.6734	4.7283	5.9338	325.9027	0.1069	0.3004	0.8903	0.8403	371.9055	-0.312719505	8.23E-01	-3.80E-01	1.51E-01
19	Chocolate	744	F	0.3847	0.5228	6.0134	5.1988	315.4115	NA	NA	NA	NA	NA	-1.702642102	8.28E-01	1.34E-01	7.89E-02
19	Chocolate	796	F	0.1039	0.6665	5.9869	6.0909	355.2866	0.0627	0.2277	0.8102	0.5459	380.9244	-1.054929392	-6.19E-02	-4.56E-01	5.69E-03
19	Chocolate	797	F	0.3238	0.4268	4.5231	4.9132	314.611	0.0468	0.2622	0.7678	0.4908	344.3994	-1.309464204	8.92E-01	1.68E-01	-4.05E-02
19	Chocolate	920	F	0.2968	0.4563	6.1377	5.1363	341.1823	NA	NA	NA	NA	NA	-2.221497917	4.61E-01	5.56E-02	-2.15E-01
19	Chocolate	422	F	0.1585	0.3751	4.5518	3.3986	310.2546	0.0123	0.1932	0.7879	0.7291	309.1135	-2.359337439	8.07E-01	2.91E-01	3.51E-01
19	Chocolate	54	F	0.6666	0.8011	4.773	4.5666	301.674	0.0919	0.2431	1.466	1.2196	278.008	-2.184664142	2.56E-01	-3.80E-01	-2.03E-01
19	Chocolate	57	F	0.2111	0.311	4.2769	4.0706	331.4557	0.0754	0.219	1.0061	0.469	366.7844	-1.77224653	8.57E-02	1.39E-02	-1.11E-01
19	Chocolate	630	F	0.2282	0.4475	6.0615	5.2816	430.3117	0.0936	0.1609	1.179	0.8021	450.2032	-1.626979167	8.36E-01	-2.59E-02	-5.51E-01
19	Chocolate	631	F	0.3191	0.6094	5.3174	4.9125	365.7189	0.0804	0.2723	1.3085	0.9839	385.7604	-2.19886872	4.57E-01	-8.21E-01	2.54E-01
19	Chocolate	637	F	0.1655	0.3503	6.0232	6.6382	319.0575	0.0566	0.2373	1.021	0.6949	346.6958	-2.108680263	3.32E-01	-2.27E-01	4.02E-01
19	Chocolate	638	F	0.1436	0.5618	4.3277	4.2682	330.363	NA	NA	NA	NA	NA	-2.287195967	4.47E-01	-1.34E-01	1.91E-02
19	Chocolate	137	F	0.4089	0.7584	5.8878	5.0272	336.6468	0.0936	0.2809	1.3795	1.1236	387.1017	-0.000908775	-6.82E-05	2.09E-07	1.46E-08
19	Chocolate	22	F	0.2586	0.3842	6.2134	4.8555	380.391	0.0386	0.2135	1.2824	0.9294	389.8195	-3.102475704	-7.94E-02	1.69E-01	3.76E-01
19	Chocolate	230	F	NA	NA	NA	NA	310.4384	NA	NA	NA	NA	NA	-3.108974423	9.31E-02	8.01E-02	4.28E-01
19	Chocolate	135	F	0.0315	0.5609	5.6514	4.4713	311.5515	0.0123	0.1949	1.0689	0.7858	353.7956	-2.495686645	3.51E-01	1.45E-01	4.89E-01
19	Chocolate	136	F	0.2679	0.3591	4.7658	4.4034	350.8797	0.0266	0.2155	0.8676	0.8692	415.483	-2.735306146	1.85E-01	-3.00E-01	-2.36E-02
19	Chocolate	2483	M	0.7366	0.9469	3.6932	4.5756	268.299	NA	NA	2.0664	1.3873	307.0211	-2.318844161	5.05E-01	1.99E-01	1.40E-01
19	Chocolate	134	M	0.4362	0.5623	3.0673	1.5397	254.4801	0.1796	0.3072	1.2204	0.988	261.0418	-2.20199947	3.05E-01	5.53E-02	1.61E-01
19	Chocolate	138	M	0.0882	0.2224	1.6549	1.353	320.4113	0.0187	0.0929	0.568	0.6234	345.8459	-1.239932612	5.05E-01	-2.05E-01	-1.98E-01
19	Chocolate	21	M	0.023	0.3063	1.6322	1.4267	312.4951	0.0103	0.1397	0.5586	0.4856	322.1789	-2.009646536	-7.66E-02	-6.42E-01	1.84E-01
19	Chocolate	234	M	0.2379	0.6331	4.0385	3.7738	297.4287	0.0292	0.2072	1.1694	0.884	291.6276	-1.561770308	1.20E-01	-2.98E-01	2.41E-02
19	Chocolate	476	M	0.2486	0.5835	2.6238	2.0112	310.6679	0.0525	0.2712	0.8579	0.6586	312.6219	-0.000908775	-6.82E-05	2.09E-07	1.46E-08
19	Chocolate	556	M	0.376	0.8425	3.7845	3.097	261.324	0.1558	0.2831	0.897	0.7244	312.4838	-1.596940783	7.62E-01	4.31E-01	-2.21E-01
19	Chocolate	602	M	0.2396	0.488	2.3694	1.8592	238.924	0.1246	0.2015	0.4142	0.4832	264.119	-2.241945609	1.25E-01	-2.99E-01	-1.43E-01
19	Chocolate	605	M	0.046	0.3011	1.5691	1.56	274.7155	0.0159	0.1102	0.5019	0.4317	345.4067	-1.148979668	2.04E-01	-4.09E-01	-1.35E-01
19	Chocolate	652	M	0.0687	0.6181	1.8416	4.1013	270.5584	0.0111	0.2506	0.8129	0.7978	295.2497	-1.965116892	2.88E-01	-1.86E-01	-3.98E-01
19	Chocolate	676	M	0.3593	0.3585	2.6461	1.6423	277.7518	NA	NA	NA	NA	NA	-1.564836213	4.32E-01	-3.89E-01	-2.39E-01
19	Chocolate	704	M	0.0214	0.963	2.5008	2.6535	307.7561	NA	NA	NA	NA	NA	1.064677417	4.41E-01	-1.18E+00	-7.15E-02
19	Chocolate	705	M	0.1396	0.2545	1.298	2.5763	295.0912	0.0591	0.2791	0.7135	0.711	316.8004	-1.052375391	3.55E-02	-8.65E-01	4.66E-01
19	Chocolate	795	M	0.0452	0.6959	1.9433	2.6368	288.0063	0.0817	0.2547	0.3817	0.7062	307.5675	-0.375576884	3.57E-01	4.74E-01	-8.39E-01
19	Chocolate	882	M	0.2512	0.419	3.1717	2.4336	329.147	0.117	0.4549	1.1516	0.8247	343.7533	-0.718734709	6.15E-01	2.78E-01	-4.93E-01
19	Chocolate	90	M	0.7126	1.0863	4.0402	3.5657	293.3239	0.114	0.4479	1.3632	0.9023	323.3939	0.158414888	9.46E-01	-7.23E-01	3.85E-01
19	Chocolate	917	M	NA	NA	NA	NA	376.4975	0.0918	0.1419	0.6299	0.702	332.7642	0.119841853	6.87E-01	-5.85E-02	-4.15E-01
19	Chocolate	969	M	0.0506	0.2136	2.2808	1.4166	276.8823	NA	0.1532	0.7283	0.9193	292.3832	-1.183292877	4.26E-01	-8.65E-01	1.07E+00
23	Chocolate	115	F	0.7237	1.0998	6.1416	6.609	354.1297	0.488	0.7538	2.6947	1.7965	365.9274	-0.354915439	2.88E-01	-3.75E-01	4.83E-01
23	Chocolate	186	F	0.6554	0.8598	6.615	6.8841	306.5916	0.2138	0.401	2.3969	1.8383	327.567	-0.74484999	3.07E-01	-3.16E-01	3.41E-01
23	Chocolate	189	F	0.6297	1.1709	6.3999	7.8273	379.0928	0.1846	0.4127	1.4818	1.4116	360.409	-1.043822384	6.29E-01	-2.35E-01	4.17E-01
23	Chocolate	1893	F	1.2647	1.6924	8.4291	8.4953	372.264	NA	NA	NA	NA	NA	-0.134950621	7.22E-02	-3.13E-01	-1.57E-01
23	Chocolate	190	F	NA	NA	NA	NA	329.4519	0.0492	0.3046	1.54	1.0796	370.1215	1.249730223	1.16E+00	-4.79E-01	-3.77E-01
23	Chocolate	191	F	0.5795	0.9075	6.9042	8.1891	358.1124	0.11	0.3036	1.7297	1.6948	337.3219	-0.719842814	2.02E-01	-3.75E-01	-5.62E-01
23	Chocolate	192	F	1.0916	1.8203	6.9918	7.7986	385.5779	0.255	0.4206	2.038	0.8676	361.0421	-0.668487074	-3.54E-01	-2.71E-01	3.58E-01
23	Chocolate	193	F	0.6031	1.2929	6.029	6.8366	338.4726	0.2903	0.3753	1.8593	1.566	351.3795	-0.013022214	6.91E-01	-4.70E-01	-2.15E-01
23	Chocolate	194	F	0.3998	0.5571	4.5227	5.0775	267.9814	0.0691	0.3192	1.3106	1.2554	264.4662	-0.213571062	5.07E-01	-7.30E-01	9.83E-01
23	Chocolate	204	F	0.9572	1.4721	6.3557	6.3033	284.0393	0.298	0.3898	2.2469	1.7078	339.9406	-0.398024546	3.29E-01	-3.39E-01	-9.52E-01
23	Chocolate	205	F	0.4015	0.6943	7.0256	6.4075	355.6437	0.1087	0.3682	1.4584	0.8879	361.2783	0.157932274	4.12E-01	-1.11E+00	-4.86E-01
23	Chocolate	206	F	0.8106	0.8257	9.2478	7.9353	336.9838	0.1766	0.3623	3.311	1.9623	298.8769	-0.313497982	2.73E-01	-8.64E-01	5.55E-01
23	Chocolate	251	F	0.2015	0.5389	5.93	4.6884	300.711	0.1223	0.2702	1.8763	1.268	362.0283	-0.954593059	5.40E-01	-4.04E-01	-4.25E-01
23	Chocolate	252	F	0.765	1.2193	6.9183	6.4732	321.8484	NA	NA	NA	NA	NA	0.810655646	7.64E-01	-1.20E+00	-1.18E+00
23	Chocolate	284	F	0.7709	1.1552	6.9191	9.0164	353.1869	0.2233	0.5721	2.192	1.4069	344.4878	0.743629297	8.26E-01	-4.04E-01	-3.03E-01
23	Chocolate	285	F	1.3077	1.7378	7.3351	7.7762	389.0014	0.2753	0.5697	1.9671	1.4457	378.6392	0.459530305	4.22E-01	-6.17E-01	-5.16E-01
23	Chocolate	342	F	0.8247	0.8552	8.7123	9.2764	368.4576	0.2453	0.5142	3.1725	2.7504	420.9419	0.792561418	1.11E+00	-5.50E-01	9.11E-01
23	Chocolate	388	F	0.7014	1.0609	6.6169	7.0883	320.6221	0.342	0.3579	2.4265	2.0655	330.8772	-0.736648757	1.31E-01	-5.06E-01	1.29E-01
23	Chocolate	389	F	1.0282	1.1759	8.2055	8.2419	384.4234	0.3817	0.5424	3.6197	2.8474	380.8497	-0.408249889	8.53E-01	-2.09E-01	9.54E-02
23	Chocolate	823	F	0.271	0.4302	6.2364	6.7987	325.8438	0.1233	0.2166	1.1495	0.76	376.3404	-1.419931018	9.66E-01	-2.68E-01	3.94E-01
23	Chocolate	187	M	1.2257	1.6853	4.5996	4.3235	264.9494	0.5035	0.703	2.1035	1.5042	317.3394	-0.927889761	1.12E+00	-2.74E-01	2.54E-01
23	Chocolate	188	M	1.1498	1.287	4.5039	3.4787	266.1972	0.534	0.7435	1.5489	1.3283	301.4799	-0.697017543	3.28E-01	-6.54E-01	-2.53E-02
23	Chocolate	1890	M	1.3287	1.9434	6.5262	5.1943	301.6665	0.4569	0.6233	3.3621	2.2377	335.185	1.24484112	3.44E-01	-1.62E+00	5.42E-01
23	Chocolate	1891	M	1.199	1.6893	5.0141	5.3537	333.2553	0.361	0.5753	2.1131	1.8131	352.438	1.041852465	3.71E-01	-5.50E-01	3.98E-02
23	Chocolate	196	M	0.654	0.9792	2.7154	5.237	276.4939	0.1687	0.519	1.2915	1.2024	228.8304	0.142888557	2.78E-01	-5.07E-01	3.54E-01
23	Chocolate	207	M	0.4468	0.7479	2.9722	1.994	251.6884	0.2664	0.5328	1.2295	1.4151	249.8543	1.850795311	1.63E-01	-1.40E+00	2.92E-01
23	Chocolate	208	M	0.2282	0.7291	4.642	5.7339	329.9603	0.1782	0.546	2.5295	1.3005	360.9724	1.162207794	9.97E-01	-9.71E-01	6.24E-02
23	Chocolate	209	M	0.507	0.803	4.2611	2.3487	273.2593	0.2587	0.492	1.7251	1.2466	272.803	0.725534636	2.32E-01	-2.27E-01	-4.08E-01
23	Chocolate	2453	M	0.5267	0.9964	3.9918	4.0152	289.2045	0.4477	0.7295	2.056	1.6557	284.9068	2.667438857	4.21E-01	-5.05E-01	-6.74E-01
23	Chocolate	2454	M	NA	NA	5.0998	4.6937	280.6047	0.208	0.5057	1.6906	1.6642	286.3649	0.650964898	2.91E-01	-6.45E-01	3.61E-01
23	Chocolate	2455	M	1.1748	1.6068	5.5555	5.4235	313.2573	0.4343	0.5241	1.616	1.9153	311.6413	-0.267971223	4.56E-01	-3.68E-01	-2.55E-01
23	Chocolate	343	M	0.7306	0.8913	4.6877	3.5027	279.3005	0.4068	0.5162	2.182	1.6151	297.3826	0.408358551	1.98E-01	-5.79E-01	8.19E-01
23	Chocolate	36	M	0.4926	0.702	4.7709	3.6716	304.9335	0.1716	0.454	2.2397	1.3382	369.8837	0.947819067	1.79E-01	-7.64E-01	1.78E-01
23	Chocolate	390	M	0.2494	0.7538	3.6617	3.5415	244.4522	0.1847	0.3277	1.5084	0.7352	284.8818	1.806550221	5.22E-01	-1.42E+00	-1.21E-01
23	Chocolate	391	M	0.7706	0.8634	3.6273	2.9941	269.0934	0.2838	0.4249	2.3699	1.5253	267.5628	-1.423104566	2.98E-01	-3.12E-01	1.83E-01
23	Chocolate	532	M	0.9814	1.2203	5.0087	4.5285	292.7557	0.0839	0.5343	2.7239	1.4673	302.2203	-0.71773804	8.11E-01	3.65E-02	3.87E-01
23	Chocolate	59	M	0.7272	1.0728	4.5083	3.2427	283.4322	0.3714	0.5228	1.5106	1.1119	303.2419	-0.594605281	7.86E-01	-5.38E-01	2.31E-01
23	Chocolate	695	M	0.2309	0.5221	2.8352	2.9264	211.201	0.1698	0.3468	1.3474	0.7451	211.558	0.321480568	1.51E-01	-6.56E-01	4.52E-01
23	Chocolate	708	M	1.052	1.2446	5.6668	4.0469	297.4287	0.422	0.4988	1.728	1.3421	297.6151	0.535979773	5.98E-01	-8.16E-01	3.47E-01
23	Chocolate	785	M	0.7441	0.8426	6.4146	5.6051	311.3507	0.3745	0.5924	2.5407	1.3922	287.2934	-0.23350907	-9.00E-02	-1.08E+00	2.79E-01
27	Chocolate	1272	F	1.6682	2.0987	6.6735	9.2763	268.9206	0.488	0.5279	2.0127	2.0043	265.7438	0.422628612	1.10E+00	-8.74E-01	2.10E-01
27	Chocolate	13	F	0.2779	0.459	6.6562	7.8734	311.0056	0.1011	0.255	1.4203	0.9511	312.3596	-0.702385221	6.72E-02	-2.25E-01	-2.14E-02
27	Chocolate	1332	F	0.8348	1.3656	6.3924	6.4344	307.8318	0.3158	0.4499	1.8988	1.7671	354.1297	0.475442019	3.76E-01	-1.13E+00	4.14E-01
27	Chocolate	1333	F	0.6788	0.9854	7.6931	7.342	302.736	0.2002	0.4568	2.418	1.8869	315.462	-0.317855486	-2.34E-01	-4.70E-01	1.99E-01
27	Chocolate	1334	F	0.5943	0.6999	8.565	8.1754	313.7235	0.3087	0.6419	2.5908	1.4648	305.1395	0.183610818	7.93E-01	-4.85E-01	4.81E-01
27	Chocolate	1335	F	0.9113	1.3054	9.2413	9.2011	273.781	0.3366	0.5755	3.142	1.9803	306.9137	-0.918580292	4.01E-01	-7.20E-01	4.55E-02
27	Chocolate	1336	F	1.2648	1.9054	5.8043	6.5284	260.9602	NA	NA	NA	NA	NA	-0.696746018	8.10E-01	-3.31E-01	1.12E-01
27	Chocolate	1340	F	NA	NA	NA	NA	337.0317	0.5846	0.6601	3.5763	2.2602	379.689	-1.325111656	9.07E-01	-9.79E-02	3.70E-01
27	Chocolate	1341	F	1.2283	1.0133	4.7633	5.9472	266.0694	NA	NA	NA	NA	NA	-1.221893106	5.77E-01	-1.17E-01	5.14E-01
27	Chocolate	1342	F	0.845	1.0159	8.2223	8.5648	353.9637	0.5867	0.5329	3.4885	2.3688	346.8993	0.937913023	6.47E-01	-5.76E-01	-9.37E-02
27	Chocolate	1343	F	1.3405	2.2393	5.351	8.88	283.06	0.5337	0.7771	2.1722	2.5296	328.3956	-0.491997863	1.65E-01	3.04E-01	-1.94E-01
27	Chocolate	1367	F	0.9338	1.5036	7.6947	7.9368	352.6884	0.6634	0.7514	3.2695	2.8474	366.3005	-1.387178761	6.57E-01	-7.64E-01	4.93E-01
27	Chocolate	1368	F	0.7352	1.0097	7.6277	6.8263	335.5025	0.4318	0.5884	3.1767	2.0064	338.0157	-0.360261814	4.71E-01	2.54E-01	-5.13E-01
27	Chocolate	14	F	0.6324	0.6665	6.2932	6.075	303.4255	0.2	0.369	2.052	1.5814	317.3656	2.006282359	4.28E-01	-5.98E-01	-9.74E-02
27	Chocolate	2450	F	0.6143	1.0577	3.7743	10.3287	251.4609	0.1337	0.3915	2.3579	2.3959	244.7947	-0.454913061	5.04E-01	-1.43E-01	-2.22E-02
27	Chocolate	24	F	NA	NA	NA	NA	275.0883	NA	NA	NA	NA	NA	0.148949739	1.74E-01	-6.73E-01	-1.12E-01
27	Chocolate	249	F	0.726	1.0855	7.2827	7.1081	268.4467	0.3983	0.6213	2.6161	1.8179	266.6042	0.551947024	1.27E+00	3.61E-03	3.04E-02
27	Chocolate	250	F	1.0822	2.269	4.8867	10.7792	231.7695	NA	NA	NA	NA	NA	1.652955199	7.40E-01	-4.06E-01	-2.09E-02
27	Chocolate	274	F	0.887	1.0653	7.4461	6.7851	267.9688	0.2131	0.5335	3.0911	2.6835	275.9402	0.173241474	8.08E-01	4.54E-02	1.63E-02
27	Chocolate	275	F	0.8185	0.9236	7.165	6.573	337.5637	0.2217	0.8407	2.9072	2.4015	359.997	1.582183963	7.12E-01	-9.56E-01	-1.46E-01
27	Chocolate	27	F	NA	NA	NA	NA	311.0529	NA	NA	NA	NA	NA	-3.029481347	-2.96E-02	-9.42E-02	-1.61E-01
27	Chocolate	276	F	1.1735	1.2784	6.3218	6.8658	335.0521	0.0985	0.5036	3.2243	2.5036	340.0568	-3.816020616	-2.62E-01	7.21E-03	2.71E-01
27	Chocolate	314	F	0.6046	1.1077	6.3472	7.7961	341.1823	0.4777	0.4666	2.1599	1.9782	352.2444	-3.866373797	-7.83E-02	-2.10E-01	3.64E-01
27	Chocolate	315	F	1.0789	1.0505	8.034	9.3753	347.6976	0.3798	0.5203	2.2329	1.7695	326.2061	-3.208560579	-5.84E-01	6.46E-02	-3.66E-01
27	Chocolate	262	F	1.1188	1.6878	6.5947	8.8649	351.0161	0.25	0.6332	2.605	2.0742	367.8556	-2.756116035	-1.33E-01	-1.55E-01	-3.65E-01
27	Chocolate	363	F	1.2672	1.4672	6.3003	9.0546	275.5453	0.3932	0.4658	2.294	2.1789	266.7471	-2.422891416	4.29E-01	1.37E-01	2.33E-01
27	Chocolate	413	F	1.1751	2.1012	6.6438	12.154	273.7204	0.5992	0.6476	3.0336	3.0633	292.1749	-3.259119317	1.82E-02	2.71E-01	-2.65E-01
27	Chocolate	488	F	0.2809	0.6292	6.1972	8.2404	319.2065	0.1333	0.3436	1.9329	1.633	354.6796	-3.289515799	-7.62E-02	-1.76E-02	-1.36E-01
27	Chocolate	78	F	0.3369	0.5993	5.9047	7.6312	276.904	0.1565	0.3346	1.0559	1.0597	308.8788	-2.838026288	3.78E-01	1.48E-01	2.62E-01
27	Chocolate	854	F	0.5626	0.4563	7.2914	8.2404	263.5691	NA	NA	NA	NA	NA	-3.595360111	-1.28E-02	3.55E-02	3.94E-01
27	Chocolate	853	F	1.0267	1.3083	5.7389	7.0012	257.9193	0.2693	0.5609	1.7135	1.8132	268.299	-2.098173176	1.93E-01	-3.10E-01	3.12E-01
27	Chocolate	855	F	0.6005	0.7336	4.3865	3.3203	235.605	0.368	0.4762	2.1888	1.389	234.1813	-3.608792293	-3.81E-02	-1.98E-01	2.18E-01
27	Chocolate	12	M	0.9474	1.3061	4.1	3.6493	266.7249	0.5896	0.6538	1.8393	1.4505	294.7987	-3.605170863	6.35E-02	-1.13E-01	2.01E-01
27	Chocolate	1273	M	1.5988	1.9414	4.8942	5.0863	265.9708	0.2645	0.4994	2.2932	2.013	273.5027	-3.109322943	-1.36E-03	-9.23E-02	2.59E-01
27	Chocolate	1275	M	1.3454	1.7247	5.4712	4.4744	285.739	0.7013	0.6126	3.2654	2.0984	304.2614	-2.902640419	2.91E-01	6.01E-01	-3.64E-01
27	Chocolate	1276	M	1.5453	2.0111	7.3541	5.893	304.618	0.8806	0.7548	2.8058	2.0833	363.1395	-3.360960675	-2.81E-01	8.78E-03	3.01E-01
27	Chocolate	1366	M	1.6577	1.9547	6.1233	5.3493	271.0227	0.6868	0.8111	3.3857	1.7731	278.7222	-2.752862412	2.10E-01	-2.77E-04	1.07E-01
27	Chocolate	1422	M	1.3659	1.1942	6.1785	4.1496	270.4995	0.6349	0.5831	2.5644	1.5053	266.7434	-3.343908719	2.83E-01	6.47E-02	2.94E-01
27	Chocolate	152	M	0.9744	1.5164	5.6306	4.6046	281.2013	0.4943	0.5213	2.3567	1.7274	246.8867	-0.000908775	-6.82E-05	2.09E-07	1.46E-08
27	Chocolate	1274	M	0.9903	0.8633	5.2529	4.3975	239.9524	0.4912	0.6791	2.6413	1.7216	282.03	-3.310003864	1.93E-01	4.33E-01	1.56E-01
27	Chocolate	245	M	1.3079	1.1683	7.5172	6.0008	296.2291	0.7291	0.5115	2.656	1.5542	308.8645	-3.585830606	-4.89E-02	-1.17E-01	1.42E-01
27	Chocolate	2451	M	0.6234	0.7194	3.4674	3.0141	254.4794	0.1779	0.3691	1.1618	0.8271	273.5167	-0.74144946	-9.64E-02	-3.71E-01	7.73E-01
27	Chocolate	246	M	1.0929	1.3857	4.7171	3.6929	239.5091	0.5766	0.6566	1.9095	1.0823	230.9368	-0.964651918	6.05E-01	2.61E-01	1.72E-01
27	Chocolate	247	M	0.7397	0.9558	4.4701	4.7619	245.3856	0.3722	0.3862	1.9405	1.2695	254.3811	-1.894938913	-7.90E-02	4.44E-02	-2.02E-01
27	Chocolate	313	M	1.4656	1.9933	5.2894	4.5745	263.5691	0.3936	0.6753	2.0591	1.4934	281.3013	-0.003316227	4.61E-01	-4.18E-01	8.86E-02
27	Chocolate	316	M	0.7249	1.2024	5.642	4.3647	249.7675	0.6304	0.5555	2.2261	1.4162	236.06	-2.667894947	2.88E-01	2.98E-01	-1.42E-02
27	Chocolate	317	M	0.9339	1.0022	4.5062	3.8127	258.4202	0.6245	0.5435	2.4939	1.533	261.8766	-1.750333459	2.95E-01	5.15E-01	-2.07E-01
27	Chocolate	319	M	NA	NA	NA	NA	258.1731	NA	NA	NA	NA	NA	-1.305436279	2.30E-01	-6.25E-01	-3.74E-01
27	Chocolate	318	M	0.432	0.7666	6.4794	3.9648	276.3791	0.2785	0.5149	2.2882	1.4794	266.4759	-1.449563272	1.67E-02	-1.47E-01	-2.03E-02
27	Chocolate	361	M	1.0047	1.2792	4.7879	3.5167	250.4237	NA	NA	NA	NA	NA	-2.017337784	5.30E-02	2.84E-01	2.31E-01
27	Chocolate	551	M	1.289	1.4747	4.7587	4.1626	240.2242	0.7927	0.6882	2.418	2.0747	262.9131	-0.457660408	5.61E-01	-4.85E-01	-3.02E-01
27	Chocolate	852	M	0.4674	0.5967	4.9736	4.0119	247.608	0.4245	0.5372	2.636	1.3315	271.0034	-2.444347862	3.48E-01	2.66E-01	1.38E-03
27	Chocolate	853	M	1.0267	1.3083	5.7389	7.0012	257.9193	0.2693	0.5609	1.7135	1.8132	268.299	-0.236624387	1.56E+00	6.07E-01	5.70E-01
27	Chocolate	855	M	0.6005	0.7336	4.3865	3.3203	235.605	0.368	0.4762	2.1888	1.389	234.1813	-2.537612992	5.20E-01	3.10E-01	3.95E-01
19	wt	EB46	F	0.7681	0.7721	6.4329	5.2077	302.482	0.2419	0.4182	2.2151	1.3381	338.5779	-0.86992564	3.62E-01	-1.54E-01	2.11E-01
19	wt	ED120	F	0.1926	0.5064	4.5288	5.3176	308.3947	0.0966	0.2491	0.8521	0.7925	363.5906	-0.943923888	1.90E-01	2.96E-01	-2.29E-01
19	wt	ED96	F	0.834	0.923	6.65	5.536	335.118	0.2706	0.442	1.9837	1.5418	429.4949	-0.98482023	1.42E-01	-6.16E-01	-2.21E-01
19	wt	EE87	F	0.4658	0.8817	6.2202	5.8566	292.4121	0.1615	0.3285	1.477	1.1735	376.0432	-0.752039541	7.89E-01	6.23E-01	7.33E-02
19	wt	EF116	F	0.5467	0.8062	7.5874	6.7177	317.2863	0.096	0.2918	1.5917	1.4801	371.5466	-0.769644823	4.58E-01	-8.70E-03	2.05E-01
19	wt	EF134	F	0.277	0.515	5.9299	4.0035	338.0372	0.1127	0.3007	1.4688	1.0506	395.5779	-0.230282416	6.83E-01	-1.10E-02	6.68E-01
19	wt	EF91	F	1.0444	1.0468	8.2717	9.7721	353.9474	0.2264	0.3537	2.3734	1.6759	408.5535	-2.768509777	3.80E-01	4.26E-01	-4.30E-01
19	wt	EG101	F	1.0228	1.1207	7.3977	6.5677	307.4247	NA	NA	NA	NA	NA	2.152058464	3.06E-01	-9.76E-01	-1.19E+00
19	wt	EG145	F	0.5547	0.7284	7.5477	5.9266	312.9308	0.238	0.3523	1.9671	1.2736	370.5606	-2.136733406	5.59E-01	8.30E-01	-5.20E-01
19	wt	EH117	F	0.8014	1.0847	4.9268	6.0313	292.5269	NA	NA	NA	NA	NA	-0.875997887	2.06E-01	-3.04E-01	-9.67E-02
19	wt	EI38	F	0.7134	0.8792	8.4451	7.1557	338.8629	0.314	0.4278	2.5415	1.7933	439.4822	-0.570928793	8.14E-01	5.76E-01	1.19E-01
19	wt	EJ45	F	0.584	0.7094	6.2805	6.2583	325.0276	0.1306	0.3819	1.8899	1.0514	425.4966	-0.233491302	9.14E-01	6.87E-01	3.41E-01
19	wt	EJ5	F	0.3166	0.4134	6.2448	4.4721	280.419	NA	NA	NA	NA	NA	1.258699025	1.46E+00	7.86E-01	-3.82E-01
19	wt	EJ8	F	0.7215	0.7853	5.6786	5.4211	310.7653	0.1993	0.3785	1.2687	0.9072	376.021	1.57492762	2.03E-02	-1.05E+00	1.08E-01
19	wt	EK108	F	0.5103	0.6676	5.2417	6.4564	300.2437	0.2064	0.4251	1.5024	0.9009	314.0921	0.815216493	9.20E-01	-3.91E-01	-2.76E-02
19	wt	EK128	F	0.8856	0.934	7.8329	6.5775	312.971	0.1944	0.3928	1.7251	1.3426	464.6975	-0.123250926	4.02E-01	-1.20E+00	-1.78E-01
19	wt	EK43	F	0.9055	0.983	6.2621	4.0725	339.3371	0.1904	0.3542	1.7048	1.0237	399.6114	0.225449209	8.21E-01	-1.38E-01	5.91E-01
19	wt	EL100	F	0.4856	0.6507	6.4805	5.5005	349.6174	0.3293	0.4205	2.0056	1.372	404.673	1.455490036	-6.39E-01	-6.85E-01	-7.25E-01
19	wt	EL109	F	0.6141	0.8786	7.2173	4.8219	320.9141	0.12	0.3177	0.9427	0.8989	333.4282	0.532028137	1.40E-01	-3.06E-01	7.81E-01
19	wt	EL30	F	NA	NA	NA	NA	336.4174	NA	NA	NA	NA	NA	-0.276808805	7.01E-01	-1.12E-01	8.09E-01
19	wt	EL66	F	0.0762	0.5491	5.068	3.9564	300.4578	0.0898	0.2901	0.917	0.9193	342.2042	-1.367560964	5.65E-01	1.35E-01	2.80E-01
19	wt	EL85	F	0.2999	0.3769	5.3807	4.6158	351.7048	0.0538	0.323	1.4731	1.282	412.1071	0.551015812	-2.97E-01	1.37E+00	-8.54E-01
19	wt	EL93	F	0.3507	0.4745	5.2577	4.5753	305.8679	0.0833	0.3166	1.8655	1.3124	345.9568	-0.000908775	-6.82E-05	2.09E-07	1.46E-08
19	wt	EM43	F	0.5634	0.6475	4.9197	4.242	292.9212	0.0904	0.3164	1.2147	0.9483	399.5109	0.79992807	7.16E-01	2.34E-01	5.03E-01
19	wt	ER42	F	0.2976	0.4793	6.0766	4.8959	282.2638	0.1428	0.3468	1.3386	0.7229	318.2638	3.872535705	-1.32E+00	4.23E-01	-9.28E-01
19	wt	EU20	F	0.4811	0.7824	6.3719	5.1518	314.4112	0.1706	0.4428	1.5949	1.2728	395.6985	0.873362056	1.06E+00	6.02E-01	7.46E-01
19	wt	EF89	F	0.8411	1.4569	7.5652	7.3525	356.2745	0.2684	0.3464	2.1847	1.587	375.3121	-0.54167251	2.63E-01	3.31E-01	9.42E-01
19	wt	EM14	F	0.7976	1.0452	5.2684	5.6502	361.7135	NA	NA	NA	NA	NA	-0.000908775	-6.82E-05	2.09E-07	1.46E-08
19	wt	EF99	F	0.7917	0.962	5.8457	6.6439	341.5604	NA	NA	NA	NA	NA	-0.401260335	5.59E-01	-3.34E-02	5.22E-01
19	wt	EL34	F	NA	NA	NA	NA	324.4327	NA	NA	NA	NA	NA	-0.833919254	2.62E-02	-1.64E-01	1.17E-01
19	wt	EI103	F	0.4907	0.7288	7.6616	7.7213	332.3129	0.2095	0.3198	2.0567	1.2982	358.713	-0.181179913	5.66E-01	-2.63E-02	-2.40E-01
19	wt	EK37	F	NA	NA	NA	NA	NA	0.238	0.3531	1.6481	1.026	406.4662	-0.317517481	7.74E-02	-9.84E-02	-2.39E-01
19	wt	EE83	F	NA	NA	NA	NA	NA	0.3839	0.4648	2.0536	1.4825	375.7623	1.30795694	4.36E-01	-2.72E-01	-6.09E-01
19	wt	EL61	F	0.8022	0.8522	6.5812	8.1666	380.4674	0.252	0.4471	2.0138	1.0346	448.8203	2.947650173	-6.79E-03	2.82E-01	-1.10E+00
23	wt	DD102	F	0.9022	0.9427	6.1877	6.0583	312.4785	0.2269	0.3864	1.7465	1.4132	386.4346	-1.757422152	2.59E-01	8.58E-01	-2.87E-01
23	wt	DD154	F	1.3099	2.2711	7.6705	6.9957	303.9466	0.6858	0.8356	3.2349	1.6229	379.2773	-1.774359947	2.04E-01	7.76E-01	-7.64E-01
23	wt	DD161	F	0.78	1.5378	5.7227	3.9968	290.2186	0.3563	0.5082	1.922	1.523	348.5686	-0.462782265	1.11E+00	1.14E+00	-4.01E-01
23	wt	DD18	F	0.7935	1.3332	8.1718	10.2994	334.4749	0.3142	0.4079	1.6394	1.7338	324.2309	0.409277205	7.77E-02	-1.49E-01	-2.96E-01
23	wt	DD203	F	0.853	1.4965	7.8953	7.9214	318.0488	0.1754	0.4198	2.1623	1.9472	372.2222	-0.383370582	2.91E-01	-8.46E-01	1.40E+00
23	wt	DD204	F	1.2101	1.214	NA	6.6027	318.9375	0.4785	0.6499	3.1176	1.7044	354.5804	-2.950197936	-1.37E+00	1.05E-01	-1.85E-01
23	wt	DD223	F	0.9696	1.5727	8.1412	8.0627	304.7038	0.399	0.5969	2.4909	1.766	363.2277	-3.00881965	-7.94E-01	-3.50E-01	1.37E-01
23	wt	DD38	F	0.7229	0.7387	5.9329	5.0371	353.5997	0.5472	0.7441	3.5528	1.1275	405.501	-3.664986574	-8.93E-01	-1.32E-01	7.58E-02
23	wt	DD45	F	0.9633	1.322	6.7693	7.0097	342.3765	0.4093	0.7042	3.0272	1.8987	368.868	-3.48981047	-1.01E+00	3.52E-02	-1.30E-01
23	wt	DD69	F	0.8125	1.0387	5.8377	5.3037	279.1049	0.3436	0.5483	2.3543	2.1821	371.316	-2.239839722	-8.22E-01	3.58E-01	-2.14E-01
23	wt	DD86	F	0.834	0.734	NA	6.1408	325.3537	0.3402	0.529	2.5007	1.6479	365.8352	-2.419972834	-1.44E+00	-4.77E-02	-6.06E-02
23	wt	DD98	F	0.9506	1.5854	5.8108	7.0462	292.9347	0.323	0.6189	2.4971	1.8798	349.9917	-2.989310819	-9.93E-01	2.07E-02	-4.62E-02
23	wt	DD99	F	1.5957	2.4257	NA	9.6362	348.8808	0.477	0.6513	4.171	2.3946	406.4017	-2.248658744	-1.45E+00	3.15E-01	-3.55E-01
23	wt	DE105	F	1.1089	1.8514	7.2613	8.5082	357.8892	0.2674	0.4102	1.7925	1.291	323.3366	-2.50409106	-1.20E+00	1.36E-01	-3.60E-01
23	wt	DE119	F	0.6913	1.463	6.0418	6.5229	324.2789	0.4571	0.7832	2.1599	2.0821	386.1932	-3.083375092	-1.00E+00	9.71E-02	-3.79E-01
23	wt	DE121	F	1.2536	1.5895	7.1663	7.2191	309.875	0.2898	0.5452	2.798	1.9327	365.8041	-3.163287937	-9.33E-01	-1.21E-01	-1.33E-01
23	wt	DE123	F	0.8787	0.9421	6.6335	5.7909	326.9684	0.6403	0.607	3.3033	2.2448	368.1595	-3.293834468	-1.29E+00	8.25E-02	-8.06E-01
23	wt	DE124	F	0.8552	1.5839	6.1226	7.8758	283.5789	0.4358	0.4286	2.2961	1.456	397.314	-2.440353962	-9.27E-01	2.78E-01	1.99E-02
23	wt	DE126	F	1.3686	2.2258	6.2619	6.4926	297.1815	0.3704	0.5811	3.0209	1.578	395.2068	-2.768359318	-1.07E+00	-1.16E-01	-4.44E-01
23	wt	DE132	F	0.7998	0.9268	5.8766	6.9899	333.1395	0.6602	0.5364	2.8066	1.5854	328.8229	-3.290089766	-1.19E+00	1.30E-01	-8.17E-01
23	wt	DE38	F	0.9511	1.3951	7.0769	6.5853	308.0943	0.2825	0.3955	1.8442	1.3817	368.7605	-2.183678323	-1.08E+00	-3.59E-01	-5.44E-02
23	wt	DE50	F	1.7197	2.3095	7.3882	7.925	293.9203	0.396	0.63	2.8613	1.5759	410.728	-3.2231226	-1.24E+00	-1.70E-01	4.43E-02
23	wt	DE53	F	1.1252	1.2458	7.4025	7.9817	283.147	0.5111	0.5524	2.6154	1.8913	323.4582	-3.238199785	-1.13E+00	-1.67E-01	-1.30E-01
23	wt	DE64	F	1.4169	2.4672	8.0007	9.6774	365.8188	0.3948	0.4463	2.6552	1.7766	325.6936	-2.668766397	-6.12E-01	3.52E-01	-6.16E-02
23	wt	DE66	F	1.4811	1.5287	NA	6.798	352.5669	0.507	0.8115	3.9808	2.6692	378.8708	-3.486757603	-6.96E-01	-1.67E-01	6.99E-02
23	wt	DE78	F	0.9063	1.3306	6.0769	6.7535	328.9711	0.4128	0.5563	2.4921	2.0489	388.1293	-2.894397596	-1.29E+00	2.17E-01	-3.29E-01
23	wt	DE97	F	0.7108	0.9699	7.5403	6.4527	288.0497	0.498	0.5085	2.514	1.6343	365.5903	-1.678875546	-8.20E-01	4.58E-01	-2.41E-01
23	wt	DB52	F	0.7917	0.7546	7.4308	5.1766	314.9382	0.3051	0.481	2.8159	1.6214	430.4728	-1.210437763	-1.09E+00	5.57E-01	8.97E-02
23	wt	DF87	F	1.2881	0.983	NA	6.5785	358.7326	0.1857	0.3535	2.6162	2.0404	365.7306	0.204661564	-1.66E+00	2.18E-01	-8.73E-01
23	wt	DD170	F	0.9753	1.2203	5.997	5.2893	276.4747	0.3142	0.4079	1.6394	1.7338	324.2309	-1.45096295	-8.22E-01	4.04E-01	-7.82E-02
27	wt	FA23	F	1.3571	1.8029	NA	5.7512	292.0452	0.711	0.6586	2.7717	2.071	310.9002	1.599871387	-2.13E+00	2.61E-02	-1.55E-01
27	wt	FA49	F	1.0081	2.2518	6.7538	8.312	314.3839	0.6094	0.4838	3.8872	2.8822	366.7013	-0.581778107	-1.69E+00	1.03E-01	-1.42E-01
27	wt	FA61	F	0.973	1.8431	6.804	6.4157	310.6153	0.4531	0.6546	3.0795	2.2138	368.5102	-0.613742292	-6.92E-01	1.65E-01	3.34E-02
27	wt	FA62	F	1.4902	2.4625	6.7142	7.2614	307.0701	0.7272	0.8185	3.6531	2.5967	352.2916	0.080110263	-1.59E+00	-1.85E-01	1.91E-01
27	wt	FA63	F	1.268	1.7116	7.6899	6.8362	285.0129	0.5618	0.5237	3.0415	1.8719	313.8433	-0.752217026	-3.03E-01	5.25E-01	-1.99E-01
27	wt	FA64	F	1.0931	2.0162	NA	9.8234	336.472	0.5348	0.6586	2.7804	2.0829	356.2174	-0.71002576	-1.58E+00	-2.38E-01	-8.82E-01
27	wt	FB34	F	1.2647	2.5522	8.0118	9.1095	268.4619	0.7147	0.7724	3.3364	2.8635	348.4098	-1.341890467	-1.53E-01	6.29E-01	1.12E-01
27	wt	FC92	F	1.1299	2.2813	6.586	6.9121	319.3866	0.4689	0.4752	3.6149	3.1007	364.3667	0.870735604	-2.11E+00	-1.51E-01	9.33E-02
27	wt	FD113	F	0.9717	1.619	6.9424	7.0845	304.2815	0.3574	0.5134	2.5249	1.8266	373.6744	-0.80800283	-1.04E+00	1.58E-02	-1.91E-01
27	wt	FD75	F	1.0558	1.6197	6.0861	6.8412	331.8512	0.4523	0.607	3.4271	2.682	334.1781	-0.405537079	-9.42E-01	-3.61E-01	-4.50E-02
27	wt	FE113	F	1.1883	1.8531	6.6391	6.8444	290.8211	NA	NA	NA	NA	NA	1.110859247	-1.71E+00	-1.47E-01	-1.47E-01
27	wt	FE44	F	1.8401	2.6351	8.526	8.6987	344.4231	0.6921	0.6776	3.1584	2.2283	332.9103	0.915118219	-8.35E-01	1.09E-01	1.72E-01
27	wt	FF71	F	0.7956	1.0706	6.6945	6.4113	350.016	NA	NA	NA	NA	NA	-0.491617906	-7.11E-01	4.08E-01	-5.17E-01
27	wt	FG108	F	0.6707	0.7409	NA	5.6568	272.4061	0.2962	0.4415	2.6093	1.9733	341.4006	1.037077117	-1.41E+00	-6.69E-02	-3.45E-01
27	wt	FG112	F	1.0049	1.2126	7.261	6.5919	331.5055	0.388	0.4348	2.8709	1.683	357.6608	-1.209418444	-1.16E+00	-1.78E-01	-2.02E-01
27	wt	FG121	F	1.0484	1.6642	6.8658	8.262	361.6631	0.6502	0.5862	3.197	2.5796	359.7507	0.434031238	-9.62E-01	2.42E-01	5.99E-02
27	wt	FG94	F	1.3682	1.5428	7.1494	7.2831	330.229	0.4888	0.5166	3.0224	2.3202	327.2716	-1.348998608	1.40E-01	-2.27E-02	5.17E-03
27	wt	FH14	F	1.3169	2.0016	6.4655	6.5829	361.8287	NA	NA	NA	NA	NA	-0.536293224	-1.22E+00	1.00E+00	-8.18E-01
27	wt	FH27	F	1.5457	1.5394	9.0641	7.4017	349.3799	NA	NA	NA	NA	NA	-1.08936648	-1.31E+00	-7.45E-02	1.60E-03
27	wt	FH5	F	0.8006	1.1662	5.702	6.7932	300.2195	NA	NA	NA	NA	NA	-1.451133121	-1.44E-01	-6.52E-01	-4.51E-02
27	wt	FH6	F	1.2266	1.6264	7.1494	6.5525	323.4661	0.6911	0.7173	2.9843	2.1107	370.5455	-1.267544372	2.18E-02	3.69E-01	4.47E-01
27	wt	FH65	F	0.6832	1.3243	NA	5.1307	246.5217	NA	NA	NA	NA	NA	-0.131409965	-9.14E-01	-5.22E-01	4.84E-01
27	wt	FH86	F	0.8837	1.389	7.0471	5.1136	265.6339	NA	NA	NA	NA	NA	-0.812782547	-3.86E-01	-4.12E-01	-2.97E-01
27	wt	FE77	F	0.9808	1.664	6.8828	6.2646	344.269	0.366	0.3522	2.2813	1.6521	359.0143	4.965021796	-9.41E-01	-2.85E+00	-1.77E+00
27	wt	FE6	F	0.7881	1.1727	6.5369	5.8121	285.8205	0.3583	0.4495	3.1468	1.9281	410.7704	3.475032661	-5.41E-01	-2.10E+00	-8.87E-01
27	wt	FF124	F	0.8333	0.8465	8.05	6.509	359.9831	0.2793	0.3634	2.7852	1.9345	392.9316	3.512141426	-7.34E-01	-4.30E-02	7.84E-02
27	wt	FF149	F	0.6486	1.078	6.7742	6.0886	340.0801	0.3166	0.3325	2.9486	2.1694	380.8633	2.423340296	-1.65E+00	1.37E-01	1.84E+00
27	wt	FG102	F	NA	NA	NA	NA	283.2692	0.5358	0.5523	2.839	2.087	323.7241	4.066522555	-7.61E-01	-7.54E-01	-7.29E-01
27	wt	FH17	F	0.7878	1.1984	7.0196	8.8678	333.7665	NA	NA	NA	NA	NA	3.320271886	-7.76E-01	-1.83E-01	-1.64E-01
27	wt	FH61	F	0.9725	1.0439	NA	4.8651	339.9422	0.2997	0.4696	2.6248	1.4121	390.7776	2.973936257	-9.68E-01	-2.94E-02	-1.27E-01
27	wt	FH32	F	0.6707	1.1065	6.0289	7.7915	271.239	0.2993	0.4428	2.2867	1.5293	317.9334	0.327135899	-1.86E-01	2.11E-01	-2.82E-01
27	wt	FD103	F	NA	NA	NA	NA	NA	0.7319	0.6929	3.3278	3.1007	350.3636	4.055422541	-1.14E+00	-8.61E-01	7.93E-03
27	wt	FF148	F	NA	NA	NA	NA	NA	0.3164	0.4544	2.2534	1.5141	311.4371	3.633228806	-3.69E-01	-4.46E-01	-3.27E-01
27	wt	FH75	F	NA	NA	NA	NA	NA	0.6126	0.753	2.8367	1.8131	396.907	2.866908705	-1.59E+00	-6.22E-02	-1.66E-01
27	wt	FG110	F	NA	NA	NA	NA	NA	0.4315	0.476	3.5501	2.4843	365.2141	1.661526909	-1.88E+00	2.46E+00	7.89E-01
27	wt	FH10	F	NA	NA	NA	NA	NA	0.6946	0.7537	3.789	2.9269	380.7341	3.045938019	-1.56E+00	1.09E+00	1.08E+00
27	wt	FH3	F	NA	NA	NA	NA	NA	0.4134	0.5348	3.1176	2.4828	372.2412	3.463411389	-1.97E+00	1.74E+00	1.81E+00
27	wt	FH71	F	NA	NA	NA	NA	NA	0.7435	0.6704	3.4102	2.2659	357.072	3.246196398	-4.96E-01	-6.29E-01	-2.26E-01
19	wt	240	M	0.0357	0.321	1.9151	3.0231	290.625	NA	0.1127	0.5054	0.6867	304.5	4.399542572	-2.29E+00	-1.01E+00	-5.53E-02
19	wt	655	M	0.0797	0.3393	1.5442	1.4258	325.8679	0.0655	0.2572	0.5484	0.6312	393.5441	5.515392119	-2.42E+00	1.09E+00	-3.49E-01
19	wt	803	M	0.078	0.2364	1.4497	1.239	247.8293	NA	NA	NA	NA	NA	1.140077097	-6.05E-01	1.07E+00	-1.88E-02
19	wt	825	M	0.1153	0.487	3.5146	2.8458	352.1368	NA	0.3347	0.9204	0.6664	368.3639	4.871132349	-1.97E+00	1.14E-01	1.89E-01
19	wt	900	M	0.2903	0.7559	2.9786	4.4857	358.6763	NA	NA	NA	NA	NA	2.073379781	-2.42E+00	1.07E+00	-4.75E-01
19	wt	919	M	0.3424	0.5973	3.5278	3.5491	255.6495	NA	NA	NA	NA	NA	3.692156894	-2.23E+00	-2.79E-01	-6.17E-01
19	wt	923	M	0.554	0.4472	2.371	2.2824	266.5029	NA	NA	NA	NA	NA	1.111123369	-1.56E+00	4.64E-01	3.94E-03
19	wt	924	M	0.2596	0.4024	3.1112	2.4523	287.0376	NA	NA	NA	NA	NA	2.903531821	-1.44E+00	6.68E-01	-6.51E-01
19	wt	826	M	0.1215	0.4805	2.1478	3.0106	270.1853	0.0866	0.4931	1.1282	0.8637	377.9587	3.392218641	-1.43E+00	6.36E-01	-3.21E-01
19	wt	948	M	0.3982	0.5402	2.3719	2.6371	290.3474	NA	0.4647	0.743	0.4598	279.079	0.414958022	-1.42E+00	-2.51E-02	1.18E+00
19	wt	949	M	0.1284	0.2897	1.6347	1.6837	253.7947	0.0554	0.2793	0.5602	0.654	274.9208	2.907703353	-2.11E-01	1.81E-01	3.32E-01
19	wt	977	M	0.0915	0.3858	1.8984	2.162	280.8594	0.0694	0.4213	0.5997	0.5839	326.4361	1.714876995	-1.28E+00	-3.04E-01	7.64E-02
23	wt	100	M	0.4971	0.5878	3.6217	3.4181	307.4186	0.2864	0.4868	0.9082	1.3469	299.8059	5.75744548	-2.54E+00	4.35E-01	8.01E-02
23	wt	101	M	0.7712	0.7696	3.3962	3.905	302.2655	0.2576	0.4021	0.963	0.8539	274.6102	2.676738625	-2.17E+00	1.31E+00	1.03E+00
23	wt	102	M	0.8812	1.032	5.1995	3.9957	357.4461	0.3411	0.5987	1.8939	1.4726	369.8834	2.143841102	-1.22E+00	1.13E+00	6.98E-01
23	wt	104	M	0.5842	0.7632	2.6972	2.9227	330.9681	0.1606	0.5224	1.4012	1.0433	352.6784	2.028597313	-2.77E+00	2.47E-01	2.76E-01
23	wt	120	M	0.6936	0.7701	4.5173	4.9086	291.0996	0.4955	0.5784	1.3382	1.1102	340.1346	2.568359756	-1.41E+00	7.21E-01	-2.72E-01
23	wt	123	M	0.8644	1.1307	4.0836	3.6331	323.9974	0.5	0.8028	1.8523	1.5154	284.1909	2.117878909	-1.34E+00	-3.42E-01	4.70E-01
23	wt	125	M	0.6644	0.6234	4.1867	4.1011	274.0223	NA	0.4502	1.5239	1.3295	343.7917	0.894585265	-1.54E+00	5.74E-01	-4.37E-01
23	wt	130	M	0.5481	0.7544	2.56	3.3352	266.2898	0.1982	0.3435	1.0031	1.0248	259.8616	0.883860798	-8.73E-01	4.39E-01	-1.20E-01
23	wt	164	M	0.4983	0.6287	3.2597	2.8287	312.6519	0.1841	0.4327	1.4941	1.1735	328.0419	3.644984622	-2.39E+00	-6.33E-02	1.01E+00
23	wt	166	M	0.6685	0.6135	2.6144	3.2157	272.7595	0.302	0.4594	1.6193	1.1118	272.7321	2.346869223	-2.42E+00	-3.71E-01	3.39E-01
23	wt	169	M	0.1902	0.7487	3.7582	2.804	278.5629	0.1578	0.5634	1.2293	1.0715	282.3365	3.392160688	-1.80E+00	1.33E-01	-3.50E-01
23	wt	170	M	0.5337	0.6223	3.3473	3.0944	255.3378	0.0706	0.39	1.22	0.9212	273.8106	1.950738309	-1.06E+00	-3.68E-01	-1.36E-01
23	wt	173	M	0.9066	1.3009	4.2492	4.4228	312.8125	0.5378	0.5509	2.125	1.5069	310.625	1.349065385	-1.10E+00	2.22E-01	-2.46E-01
23	wt	197	M	0.7528	1.2896	5.6705	4.7075	311.5393	0.4895	0.8523	2.739	1.7222	378.7527	2.952430182	-2.58E+00	4.82E-01	-1.72E-01
23	wt	198	M	1.483	2.4733	6.3872	5.6834	312.2977	0.2584	0.8996	2.9227	2.1395	402.0889	1.678936518	-2.19E+00	-2.11E-01	1.11E+00
23	wt	202	M	0.9152	0.9113	3.2856	2.8557	250.891	0.3472	0.5118	2.0692	1.4684	273.6993	0.635779076	-2.27E+00	7.68E-01	3.76E-01
23	wt	203	M	0.723	0.8483	4.8534	2.8742	342.7222	0.3897	0.6481	1.8547	1.4159	337.3472	1.592857327	-2.36E+00	-2.50E-01	-2.98E-01
23	wt	289	M	0.8934	1.1329	4.3944	3.9325	288.1371	0.4541	0.696	1.9982	1.5215	271.1432	-1.785599766	5.26E-01	5.76E-01	-6.28E-01
23	wt	292	M	0.9313	1.3804	5.3881	4.537	309.6181	0.4969	0.8665	1.9678	1.2083	304.6528	-3.226149564	8.10E-01	3.41E-02	3.51E-01
23	wt	293	M	0.3255	0.4448	3.1282	2.0795	288.7574	0.233	0.4326	2.044	0.8815	256.8047	-0.000908775	-6.82E-05	2.09E-07	1.46E-08
23	wt	294	M	0.7366	0.8981	3.7132	4.1525	288.5233	NA	NA	NA	NA	NA	-0.447468401	1.34E+00	8.59E-01	2.66E-01
23	wt	295	M	0.4151	0.4954	2.892	3.0069	260.0694	0.2785	0.392	NA	NA	265.0278	-1.310380803	1.04E+00	9.88E-01	-3.98E-01
23	wt	43	M	0.1494	0.617	3.046	3.0835	289.5365	0.1554	0.3205	0.9428	0.8077	306.3074	0.438031726	1.22E+00	2.25E+00	-2.58E+00
23	wt	443	M	0.5473	0.7255	3.3746	2.7053	253.6944	0.2913	0.4614	1.5649	1.203	299.9591	-1.907154264	1.79E+00	1.08E+00	-2.31E-01
23	wt	444	M	0.5057	0.7282	2.8883	3.2988	262.9683	0.1946	0.2775	1.3489	0.977	302.7758	-0.204930844	9.83E-01	1.59E+00	-6.50E-01
23	wt	446	M	0.6562	0.8825	6.0774	4.8251	298.6213	0.3308	0.5212	1.8047	1.4661	318.417	-3.605561127	-2.59E-01	-2.23E-01	1.64E-01
23	wt	51	M	0.9799	1.2559	4.6337	4.1827	325.2446	0.3443	0.5353	1.7752	1.5761	319.8886	-1.431443142	1.17E+00	5.98E-01	-2.96E-01
23	wt	617	M	1.099	1.8084	6.6566	6.8993	333.8155	0.362	0.6364	2.2589	1.6672	411.7467	-2.432361883	6.32E-01	8.20E-01	-6.83E-01
23	wt	97	M	0.8661	1.278	4.2547	3.2973	264.8794	0.2645	0.6063	1.85	1.5496	311.788	1.924119511	-8.06E-02	-4.88E-01	-4.77E-02
23	wt	98	M	0.6299	0.7963	4.1136	2.8839	343.5897	0.3653	0.4756	1.5284	1.1161	331.3609	1.859105979	2.11E+00	3.54E-01	3.62E-01
27	wt	1353	M	1.2788	1.1423	3.3324	2.8698	220.1898	NA	NA	NA	NA	NA	3.569213154	1.02E+00	-8.37E-01	-2.43E-01
27	wt	1355	M	0.6575	0.7841	4.3612	3.5365	287.048	0.28	0.5925	2.0909	1.2378	284.1406	-1.392117323	6.42E-01	1.10E+00	-1.45E-01
27	wt	1369	M	1.6453	1.6851	3.9927	4.0056	253.6668	0.5484	0.6951	2.2859	1.6065	280.8563	-0.344861288	1.70E+00	1.61E+00	5.21E-01
27	wt	1370	M	0.9168	1.6822	4.4381	3.6211	253.675	NA	NA	NA	NA	NA	-1.025372117	5.11E-01	1.56E-01	7.48E-01
27	wt	1425	M	0.8245	0.9571	4.3815	3.1278	248.4061	0.516	0.4742	2.0136	1.4392	263.1344	-0.591596355	1.87E+00	1.77E+00	-7.27E-01
27	wt	2445	M	1.1353	1.6182	5.2027	3.9145	282.1682	0.6796	0.6312	2.3579	1.3764	324.2595	3.314022754	4.24E-01	-6.28E-01	-7.05E-01
27	wt	309	M	0.5735	1.5012	4.3234	4.5645	283.0249	0.5501	0.7498	2.0341	1.6494	315.3826	3.155700171	-9.19E-01	1.66E+00	1.18E+00
27	wt	353	M	0.973	1.4599	4.1412	4.7793	276.5556	0.5648	0.6481	2.3171	1.7299	266.4375	3.808125863	2.18E+00	-1.67E-02	1.31E-01
27	wt	354	M	1.1654	1.1323	4.3571	3.9736	287.4637	0.6573	0.5452	2.6772	1.7454	288.7135	7.552658796	3.00E+00	-1.34E+00	9.40E-01
27	wt	355	M	1.0165	0.9188	4.3932	2.5884	237.4172	0.5067	0.5853	2.4877	1.3705	235.0272	3.382039272	1.94E+00	2.00E+00	8.36E-01
27	wt	357	M	1.1006	2.3555	6.5324	5.4131	305.0625	0.5235	0.5625	2.5154	1.78	316.4585	1.194022174	9.89E-01	1.11E+00	1.23E-01
27	wt	358	M	1.2888	1.5753	3.2437	3.7758	221.1197	0.3579	0.4895	2.2599	1.7342	225.9227	-0.000908775	-6.82E-05	2.09E-07	1.46E-08
27	wt	406	M	0.7762	0.8843	4.1983	4.9182	190.2114	0.3341	0.4182	1.3704	0.9838	202.7222	7.131932482	9.64E-01	-5.78E-01	4.24E-01
27	wt	533	M	1.1524	1.3988	5.5116	5.2043	265.2136	0.512	0.589	2.7783	1.8795	270.9555	3.602923221	1.81E+00	1.57E-01	7.47E-02
27	wt	534	M	1.1322	1.3218	4.9146	3.3095	327.4776	0.5394	0.6699	1.9442	1.7036	329.3766	4.08697178	1.66E+00	1.69E+00	-2.50E-01
27	wt	535	M	1.2601	1.4279	4.3749	4.339	262.4075	0.5705	0.504	2.1098	1.6323	268.3484	5.788918386	1.33E+00	3.30E-01	-1.18E-01
27	wt	833	M	0.7263	0.6356	4.2485	3.6273	241.9207	0.2696	0.4462	1.7254	1.2447	235.2254	2.20637747	1.51E-01	5.49E-01	-1.39E+00
27	wt	1264	M	0.87	1.4583	3.7725	5.6958	262.2741	0.6796	0.4611	2.8401	1.7532	228.9566	5.827418265	1.20E+00	3.81E-01	3.64E-01
27	wt	1265	M	1.0834	1.4739	5.0096	4.1172	243.7382	0.5784	0.651	3.0844	1.818	258.8097	7.909528336	9.25E-01	-1.23E-01	-5.37E-01
27	wt	1266	M	1.3378	1.7302	5.1024	5.2067	272.5806	0.4382	0.7744	3.0182	1.6307	292.8617	5.433475677	1.73E+00	9.41E-01	-8.93E-01
27	wt	1267	M	1.4268	1.5622	4.4183	4.5669	291.6933	0.6611	0.7192	2.5555	1.8304	288.4568	2.966121591	2.20E+00	1.68E+00	-3.65E-01
27	wt	1268	M	1.766	1.8727	5.5492	4.3949	295.6971	0.9031	0.8949	3.445	1.7085	269.4436	6.520825578	1.34E+00	-5.98E-02	-4.18E-01
27	wt	1269	M	1.3693	0.9123	5.8141	4.5081	295.194	0.651	0.7938	3.6509	1.9821	298.4002	3.607809772	2.83E+00	2.61E+00	-6.13E-01
27	wt	1270	M	1.298	1.3753	5.9273	5.8144	264.1073	0.4016	0.5752	2.8279	1.6775	268.432	3.089684658	-2.39E-01	1.38E+00	1.57E+00
27	wt	1277	M	1.2412	1.485	3.396	3.239	235.5242	0.6431	0.6423	2.3782	1.5426	221.0871	3.7561199	1.62E+00	1.02E-01	-1.64E-01
27	wt	1278	M	1.0124	1.4517	4.7513	3.5952	281.6924	0.4925	0.5606	2.0671	1.1262	233.9003	6.690630305	7.53E-01	-1.05E+00	-5.26E-01
27	wt	1279	M	1.3809	1.1363	4.2249	3.6059	293.17	0.8851	0.5542	2.4827	2.064	275.85	4.180898443	2.85E+00	7.41E-01	-2.01E-01
27	wt	1330	M	0.612	0.8425	3.6988	2.7013	222.4852	0.1623	0.2808	1.7687	1.418	226.167	5.909977553	2.67E+00	-9.47E-01	5.77E-01
27	wt	1331	M	1.5456	1.4276	6.2271	4.4282	286.2369	NA	NA	NA	NA	NA	3.207462873	2.05E+00	5.81E-01	5.94E-01
27	wt	1353	M	1.2925	1.3698	3.2587	3.5617	208.8452	0.4048	0.5547	2.2795	1.5426	257.1976	5.239440431	3.40E-03	1.77E+00	1.37E+00
27	wt	1354	M	1.272	1.6789	6.4434	4.3247	238.3817	NA	NA	NA	NA	NA

## Sheet: alleles
Temperature	Genotype	Phenotype	ID	Gender	eA_black	eA_gold	eP_black	eP_gold	forewing	e2_black	e2_gold	e5_black	e5_gold	hindwing
19	Frodo	WT	1002	M	0.1865	0.4021	2.4064	2.7778	274.128	0.1274	0.3246	0.6967	0.6507	298.2228
19	Frodo	WT	1013	M	0.0597	0.2389	2.1057	1.8482	275.839	0.0242	0.1542	0.8022	0.7312	276.485
19	Frodo	WT	1014	M	0.0827	0.2598	2.3509	1.5855	294.577	0.0359	0.1927	0.7171	0.5914	270.9466
19	Frodo	WT	1071	M	0.0482	0.2367	2.2735	2.0785	274.097	NA	0.1493	0.5103	0.642	307.9424
19	Frodo	WT	1090	M	0.196	0.4634	2.0599	2.1861	354.644	0.0857	0.3047	0.8514	0.7832	367.2771
19	Frodo	WT	1091	M	0.0723	0.2266	2.5763	1.2709	269.377	0.046	0.225	0.6568	0.5928	268.6677
19	Frodo	WT	1122	M	0.1921	0.4713	2.7618	1.9507	268.466	0.067	0.2978	1.1364	0.757	261.3402
19	Frodo	WT	1125	M	0.0436	0.3309	2.3736	2.0532	301.704	0.0145	0.1646	0.8846	0.9749	323.837
19	Frodo	WT	1154	M	0.2228	0.59	2.8893	3.8038	279.855	0.0912	0.2155	0.7942	0.7118	297.6369
19	Frodo	WT	1195	M	0.0944	0.3071	2.8678	1.8579	306.271	0.0993	0.2529	0.734	0.8153	351.4331
19	Frodo	WT	1244	M	0.1372	0.3527	1.4535	2.2025	268.916	0.0654	0.163	0.7007	0.6578	298.8644
19	Frodo	WT	2468	M	0.0725	0.3577	1.865	1.231	262.264	0.0332	0.1177	0.5283	0.6295	281.3519
19	Frodo	WT	375	M	0.0635	0.2634	2.2567	2.1766	238.924	0.2206	0.8792	0.3285	0.5277	261.8052
19	Frodo	WT	523	M	0.0086	0.2442	1.424	1.4723	296.241	0.0499	0.2278	0.5789	0.4635	306.3949
19	Frodo	WT	986	M	0.1351	0.3069	1.7372	1.4764	239.888	0.0744	0.1842	0.6453	0.531	252.0906
19	Frodo	WT	1012	F	0.1358	0.3921	7.0856	6.873	382.124	0.0184	0.1443	0.8172	0.8847	429.2785
19	Frodo	WT	1016	F	0.5438	1.2078	3.9075	3.7117	347.391	0.2598	0.5977	0.3574	0.4213	370.1008
19	Frodo	WT	1029	F	0.167	0.3753	5.9993	4.8118	370.775	0.0577	0.238	0.9238	0.8177	393.6956
19	Frodo	WT	1030	F	0.6199	1.0295	5.4827	5.5525	348.692	0.1461	0.3013	1.4663	1.069	388.5042
19	Frodo	WT	1164	F	0.1962	0.4704	6.1789	5.4655	374.14	0.055	0.1888	0.867	0.8177	436.9619
19	Frodo	WT	1245	F	NA	NA	NA	NA	NA	0.0918	0.2601	1.3319	1.7459	442.1015
19	Frodo	WT	132	F	0.0858	0.401	4.6144	6.1343	389.819	NA	NA	NA	NA	NA
19	Frodo	WT	227	F	0.119	0.7159	7.0443	6.3587	340.312	0.0499	0.2068	0.8239	0.7194	380.7185
19	Frodo	WT	2471	F	0.0936	0.2177	4.5559	5.0755	350.972	0.1002	0.2947	1.8965	1.0008	344.5686
19	Frodo	WT	2472	F	0.0355	0.1655	4.6827	4.6794	375.351	0.0851	0.1932	0.9215	0.8287	327.1208
19	Frodo	WT	2475	F	0.2494	0.5286	6.5906	4.8691	379.201	0.096	0.4899	0.5819	0.6392	372.4238
19	Frodo	WT	339	F	0.0778	0.2127	4.6515	4.5459	339.061	NA	NA	NA	NA	NA
19	Frodo	WT	340	F	0.1508	0.2603	4.9125	5.1498	338.047	NA	NA	NA	NA	NA
19	Frodo	WT	376	F	0.1053	0.2996	6.1406	4.7829	321.184	0.0309	0.1248	0.9519	0.7436	350.1436
19	Frodo	WT	398	F	0.0543	0.4491	4.0205	4.6741	336.726	0.0272	0.166	NA	0.4144	319.4859
19	Frodo	WT	424	F	0.096	0.4294	5.5333	6.1685	333.708	0.01	0.2332	0.5198	0.5496	406.1273
19	Frodo	WT	467	F	0.0772	0.8568	5.9886	5.0813	326.673	0.0713	0.1864	1.4236	0.9437	306.9471
19	Frodo	WT	525	F	0.0833	0.3476	7.5041	5.1101	365.135	0.118	0.2695	1.0201	0.715	346.839
19	Frodo	WT	526	F	0.0577	0.2341	4.8321	3.5423	360.944	0.0531	0.3917	0.3574	0.781	410.0644
19	Frodo	WT	607	F	0.1389	0.4499	5.8092	5.2164	337.683	0.0801	0.1635	0.8514	0.884	389.3228
19	Frodo	WT	719	F	0.2122	0.2419	5.8277	5.0958	354.68	NA	0.1451	1.0518	0.5977	364.5954
19	Frodo	WT	885	F	0.1346	0.408	4.6412	2.7652	300.855	0.0977	0.257	0.7356	0.6174	362.997
19	Frodo	WT	984	F	0.2271	0.4853	5.3354	5.2956	334.119	0.025	0.1514	0.7857	0.6351	388.5272
23	Frodo	WT	1972	M	0.1212	0.3775	2.9865	2.9535	218.23	NA	0.2317	1.0413	0.8326	224.2386
23	Frodo	WT	1973	M	0.086	0.2975	2.3403	2.2574	236.22	0.0552	0.213	0.965	0.8222	259.6405
23	Frodo	WT	1974	M	0.774	0.9354	5.9013	3.8917	330.026	0.3801	0.6634	2.0476	1.5084	353.0733
23	Frodo	WT	1975	M	0.364	0.5932	3.7351	3.5197	233.426	NA	NA	NA	NA	NA
23	Frodo	WT	2006	M	0.6302	0.5978	4.2394	3.8884	255.995	0.4317	0.603	1.9419	1.3578	240.7454
23	Frodo	WT	2052	M	NA	NA	NA	NA	NA	0.3842	0.4883	2.2598	1.5536	275.8458
23	Frodo	WT	2053	M	0.1698	0.388	3.2724	2.8923	247.662	0.2428	0.3047	1.3981	0.872	265.6759
23	Frodo	WT	2054	M	NA	NA	NA	NA	NA	0.2526	0.5319	1.7005	1.0678	302.736
23	Frodo	WT	2145	M	0.0274	0.272	1.937	3.334	254.418	0.0404	0.1856	0.9725	0.9556	258.0788
23	Frodo	WT	2181	M	0.6473	0.795	3.5318	2.715	279.884	0.2776	0.4633	1.6981	1.3438	296.896
23	Frodo	WT	2182	M	0.6416	0.6263	5.2387	4.535	306.687	NA	NA	NA	NA	NA
23	Frodo	WT	2207	M	0.1192	0.483	2.231	2.1216	192.83	0.0506	0.24	1.077	0.5947	197.646
23	Frodo	WT	2208	M	0.2185	0.5204	3.6211	2.6926	259.374	NA	0.3979	1.6658	1.0494	345.235
23	Frodo	WT	2209	M	0.6983	0.7157	3.835	3.6128	285.665	0.2706	0.5547	1.8393	1.2125	301.2831
23	Frodo	WT	2268	M	0.6438	0.8502	5.4834	3.8121	301.627	0.3445	0.5348	2.0649	1.3789	325.1356
23	Frodo	WT	2269	M	0.6257	0.6415	6.1889	4.6069	255.621	0.5149	0.6223	2.481	1.4987	292.6976
23	Frodo	WT	2274	M	0.6304	0.9184	5.8402	4.2219	269.346	0.3776	0.4923	1.7509	1.3467	280.4407
23	Frodo	WT	2287	M	0.4447	0.5876	4.5753	3.7715	303.702	NA	0.3898	2.2429	1.1799	304.5301
23	Frodo	WT	2288	M	0.3436	1.1085	5.4029	4.0857	287.443	0.3269	0.5475	2.9058	1.3386	256.3063
23	Frodo	WT	2289	M	0.1841	0.6864	4.0143	3.6271	308.51	0.0992	0.3745	2.2861	1.1768	301.583
23	Frodo	WT	2290	M	0.5722	0.6223	4.7811	3.5883	238.569	0.3156	0.5641	2.2001	1.2744	289.1238
23	Frodo	WT	2291	M	0.2808	0.508	3.2788	3.0118	267.567	0.1611	0.2532	1.4472	0.9177	281.234
23	Frodo	WT	2292	M	NA	NA	NA	NA	NA	0.4503	0.5278	2.7013	1.5294	349.3108
23	Frodo	WT	2361	M	0.2333	0.6872	3.5485	3.5279	210.615	0.1666	0.4134	1.5505	0.7602	285.5933
23	Frodo	WT	2363	M	0.8575	0.8762	4.3023	3.7241	266.67	0.4955	0.5399	2.6841	1.5184	271.1432
23	Frodo	WT	2364	M	0.4174	0.4814	3.6258	2.6006	261.017	NA	0.3893	2.0029	1.3576	253.4401
23	Frodo	WT	2365	M	0.7344	0.6134	3.811	4.0257	281.562	NA	NA	NA	NA	NA
23	Frodo	WT	2370	M	0.6951	0.754	3.4748	2.9774	294.394	0.3472	0.5993	2.0242	1.3465	304.739
23	Frodo	WT	2371	M	0.3571	0.4658	2.8621	2.5733	247.579	0.1214	0.3372	1.5314	1.0276	283.3438
23	Frodo	WT	2384	M	0.9498	0.8157	4.5602	3.539	279.216	0.4697	0.5261	2.1321	1.3656	307.9389
23	Frodo	WT	2385	M	0.434	0.7213	4.711	3.4033	290.771	0.461	0.7506	2.9637	1.4632	345.5314
23	Frodo	WT	2387	M	0.3761	0.6221	3.5549	3.3112	282.922	0.2849	0.5158	1.2624	0.826	327.9349
23	Frodo	WT	2388	M	0.849	0.7651	4.9256	3.397	253.735	0.414	0.4495	2.924	1.2284	309.2152
23	Frodo	WT	2392	M	0.3846	0.6496	3.8191	2.6437	261.089	0.2386	0.4357	1.8409	0.9775	288.5665
23	Frodo	WT	2394	M	0.2293	0.7395	4.3245	4.6038	315.087	0.2198	0.4436	2.3583	1.3474	337.433
23	Frodo	WT	2406	M	0.5478	0.6954	4.0855	2.9058	285.811	0.2959	0.4083	1.6581	1.0577	287.1059
23	Frodo	WT	2409	M	1.1285	1.0105	5.5847	5.0828	286.26	0.7618	0.6378	3.1138	1.8279	293.8703
23	Frodo	WT	2411	M	0.7261	0.7142	4.6069	3.889	295.521	0.4299	0.5115	2.1531	1.3854	299.0088
23	Frodo	WT	2412	M	0.7297	0.6768	4.04	3.7753	253.727	0.1013	0.5993	2.322	1.6237	248.4719
23	Frodo	WT	2413	M	0.431	0.6384	4.4295	3.4427	294.337	NA	0.6048	1.9423	1.5814	325.4463
23	Frodo	WT	1917	F	0.7618	1.1945	7.1352	9.9953	376.754	NA	0.4619	3.0298	1.7976	361.6885
23	Frodo	WT	1919	F	0.0993	0.4334	7.4784	6.9344	358.013	0.0428	0.1977	1.0688	0.8361	357.8529
23	Frodo	WT	1921	F	0.1146	0.4374	5.9538	5.0499	359.771	0.0533	0.2486	0.6618	0.5997	386.174
23	Frodo	WT	2001	F	0.8625	1.3444	7.559	8.113	328.589	0.3376	0.5939	2.8721	2.1915	359.3204
23	Frodo	WT	2002	F	0.6237	0.9458	5.1315	5.9242	294.013	0.1825	0.3103	1.7378	1.1498	289.7425
23	Frodo	WT	2003	F	0.4185	0.715	NA	NA	313.545	0.2848	0.4878	2.2662	1.3616	365.906
23	Frodo	WT	2005	F	0.6295	0.6836	6.6083	5.9603	354.78	0.3366	0.4471	2.606	1.4882	327.7812
23	Frodo	WT	2041	F	0.089	0.3425	6.0625	4.2914	291.761	0.0468	0.2684	1.9155	0.9535	316.8019
23	Frodo	WT	2044	F	0.3621	0.6494	5.4162	5.7668	333.773	0.0903	0.4007	1.7997	0.8514	364.8295
23	Frodo	WT	2045	F	0.4455	0.5587	5.0467	6.4332	302.603	0.2302	0.2255	1.3046	0.8341	300.1943
23	Frodo	WT	2047	F	0.2428	0.465	5.3331	6.4408	347.074	0.165	0.3888	1.5592	0.9197	320.9649
23	Frodo	WT	2049	F	0.9205	1.2989	7.6334	9.9361	376.382	0.0143	0.4563	2.9883	2.3741	417.5172
23	Frodo	WT	2051	F	0.3574	1.0463	6.8358	6.3715	350.972	0.1756	0.4276	2.315	1.0728	342.377
23	Frodo	WT	2059	F	0.438	0.6054	6.1908	8.1428	319.537	0.1738	0.296	1.8234	1.4164	324.7356
23	Frodo	WT	2066	F	0.1427	0.3545	5.9568	5.8663	346.095	0.0622	0.3246	1.217	0.9285	343.7128
23	Frodo	WT	2109	F	0.4372	0.6102	7.0875	6.0075	378.082	NA	0.3285	1.5346	1.0236	377.925
23	Frodo	WT	2144	F	0.1826	0.3268	4.6801	4.0597	246.94	0.0808	0.1426	1.0936	0.797	278.7707
23	Frodo	WT	2172	F	0.7998	0.8143	8.2096	8.3597	360.744	0.276	0.4003	2.5116	1.2437	351.4971
23	Frodo	WT	2174	F	0.8546	0.6935	7.316	7.5041	334.219	0.3142	0.3793	2.2337	1.5211	339.2327
23	Frodo	WT	2195	F	0.8248	0.8264	8.396	6.7956	381.445	0.2454	0.481	3.2154	1.5189	367.1358
23	Frodo	WT	2197	F	0.4891	0.7223	6.1354	8.53	346.609	NA	0.2244	2.1807	1.0758	335.5824
23	Frodo	WT	2199	F	0.9693	1.2526	6.1572	6.6487	388.288	0.3349	0.5319	2.5665	1.5157	345.1705
23	Frodo	WT	2211	F	0.6713	0.661	6.9986	5.345	376.425	0.2682	0.4642	2.2321	1.2672	419.1454
23	Frodo	WT	2213	F	1.6941	2.3852	8.0214	10.0869	373.626	0.688	0.615	3.5295	1.7885	339.3612
23	Frodo	WT	2219	F	0.5832	0.7689	8.0397	7.1946	411.918	0.2944	0.4396	3.0502	1.4092	394.5646
23	Frodo	WT	2220	F	0.3292	0.7244	6.3443	7.348	384.32	0.1708	0.4113	2.226	1.1165	416.5714
23	Frodo	WT	2267	F	0.5454	0.6039	6.1289	7.5201	342.419	0.2661	0.3574	2.2971	1.6799	379.4334
23	Frodo	WT	2270	F	0.93	1.0566	6.5807	10.0398	357.677	0.2885	0.4312	3.3095	1.5347	368.8508
23	Frodo	WT	2275	F	0.6432	0.7215	6.2201	6.2169	351.272	0.3349	0.5432	2.6827	1.0702	353.0152
23	Frodo	WT	2293	F	0.7923	1.2693	4.4055	6.1633	400.962	0.3503	0.624	2.7151	1.4138	426.0408
23	Frodo	WT	2366	F	0.4385	0.5774	6.9783	5.1934	341.97	NA	NA	NA	NA	NA
23	Frodo	WT	2367	F	0.8773	0.8837	6.6414	8.2499	377.399	NA	NA	NA	NA	NA
23	Frodo	WT	2396	F	0.25	0.3967	6.313	5.0506	353.116	0.0944	0.4602	2.125	1.1894	369.4124
23	Frodo	WT	2407	F	1.1261	1.3366	7.5036	9.1459	361.315	0.4045	0.5027	2.8944	2.0589	381.7202
23	Frodo	WT	2414	F	0.7996	0.836	8.4446	7.8685	345.543	0.4588	0.4789	3.07	1.5502	348.4828
23	Frodo	WT	2415	F	1.2385	1.814	8.1092	9.0231	382.49	0.574	0.6008	3.6142	2.4064	388.9197
27	Frodo	WT	1414	M	0.6829	1.0206	3.5566	3.0095	201.545	0.3821	0.4804	1.3045	1.3582	230.8339
27	Frodo	WT	1452	M	0.6368	2.5609	4.1694	6.4155	246.588	0.8297	0.8926	2.5326	2.376	212.136
27	Frodo	WT	1456	M	0.3688	0.6731	4.3356	3.5923	202.555	0.4165	0.5246	1.5512	1.1775	197.6377
27	Frodo	WT	1486	M	1.0172	0.9598	6.0254	4.0303	274.136	0.6708	0.7126	2.6412	1.6034	291.0567
27	Frodo	WT	1491	M	0.6492	1.0021	3.4576	3.1407	220.102	0.3622	0.4972	2.0181	0.9055	230.2814
27	Frodo	WT	1492	M	1.4713	1.8296	5.8626	5.3219	292.16	0.6618	0.5198	2.7747	1.7368	300.2809
27	Frodo	WT	1548	M	0.9023	1.1404	4.8449	3.9958	279.507	0.502	0.8466	2.7844	1.958	256.4663
27	Frodo	WT	1552	M	1.2857	1.5504	4.9256	4.4066	262.699	0	0.5383	2.9805	1.7231	264.5217
27	Frodo	WT	1553	M	1.0165	1.2291	6.1456	3.977	236.353	0.5626	0.5777	3.1208	1.5695	259.6628
27	Frodo	WT	1554	M	0.6206	0.8539	4.0031	3.4373	224.847	NA	NA	NA	NA	NA
27	Frodo	WT	1654	M	0.948	1.4598	4.9757	5.1481	267.899	0.5946	0.6835	2.6661	2.2245	262.2952
27	Frodo	WT	1712	M	0.6261	0.996	5.6238	4.2649	238.548	0.3867	0.5586	2.754	1.5807	262.8088
27	Frodo	WT	1808	M	1.0831	1.5512	3.761	5.3509	265.27	0.6691	0.6876	2.5625	1.6448	274.3422
27	Frodo	WT	1809	M	0.7403	0.7832	4.9712	4.0119	251.95	0.2428	0.2984	2.7756	1.5576	299.8619
27	Frodo	WT	1847	M	0.6991	1.0149	5.5283	4.9371	279.216	0.7296	0.7189	3.0661	1.6632	245.737
27	Frodo	WT	1848	M	0.7974	0.8637	4.5083	3.2396	252.436	0.4026	0.4908	1.8125	1.2632	259.9919
27	Frodo	WT	1314	F	0.9773	1.7784	8.2061	10.6945	311.372	0.3425	0.4444	3.3922	1.9438	339.8042
27	Frodo	WT	1381	F	0.9782	0.9628	7.5349	10.1813	285.027	0.4964	0.5351	2.92	1.8111	315.2441
27	Frodo	WT	1493	F	1.6155	3.16	8.7808	10.9384	370.642	1.3741	1.07	5.9608	3.9978	408.0808
27	Frodo	WT	1520	F	0.9088	1.8765	7.3928	8.8028	363.54	0.6917	0.6957	3.8675	2.4567	457.6123
27	Frodo	WT	1555	F	1.1228	2.2304	7.7859	9.8037	358.014	0.7174	0.816	4.0791	2.533	413.2156
27	Frodo	WT	1559	F	0.7054	1.2878	9.7108	8.2865	357.743	0.5689	0.6991	4.9625	2.0813	387.4446
27	Frodo	WT	1601	F	0.9564	1.9426	6.254	10.6704	311.046	0.4463	0.5835	4.0128	2.8038	310.7406
27	Frodo	WT	1704	F	1.6322	3.4422	6.2956	11.6033	373.319	0.4634	0.4332	3.7524	1.6243	333.948
27	Frodo	WT	1706	F	0.649	0.9422	9.2068	10.4648	368.537	0.3959	0.5045	2.8943	1.4894	332.121
27	Frodo	WT	1707	F	0.3695	0.6626	6.1182	7.3275	276.116	NA	NA	NA	NA	NA
27	Frodo	WT	1768	F	1.1765	1.9072	6.064	7.1444	272.71	0.6312	0.6223	3.0944	1.8538	300.7364
27	Frodo	WT	1770	F	0.5537	0.9443	5.1306	8.1063	313.769	0.2639	0.4746	1.736	3.0516	326.2558
27	Frodo	WT	1771	F	1.3588	1.5263	6.9802	9.4071	339.411	0.5484	0.4942	2.7126	2.3744	350.8124
27	Frodo	WT	1772	F	0.9761	0.9386	7.7097	7.1744	334.119	0.6343	0.6765	3.494	1.4076	333.571
27	Frodo	WT	1774	F	0.7264	1.4366	9.5421	6.2072	309.847	NA	NA	NA	NA	NA
27	Frodo	WT	1778	F	0.9696	2.2619	6.8292	8.2413	382.696	0.7315	1.3325	4.917	4.0156	434.4275
27	Frodo	WT	1780	F	1.1133	2.0313	7.9952	6.5154	332.827	0.8371	0.9895	3.5469	2.24	344.7816
27	Frodo	WT	1781	F	0.9355	1.7199	7.9455	6.5213	337.399	0.4745	0.7969	2.8685	2.2161	347.758
27	Frodo	WT	1852	F	1.0804	2.4992	8.954	4.2388	290.019	0.5832	0.4934	2.4793	2.3197	302.6082
27	Frodo	WT	1855	F	0.9877	1.1749	8.651	7.7733	337.305	NA	NA	NA	NA	NA
27	Frodo	WT	1856	F	0.7272	0.6741	8.3729	5.7918	321.816	0.3745	0.3761	2.3275	1.8297	327.1808
19	Frodo	Mutant	1003	M	0.0987	1.2102	1.227	2.6908	302.453	0.0971	0.5666	0.6733	1.6901	315.6562
19	Frodo	Mutant	1017	M	0.1396	0.6765	1.0938	2.3297	306.906	0.0498	0.3306	0.5569	0.8707	329.1937
19	Frodo	Mutant	1031	M	0.0978	0.7417	1.1441	2.7632	294.906	0.0631	0.3314	0.3819	1.0471	314.6099
19	Frodo	Mutant	1032	M	0.1815	0.9895	1.6295	3.7214	279.676	0.2351	0.5571	0.7646	1.1828	291.4263
19	Frodo	Mutant	1046	M	0.3279	0.7873	1.3604	3.0958	250.94	0.1023	0.4497	0.6355	1.0657	279.5229
19	Frodo	Mutant	1124	M	0.1787	0.8567	1.2765	2.3361	271.449	0.1194	0.4721	0.6	1.115	261.8458
19	Frodo	Mutant	1155	M	0.194	0.9204	1.6226	2.4148	300.022	0.0657	0.3474	0.668	1.4805	319.7563
19	Frodo	Mutant	1156	M	0.2241	0.6091	1.1181	3.6312	296.234	0.1057	0.3361	0.8096	1.2238	281.8386
19	Frodo	Mutant	1182	M	0.2167	1.1015	1.1242	3.7118	294.167	0.2906	0.5422	1.0381	1.4537	305.478
19	Frodo	Mutant	2469	M	0.1114	0.389	0.7818	1.9697	230.071	0.0408	0.5301	0.4299	0.8635	261.4995
19	Frodo	Mutant	2470	M	0.0808	0.7249	1.2977	2.1063	285.465	0.0463	0.1616	0.5281	1.1046	286.6753
19	Frodo	Mutant	527	M	0.1741	0.752	1.2704	3.1876	274.378	0.065	0.39	0.39	0.6966	268.7446
19	Frodo	Mutant	886	M	0.2006	0.375	1.2917	2.6127	236.111	0.044	0.314	0.5208	0.8812	253.75
19	Frodo	Mutant	988	M	0.0955	0.7188	1.1331	4.148	304.635	0.1602	0.5365	0.5397	0.9831	301.0365
19	Frodo	Mutant	2481	M	0.3858	0.8687	0.7669	1.9623	263.717	0.0641	0.4115	0.6153	1.2208	254.0304
19	Frodo	Mutant	995	M	0.5406	1.0454	2.3677	5.7094	298.639	0.1469	0.6079	1.0016	1.2532	309.9999
19	Frodo	Mutant	996	M	0.0921	0.593	1.296	2.1465	259.783	0.0312	0.259	0.6468	1.0112	260.6801
19	Frodo	Mutant	341	M	0.0884	0.5066	0.823	2.5447	260.141	NA	NA	NA	NA	NA
19	Frodo	Mutant	399	F	0.1594	0.8861	2.1628	6.3652	331.224	NA	NA	NA	NA	NA
19	Frodo	Mutant	524	F	0.4845	0.9445	3.0189	5.3316	371.733	0.0892	0.3472	1.0281	1.4005	379.9899
19	Frodo	Mutant	983	F	0.2007	0.3678	2.2512	5.1754	353.396	0.0511	0.3251	0.6105	0.86	360.9917
19	Frodo	Mutant	987	F	0.1875	0.5664	1.8056	5.1489	308.068	0.0154	0.2677	0.6435	1.2369	357.6481
19	Frodo	Mutant	1015	F	0.2446	1.1141	4.6317	7.8218	360.808	0.1831	0.4434	1.04	1.7856	381.77
19	Frodo	Mutant	1105	F	0.2722	1.3043	2.6449	6.5782	346.725	NA	NA	NA	NA	NA
19	Frodo	Mutant	1106	F	0.2743	0.9708	2.5454	7.1412	396.451	0.0657	0.3125	1.1339	1.6404	378.3857
19	Frodo	Mutant	1132	F	0.3358	1.1125	2.5287	7.9425	339.311	0.0903	0.5698	0.7857	1.5427	341.241
19	Frodo	Mutant	1180	F	0.3274	0.8651	2.56	7.4048	334.173	NA	NA	NA	NA	NA
19	Frodo	Mutant	1227	F	0.2456	0.9221	2.3393	6.7315	343.988	0.0369	0.2303	0.7921	1.2808	348.5142
19	Frodo	Mutant	1248	F	0.2979	0.9984	2.901	6.228	376.803	0.0779	0.2532	0.7467	1.3815	376.0976
19	Frodo	Mutant	2474	F	0.2225	0.9642	2.1541	7.2016	338.568	0.0529	0.3243	0.1191	0.8766	374.6402
19	Frodo	Mutant	307	F	0.3156	1.2491	3.6154	6.2942	341.044	0.0333	0.4198	1.1993	2.016	374.8461
19	Frodo	Mutant	1180	F	0.3837	0.887	2.6111	7.3458	352.864	0.152	0.4161	NA	0.916	345.5057
19	Frodo	Mutant	1181	F	0.1552	1.0197	2.179	7.2709	336.828	0.0238	0.257	0.3465	0.8965	370.8147
19	Frodo	Mutant	1121	F	0.6051	1.4453	3.5407	7.3582	398.687	NA	NA	NA	NA	NA
19	Frodo	Mutant	1123	F	0.1867	0.9261	2.3068	5.2418	341.946	NA	NA	NA	NA	NA
19	Frodo	Mutant	308	F	0.2776	0.6842	1.9188	5.3425	318.471	0.0609	0.3117	0.5049	1.0284	318.8692
19	Frodo	Mutant	337	F	NA	NA	NA	NA	NA	0.0601	0.3776	0.9027	1.7712	387.1477
19	Frodo	Mutant	374	F	0.2612	0.6991	3.0244	5.0144	361.166	0.0379	0.2162	0.7804	1.141	373.8448
19	Frodo	Mutant	399	F	0.187	0.7291	2.1083	6.6713	316.072	NA	NA	NA	NA	NA
23	Frodo	Mutant	1976	M	0.4229	1.1075	2.9059	3.6932	269.124	NA	NA	NA	NA	NA
23	Frodo	Mutant	2369	M	0.2462	1.0273	2.1257	2.5494	284.505	0.2635	0.5736	1.3216	1.6523	294.9691
23	Frodo	Mutant	2372	M	0.4329	1.2091	2.6327	3.3966	300.528	0.3194	0.6574	1.6119	2.0563	328.7878
23	Frodo	Mutant	2390	M	0.2616	1.2384	2.706	3.571	317.333	0.2917	0.5401	1.6373	2.152	298.5903
23	Frodo	Mutant	2442	M	0.8211	1.9032	2.4732	4.0246	298.068	0.5983	0.7349	1.7261	2.1726	305.6302
23	Frodo	Mutant	2108	M	0.2871	0.8614	2.8581	3.3192	214.178	0.1912	0.5118	1.1134	1.5012	244.9986
23	Frodo	Mutant	2119	M	0.0828	0.5081	1.9837	3.6911	233.921	0.0568	0.4071	1.1331	1.5702	237.8259
23	Frodo	Mutant	2175	M	0.9919	2.1018	2.9452	3.4299	295.567	0.6252	1.0585	1.5159	2.6643	307.8558
23	Frodo	Mutant	2176	M	0.6429	0.8312	1.8109	3.5893	295.452	0.3815	0.7816	1.7532	1.5706	361.1221
23	Frodo	Mutant	2183	M	0.3642	0.7353	2.429	3.466	274.944	0.3904	0.5741	1.3364	1.7739	248.1968
23	Frodo	Mutant	2184	M	0.6718	0.7943	2.5998	3.675	262.96	0.1927	0.6094	1.7259	2.0489	286.0086
23	Frodo	Mutant	2206	M	0.2161	0.7522	1.7649	3.2435	241.505	0.0343	0.4432	1.1353	1.4403	274.8822
23	Frodo	Mutant	2210	M	0.7243	1.137	2.5312	3.9563	259.516	0.5957	1.0194	1.2277	1.9592	266.2337
23	Frodo	Mutant	2212	M	0.317	1.8458	2.7943	4.4796	282.006	0.4077	0.7961	1.7045	2.4757	301.967
23	Frodo	Mutant	2285	M	0.317	0.8133	1.5687	3.6129	262.902	NA	NA	NA	NA	NA
23	Frodo	Mutant	2278	M	0.2408	0.8068	2.211	4.7686	308.03	0.2784	0.6899	1.7881	1.8961	294.9757
23	Frodo	Mutant	2360	M	0.3685	1.1737	0.8993	5.6688	284.115	NA	NA	NA	NA	NA
23	Frodo	Mutant	2362	M	0.2127	0.974	1.7273	3.7987	270.904	0.1136	0.4821	0.5179	0.9943	281.1016
23	Frodo	Mutant	2368	M	0.4253	0.8451	2.274	5.0207	256.502	0.3503	0.7038	1.7272	2.3474	306.7794
23	Frodo	Mutant	2369	M	0.3338	0.9397	2.0002	2.8934	293.211	NA	NA	NA	NA	NA
23	Frodo	Mutant	1918	F	0.4069	1.223	4.8712	8.8782	363.197	NA	NA	NA	NA	NA
23	Frodo	Mutant	2000	F	0.3677	1.212	4.1448	8.2928	331.454	0.1917	0.7559	1.6428	1.8795	333.8972
23	Frodo	Mutant	2042	F	0.6478	2.2235	4.634	11.2975	334.753	0.5728	0.7622	1.1323	2.7285	348.7296
23	Frodo	Mutant	2043	F	0.3595	1.3699	4.8231	7.6985	331.055	NA	NA	NA	NA	NA
23	Frodo	Mutant	2046	F	0.7498	3.2653	5.0755	10.1479	322.746	0.6648	1.3022	2.0552	3.2006	363.6021
23	Frodo	Mutant	2050	F	0.5026	2.3632	3.6548	8.3102	334.03	0.3227	0.7756	1.5607	2.7111	361.1263
23	Frodo	Mutant	2073	F	0.5883	1.4606	5.2316	8.2582	331.603	0.3769	0.5836	1.857	2.5686	349.0169
23	Frodo	Mutant	2074	F	0.5121	2.2677	5.0475	8.7221	349.054	0.6423	0.9768	1.6041	2.5573	357.7326
23	Frodo	Mutant	2105	F	0.666	1.2451	5.9091	9.4914	346.623	0.2556	0.5326	2.0476	2.2914	343.1779
23	Frodo	Mutant	2120	F	0.6886	2.0424	2.9308	8.8388	308.549	0.3579	0.6324	1.1524	1.796	341.1591
23	Frodo	Mutant	2143	F	0.5465	0.7985	5.8278	8.7145	356.565	0.2248	0.6115	2.5424	2.8746	433.2785
23	Frodo	Mutant	2196	F	NA	NA	3.7999	NA	332.415	0.5973	1.0636	1.7864	3.8458	362.3887
23	Frodo	Mutant	2198	F	0.6613	1.4452	4.2176	7.4483	304.022	0.2685	0.5787	1.1721	2.1196	312.3194
23	Frodo	Mutant	2200	F	0.8483	1.6259	4.4162	7.5764	318.727	0.4064	0.6825	1.657	2.3616	343.8628
23	Frodo	Mutant	2214	F	0.774	2.244	4.234	9.6452	309.199	0.6896	0.9255	1.9261	3.385	346.8817
23	Frodo	Mutant	2215	F	0.8806	2.4871	6.4741	9.6097	347.835	0.546	0.7756	2.6859	3.8292	369.7687
23	Frodo	Mutant	2216	F	0.7223	1.3282	5.2412	8.7281	300.802	0.2849	0.7303	1.4309	2.2141	350.5686
23	Frodo	Mutant	2217	F	0.9399	2.4975	5.5527	11.491	356.997	0.7135	0.9586	2.1063	3.3352	374.0424
23	Frodo	Mutant	2218	F	0.4992	1.7159	4.211	8.5311	363.197	0.4392	0.5616	1.3259	2.2561	373.3877
23	Frodo	Mutant	2373	F	0.7295	1.6299	6.4207	10.1183	346.778	0.6187	0.9761	1.9452	2.9119	367.4979
23	Frodo	Mutant	2083	F	0.711	1.0176	6.3013	7.1977	339.539	NA	NA	NA	NA	NA
23	Frodo	Mutant	2173	F	0.4374	1.1757	3.7999	10.1183	288.795	NA	NA	NA	NA	NA
23	Frodo	Mutant	2386	F	0.7014	1.4967	3.3376	8.7345	367.12	0.3692	0.7495	1.7575	2.7646	403.9869
23	Frodo	Mutant	2397	F	0.8669	1.0955	6.274	6.5026	350.846	0.4455	0.5142	1.2429	1.6331	385.2689
23	Frodo	Mutant	2399	F	0.4505	0.9287	6.5632	7.5417	358.409	0.3432	0.5279	2.5494	2.6693	406.9057
23	Frodo	Mutant	2400	F	0.9113	2.0332	5.5833	7.6034	368.634	0.5756	0.8148	2.2238	3.0532	387.3009
23	Frodo	Mutant	2440	F	0.9333	1.2755	4.9262	7.9583	329.131	0.4366	0.5813	2.0046	2.1732	400.7528
27	Frodo	Mutant	1404	M	0.9547	1.3848	3.6714	3.9799	254.513	0.4261	0.8388	1.7067	2.3545	247.8696
27	Frodo	Mutant	1421	M	1.0015	4.4981	4.1851	4.4981	192.256	0.24	0.975	1.5729	2.2157	223.7447
27	Frodo	Mutant	1441	M	0.9811	1.7512	3.0336	4.3128	255.622	0.7964	0.9138	1.7619	2.1428	252.346
27	Frodo	Mutant	1444	M	1.5609	2.3883	5.2548	5.4805	268.519	1.2313	0.9935	2.392	2.5527	281.2623
27	Frodo	Mutant	1451	M	0.4943	1.1526	4.073	4.7004	278.876	0.4375	0.9375	2.138	2.3027	294.901
27	Frodo	Mutant	1452	M	1.1092	2.1946	4.6732	5.8924	237.108	0.656	0.9918	2.5123	1.7758	228.4267
27	Frodo	Mutant	1453	M	1.1139	2.0576	3.6972	5.0943	256.514	0.7979	1.198	2.013	2.1225	281.4084
27	Frodo	Mutant	1487	M	1.2053	1.9156	5.1217	4.4797	223.296	0.6526	0.8685	2.2135	1.7256	237.0354
27	Frodo	Mutant	1547	M	0.651	2.0768	3.7764	4.5875	248.69	NA	NA	NA	NA	NA
27	Frodo	Mutant	1549	M	0.5583	2.5074	4.4162	6.9228	268.084	0.6683	1.1092	1.812	2.9179	273.5446
27	Frodo	Mutant	1550	M	0.5479	1.5349	2.2865	3.4821	239.78	0.4075	0.9115	1.7719	2.4148	282.0513
27	Frodo	Mutant	1551	M	0.677	1.9702	4.0565	4.5591	244.737	0.5097	0.7677	1.4416	2.1107	229.5094
27	Frodo	Mutant	1738	M	0.894	3.022	7.9157	9.4488	302.613	NA	NA	NA	NA	NA
27	Frodo	Mutant	1741	M	1.138	3.5552	8.168	13.5746	343.419	0.9562	1.3945	3.4131	3.7597	366.2495
27	Frodo	Mutant	1806	M	0.6924	1.8807	2.698	3.2061	250.113	0.4261	0.7816	1.3328	2.2337	254.1505
27	Frodo	Mutant	1849	M	0.5056	1.3576	3.8669	4.282	257.85	0.5095	0.7428	1.5301	1.9545	259.6205
27	Frodo	Mutant	1850	M	1.0569	3.1635	3.5407	5.1329	234.101	0.8515	0.894	1.4517	2.3201	250.9273
27	Frodo	Mutant	1311	F	4.0825	4.0825	6.4346	12.4645	304.922	0.8017	1.2427	3.2619	4.1164	310.8698
27	Frodo	Mutant	1312	F	3.2606	3.2606	4.3921	10.9928	275.955	0.719	0.9502	2.3217	3.7357	297.3934
27	Frodo	Mutant	1313	F	2.6413	2.6413	5.0153	9.812	291.934	0.6934	0.8371	2.5272	3.5558	308.5576
27	Frodo	Mutant	1382	F	NA	NA	NA	NA	NA	0.6431	0.9547	2.7388	3.6043	282.3507
27	Frodo	Mutant	1383	F	0.9534	1.8418	5.2789	7.0701	297.121	0.6484	0.9333	2.3289	5.303	285.8493
27	Frodo	Mutant	1384	F	1.662	4.6297	9.6117	11.9582	330.74	0.8771	1.1275	3.0552	3.2333	335.1291
27	Frodo	Mutant	1385	F	1.1872	2.6576	7.7889	11.2856	303.426	0.89	1.119	2.83	3.3768	320.2166
27	Frodo	Mutant	1386	F	0.7037	2.5738	6.1737	8.3165	240.227	0.6493	0.7549	2.1242	2.776	251.364
27	Frodo	Mutant	1407	F	0.9476	1.823	7.2744	9.4262	331.211	0.3779	0.7358	2.2216	2.4757	354.6014
27	Frodo	Mutant	1408	F	1.0607	3.1535	6.2602	8.7019	253.906	0.8924	0.9893	2.8144	3.1995	281.7243
27	Frodo	Mutant	1440	F	1.4662	3.3015	8.2201	11.4574	313.508	0.9775	0.9783	3.901	4.6473	376.3982
27	Frodo	Mutant	1446	F	0.6867	3.1363	5.6039	9.6793	274.084	0.7232	0.8222	2.3076	3.1826	273.3728
27	Frodo	Mutant	1458	F	0.7004	2.3961	6.6144	12.2878	358.704	0.057	0.9089	2.0833	6.2339	305.2903
27	Frodo	Mutant	1465	F	1.0689	2.7872	7.9421	10.7052	337.25	0.588	1.2225	2.7282	6.3907	340.6639
27	Frodo	Mutant	1518	F	1.1962	2.8949	7.5008	10.4548	337.14	0.2135	1.757	3.2241	5.4417	306.766
27	Frodo	Mutant	1519	F	1.9783	3.3195	10.1703	11.8222	360.691	0.9136	1.2748	2.7656	4.0445	379.3471
27	Frodo	Mutant	1521	F	1.4421	4.2429	5.5799	9.6566	286.751	0.8531	1.1709	2.3754	4.1297	292.6988
27	Frodo	Mutant	1522	F	1.1932	5.1328	8.5646	16.4548	342.942	NA	NA	NA	NA	NA
27	Frodo	Mutant	1523	F	0.6935	2.3611	6.9878	11.2143	336.722	0.3081	0.8156	3.0064	3.5928	339.4098
27	Frodo	Mutant	1556	F	1.4902	4.5535	8.0576	13.1208	337.804	0.9066	1.5698	3.4074	5.3043	343.4193
27	Frodo	Mutant	1557	F	0.5292	3.0698	4.4326	12.0234	300.672	0.4602	1.3003	2.2402	3.5755	331.3098
27	Frodo	Mutant	1558	F	1.6141	5.7865	8.3193	13.6263	379.658	0.7594	1.6584	2.6363	4.2216	389.4352
27	Frodo	Mutant	1600	F	0.5988	1.6914	3.8233	9.4313	277.597	0.4174	0.9761	2.0556	2.1744	274.527
27	Frodo	Mutant	1705	F	1.0566	3.3678	6.7939	13.1542	321.239	0.6043	1.2241	2.9368	4.1289	355.7614
27	Frodo	Mutant	1708	F	1.0279	3.2627	7.0344	12.1657	303.278	NA	NA	NA	NA	NA
27	Frodo	Mutant	1713	F	0.3818	1.8883	5.1839	6.8497	324.884	0.6757	1.0993	2.4031	3.2463	360.0874
27	Frodo	Mutant	1732	F	1.22	2.3801	9.0287	12.7519	359.342	0.9195	0.9425	3.8103	4.6363	356.621
27	Frodo	Mutant	1734	F	1.0946	2.7542	6.4578	9.8227	334.99	0.6372	0.9879	2.0175	2.9139	311.9269
27	Frodo	Mutant	1739	F	1.5207	5.2854	9.4871	14.3387	342.162	1.0143	1.8898	2.9275	6.1936	355.5015
27	Frodo	Mutant	1767	F	0.8918	2.5748	6.4043	10.041	309.791	0.362	1.7805	2.4258	4.2297	320.8748
27	Frodo	Mutant	1769	F	0.7346	2.3872	6.5495	9.9001	307.4	0.4383	1.0909	2.9261	4.7126	326.2384
27	Frodo	Mutant	1773	F	0.8261	3.3463	3.9886	8.2652	282.725	0.3527	1.3303	1.7312	3.2674	297.4277
27	Frodo	Mutant	1775	F	0.9344	3.2469	7.179	12.3912	329.961	NA	NA	NA	NA	NA
27	Frodo	Mutant	1776	F	0.9342	2.3805	6.2326	8.5769	299.832	0.7157	0.9689	1.9292	3.0528	286.5958
27	Frodo	Mutant	1777	F	0.7373	2.4762	5.1995	11.2979	332.615	NA	NA	NA	NA	NA
27	Frodo	Mutant	1779	F	0.651	3.2516	9.2365	10.9606	383.884	0.6841	1.2191	2.663	3.7361	471.3041
27	Frodo	Mutant	1787	F	1.471	4.4973	6.7066	13.0689	411.895	0.9133	2.0649	4.0166	5.433	405.067
27	Frodo	Mutant	1794	F	1.3243	4.3399	6.298	10.8234	387.177	0.7915	1.6511	2.2717	4.5919	403.3489
27	Frodo	Mutant	1795	F	1.1141	2.9261	6.1962	13.9909	334.278	1.1453	1.2578	2.8965	5.3234	380.198
27	Frodo	Mutant	1851	F	1.2102	3.3998	6.7265	8.4244	306.478	0.4934	0.9294	2.362	3.4877	338.5317
27	Frodo	Mutant	1853	F	0.931	2.4548	5.9113	10.1682	316.101	NA	NA	NA	NA	NA
27	Frodo	Mutant	1854	F	0.7939	3.94	5.6494	11.8587	320.736	0.6437	1.3818	2.1847	3.9827	326.7461
27	Frodo	Mutant	1857	F	1.009	3.6346	6.3251	8.6182	386.745	0.6872	1.5739	2.3399	4.0689	373.9132
27	Frodo	Mutant	1858	F	0.4634	1.798	3.8012	10.667	339.087	0.5074	1.2358	1.7191	3.5878	340.4571
27	Frodo	Mutant	1859	F	0.8338	3.2863	3.9708	10.1389	318.528	0.6276	1.1227	1.8321	3.0656	334.1027
19	Bigeye	WT	902	M	0.3448	0.3787	3.3937	2.7364	292.349	0.0633	0.177	0.9592	0.7074	271.537
19	Bigeye	WT	911	M	0.2095	0.4165	1.5882	1.8498	308.843	0.1011	0.1982	0.6661	0.6853	334.9004
19	Bigeye	WT	232	M	0.1499	0.3882	2.6259	1.6238	257.141	0.026	0.1476	0.606	0.4892	272.6928
19	Bigeye	WT	647	M	0.2014	0.5024	3.958	3.5278	295.628	0.1043	0.3651	1.3835	1.093	358.4894
19	Bigeye	WT	805	M	0.0827	0.2753	2.487	1.7832	319.977	0.0594	0.2359	0.5842	0.6155	342.5242
19	Bigeye	WT	627	F	0.309	0.4422	6.3575	5.7099	302.916	0.0995	0.2095	0.9084	0.7207	335.5841
19	Bigeye	WT	648	F	0.4695	0.5585	6.006	5.295	323.37	0.1292	0.2327	1.2985	0.9092	334.1292
19	Bigeye	WT	807	F	0.3551	0.6873	4.7619	3.0354	323.848	NA	NA	NA	NA	NA
19	Bigeye	WT	943	F	0.2021	0.2692	5.6069	5.6045	327.63	0.0616	0.1662	1.0783	0.7451	322.5882
19	Bigeye	WT	967	F	0.1412	0.3394	4.5473	4.4498	351.93	0.1436	0.2614	0.6617	0.5072	382.3617
23	Bigeye	WT	60	M	0.786	0.7227	4.7274	4.6316	296.649	0.4289	0.3991	2.0962	1.1759	292.8619
23	Bigeye	WT	110	M	1.5633	1.5739	6.6103	3.379	295.598	1.0755	0.8726	3.1242	1.7476	249.6603
23	Bigeye	WT	184	M	0.4884	0.647	4.2766	3.1783	320.343	0.176	0.3164	1.5481	0.924	323.3967
23	Bigeye	WT	253	M	0.8985	1.0446	5.1436	4.0657	269.187	0.4927	0.5893	1.9107	1.3117	313.0104
23	Bigeye	WT	254	M	1.199	1.2744	5.4892	4.8624	296.509	0.5104	0.5794	2.7815	2.2334	315.0278
23	Bigeye	WT	428	M	0.8076	0.7288	4.9452	4.1767	251.092	0.3347	0.536	2.3447	1.6635	247.7451
23	Bigeye	WT	429	M	0.6867	0.8241	5.9334	3.5884	235.506	0.4784	0.4815	1.2238	1.4306	278.5532
23	Bigeye	WT	610	M	0.7319	0.8364	4.339	3.3161	262	0.3168	0.4705	2.2315	1.2445	266.3189
23	Bigeye	WT	916	M	0.206	0.4113	3.3086	2.6559	253.407	0.24	0.3256	0.9985	0.6705	268.8125
23	Bigeye	WT	577	M	NA	NA	NA	NA	NA	NA	0.4726	1.8685	1.1709	281.9499
23	Bigeye	WT	427	F	0.7725	1.5189	7.0372	7.8557	312.162	0.3495	0.4474	2.3853	1.5568	353.7906
23	Bigeye	WT	760	F	0.4323	0.6718	8.3737	6.9942	271.382	0.1026	0.2477	1.6057	0.9159	317.5833
23	Bigeye	WT	575	F	0.4077	0.8442	6.5541	5.8005	358.818	0.126	0.3258	1.2961	1.0577	344.366
23	Bigeye	WT	690	F	0.8426	0.9317	7.0741	7.0308	327.313	0.3154	0.4968	2.2551	1.5874	315.2662
23	Bigeye	WT	691	F	1.1642	1.1494	7.8759	10.5295	316.032	0.1533	0.3651	1.5801	1.2455	290.1749
27	Bigeye	WT	320	M	1.6354	2.0973	5.667	4.5657	281.657	0.7467	0.6631	2.5316	2.0714	284.3995
27	Bigeye	WT	500	M	1.2112	1.309	4.5749	3.669	224.063	0.5547	0.7401	2.2851	1.2932	234.5537
27	Bigeye	WT	862	M	0.5965	1.1007	5.0988	4.6932	262.467	0.4711	0.6091	1.9245	1.5118	244.5714
27	Bigeye	WT	868	M	0.7137	0.4336	5.1813	3.9969	263.684	0.3177	0.4075	1.4434	0.7497	267.9054
27	Bigeye	WT	30	F	0.8458	1.4464	5.3522	6.0584	300.033	0.3807	0.4927	1.6428	3.332	303.28
27	Bigeye	WT	155	F	0.6368	1.7367	7.0785	9.3762	349.83	0.434	0.666	2.9913	1.8819	345.5908
27	Bigeye	WT	156	F	0.6265	0.6867	5.3696	5.3025	282.639	0.2454	0.436	1.973	1.1281	282.875
27	Bigeye	WT	244	F	1.3241	1.5509	7.8835	7.8881	312.915	0.7321	0.9065	3.4494	3.1413	301.5346
27	Bigeye	WT	497	F	0.8239	1.651	7.9042	10.2524	367.974	NA	NA	NA	NA	NA
27	Bigeye	WT	515	F	0.4707	0.5579	6.7539	6.0748	283.118	0.2412	0.5531	2.0409	1.1006	331.6056
27	Bigeye	WT	322	F	0.718	0.9027	6.5159	8.5082	306.495	NA	NA	NA	NA	NA
19	Bigeye	Mutant	732	M	0.5349	0.5933	6.8271	3.2824	305.075	0.3222	0.5032	2.125	1.2459	390.5325
19	Bigeye	Mutant	800	M	0.3	0.6602	6.0337	4.9148	274.42	0.1568	0.5196	2.1605	1.6947	279.1907
19	Bigeye	Mutant	109	M	0.6531	0.8021	6.1999	4.172	276.427	0.2848	0.3964	2.1028	1.4037	286.4236
19	Bigeye	Mutant	679	M	0.234	1.2378	5.5964	3.8537	295.548	0.4291	0.5789	2.4333	1.6868	304.3111
19	Bigeye	Mutant	611	M	0.8805	1.1202	5.0483	4.9498	282.775	0.3107	0.4802	1.6045	1.2744	272.3883
19	Bigeye	Mutant	576	M	1.3895	2.3308	5.7845	4.3287	302.613	NA	NA	NA	NA	NA
19	Bigeye	Mutant	618	F	0.5973	0.6573	7.1156	8.7631	338.224	0.127	0.3472	1.6704	1.1859	365.2167
19	Bigeye	Mutant	641	F	NA	NA	6.9296	8.965	363.889	NA	NA	1.233	0.8503	378
19	Bigeye	Mutant	642	F	NA	NA	NA	NA	NA	NA	NA	NA	NA	NA
19	Bigeye	Mutant	733	F	0.6966	1.1701	12.093	9.2634	386.142	NA	NA	NA	NA	NA
19	Bigeye	Mutant	734	F	0.4346	0.8286	9.3763	8.4064	324.077	NA	0.5105	2.4042	1.4266	434.6042
19	Bigeye	Mutant	897	F	0.886	1.3578	11.5016	17.315	346.554	0.1131	0.2013	1.8164	2.3759	336.4502
19	Bigeye	Mutant	901	F	0.3535	0.4908	12.6034	7.7557	359.345	0.1131	0.2567	1.6377	0.8739	364.9816
19	Bigeye	Mutant	936	F	0.3706	1.3069	10.7378	10.4507	319.785	0.2083	0.6063	2.2432	1.7009	357.0675
19	Bigeye	Mutant	967	F	0.1412	0.3394	4.5473	4.4498	351.93	0.1436	0.2614	0.6617	0.5072	382.3617
19	Bigeye	Mutant	2482	F	0.7873	0.7256	9.8335	7.6917	339.961	0.0952	0.4104	1.7259	1.3888	370.466
19	Bigeye	Mutant	608	F	0.2653	0.5524	8.9815	9.4839	385.269	0.1451	0.3566	1.5082	0.7639	467.3169
23	Bigeye	Mutant	111	M	2.5241	2.6449	11.5184	6.5735	280.792	1.0581	0.9855	4.563	3.0828	324.959
23	Bigeye	Mutant	430	M	1.2375	1.8426	11.4526	5.5702	329.394	NA	NA	NA	NA	NA
23	Bigeye	Mutant	431	M	1.336	1.4846	6.2727	7.172	326.174	0.2971	1.1128	2.4927	2.0292	308.452
23	Bigeye	Mutant	432	M	0.6312	0.8222	7.5653	6.6761	292.541	0.3701	0.6596	2.9976	2.2022	326.223
23	Bigeye	Mutant	433	M	1.0376	1.2046	7.1279	6.3318	309.764	NA	NA	NA	NA	NA
23	Bigeye	Mutant	558	M	1.3422	1.9979	9.6737	6.0851	282.102	0.8514	0.8545	3.6864	2.2235	307.7476
23	Bigeye	Mutant	597	M	1.5205	1.6759	10.4098	6.3447	314.4	0.5208	0.5003	4.2648	1.7414	339.905
23	Bigeye	Mutant	61	M	1.781	2.4593	8.5527	6.9927	343.914	0.9131	0.8656	3.8919	2.0849	348.0498
23	Bigeye	Mutant	598	F	NA	NA	NA	NA	NA	0.7248	0.9221	3.2061	3.1315	363.7048
23	Bigeye	Mutant	665	F	1.6347	1.9517	14.9187	10.6204	382.589	0.4655	0.902	4.8905	2.6491	396.217
23	Bigeye	Mutant	666	F	2.1026	3.515	10.7015	10.6581	334.507	0.6934	1.0192	5.0149	3.145	375.1053
23	Bigeye	Mutant	759	F	0.3452	0.5578	7.4422	8.0524	306.927	NA	NA	NA	NA	NA
23	Bigeye	Mutant	813	F	0.3222	1.3172	15.1974	9.8929	407.586	NA	NA	NA	NA	NA
23	Bigeye	Mutant	814	F	0.486	0.6131	5.8121	5.6724	290.801	0.3854	0.5647	3.4366	2.5239	417.7512
23	Bigeye	Mutant	964	F	0.4718	0.6012	10.701	8.0403	262.259	0.0961	0.3835	1.3863	1.279	286.5871
23	Bigeye	Mutant	965	F	1.8557	2.8241	10.0748	10.1659	297.228	0.6373	0.9259	2.483	2.6728	305.4097
27	Bigeye	Mutant	865	M	1.6916	1.9413	7.8044	7.0066	257.507	0.7366	0.8949	3.0523	3.3746	255.6514
27	Bigeye	Mutant	863	M	1.3595	2.3995	7.0316	7.9314	257.547	NA	NA	NA	NA	NA
27	Bigeye	Mutant	154	M	2.0548	2.2747	8.3927	5.7941	251.333	1.3441	0.8804	3.0332	2.2878	245.4167
27	Bigeye	Mutant	157	M	2.3498	2.6379	10.2681	16.3118	299.015	1.3272	2.0594	8.8412	4.952	297.8601
27	Bigeye	Mutant	161	M	2.0203	3.3393	9.155	8.7597	285.339	1.1234	1.3742	4.6185	2.5641	333.1142
27	Bigeye	Mutant	278	M	1.6972	2.951	10.11	8.5942	241.93	NA	NA	2.41	2.4107	258.6559
27	Bigeye	Mutant	321	M	2.1893	2.7044	10.2965	7.7249	272.289	1.1904	1.2736	4.9907	4.3062	276.2996
27	Bigeye	Mutant	405	M	2.5406	1.7589	9.6265	6.862	285.156	1.3563	1.0487	4.4212	2.4837	278.1796
27	Bigeye	Mutant	8	M	2.9163	2.1762	9.4251	5.4625	301.29	1.2948	1.4534	4.5031	3.4126	267.8639
27	Bigeye	Mutant	83	M	2.5107	3.0946	11.7954	8.2265	322.615	1.1331	0.9192	4.0935	2.7861	323.0558
27	Bigeye	Mutant	84	M	1.5995	2.4102	9.9028	6.0849	274.952	1.1312	1.3356	2.091	2.9537	235.034
27	Bigeye	Mutant	86	M	1.6682	2.9096	8.8691	5.8363	302.898	NA	NA	NA	NA	NA
27	Bigeye	Mutant	278	M	1.6885	2.8918	10.4643	7.619	254.326	1.2094	1.0767	3.4503	2.1441	260.8065
27	Bigeye	Mutant	85	M	2.1764	2.8505	12.4108	8.9977	327.313	0.825	1.284	4.3729	3.6081	325.4283
27	Bigeye	Mutant	859	M	2.3158	3.423	9.0431	7.4467	263.128	0.6779	1.1049	4.0281	2.8385	284.8818
27	Bigeye	Mutant	10	F	1.4365	2.2663	10.7368	10.5065	335.076	0.2993	1.6893	2.544	5.7845	347.9749
27	Bigeye	Mutant	11	F	1.3209	2.637	13.2125	9.4335	288.226	0.8274	0.8844	4.9427	2.8553	351.7186
27	Bigeye	Mutant	279	F	2.8921	2.9769	16.0263	12.4932	328.871	1.4254	0.9645	7.1496	5.4059	337.8217
27	Bigeye	Mutant	28	F	1.7446	1.7922	14.2645	11.3776	332.496	0.1311	0.6695	4.0362	5.3564	296.9539
27	Bigeye	Mutant	29	F	1.3793	2.0189	11.7052	10.8086	364.45	0.0944	1.046	3.8826	3.0927	388.519
27	Bigeye	Mutant	400	F	NA	NA	NA	NA	NA	NA	NA	NA	NA	NA
27	Bigeye	Mutant	496	F	2.1461	4.2037	15.4236	14.5315	345.406	1.4139	1.4708	5.5105	4.4407	334.99
27	Bigeye	Mutant	498	F	1.479	3.2076	14.0022	12.0938	349.663	0.7544	0.8844	5.486	2.8987	359.4684
27	Bigeye	Mutant	499	F	1.4034	2.2881	14.594	16.7888	360.114	0.6258	0.9448	5.3084	4.3774	351.1579
27	Bigeye	Mutant	501	F	1.5802	2.5887	10.7755	10.8873	250.671	NA	NA	NA	NA	NA
27	Bigeye	Mutant	502	F	1.0232	2.1218	6.2227	10.305	244.196	0.2801	0.5754	2.4284	1.8843	248.9266
27	Bigeye	Mutant	503	F	NA	NA	NA	NA	NA	0.6554	1.0065	4.4482	3.767	264.5985
27	Bigeye	Mutant	514	F	2.1596	3.3266	11.1137	13.5747	261.629	NA	NA	NA	NA	NA
27	Bigeye	Mutant	567	F	1.7778	2.9167	11.8187	15.9205	306.776	0.635	0.8927	5.7886	3.8742	320.0617
27	Bigeye	Mutant	588	F	1.0973	1.047	11.9883	14.0831	309.683	0.5143	0.6128	4.6908	3.2256	313.8366
27	Bigeye	Mutant	729	F	2.3521	4.2151	15.7027	17.1064	364.815	1.3706	1.2325	6.4315	5.7742	400.3961
27	Bigeye	Mutant	753	F	1.2471	1.6315	16.2605	14.0199	303.107	0.2793	0.7463	4.0743	3.6522	315.8729
27	Bigeye	Mutant	10	F	1.6643	2.0414	12.6403	10.7052	375.175	0.4194	1.5148	3.0878	6.0062	350.2861
27	Bigeye	Mutant	860	F	1.2624	2.3205	10.4959	8.9885	254.121	0.5844	0.7709	3.7265	2.528	284.6891
27	Bigeye	Mutant	861	F	2.7597	3.6235	11.2333	14.387	317.687	NA	NA	NA	NA	NA
27	Bigeye	Mutant	864	F	2.0511	2.0211	16.7385	14.3505	351.507	NA	NA	NA	NA	NA
27	Bigeye	Mutant	866	F	2.7837	2.1012	15.0234	14.1957	359.819	1.2775	1.1157	6.9325	4.2143	359.4006
27	Bigeye	Mutant	867	F	1.3572	2.3537	14.1807	12.8937	375.466	0.7677	0.8419	6.4694	3.7937	387.8061
27	Bigeye	Mutant	9	F	1.4992	2.4844	11.8414	10.4014	283.324	0.3719	1.7044	3.564	4.5197	282.4607
